# Supplementary material for: Exploration of 1,3-dipolar cycloaddition reactions to construct the core skeleton of Calyciphylline A-type alkaloids
Source: Royal Society of Chemistry journal article supplement (doi:10.1039/c9qo01111k), 2019-01-01

# Exploration of 1,3-dipolar cycloaddition reactions to construct the core skeleton of Calyciphylline A-type alkaloids

Jiaxin Zhong,<sup>a</sup> Haibing He<sup>\*b</sup>, Shuanhu Gao<sup>\*a,b</sup>

<sup>a</sup> Shanghai Key Laboratory of Green Chemistry and Chemical Processes, School of Chemistry and Molecular Engineering, East China Normal University, 3663N Zhongshan Road, Shanghai 200062, China

<sup>b</sup> Shanghai Engineering Research Center of Molecular Therapeutics and New Drug Development, East China Normal University, 3663N Zhongshan Road, Shanghai 200062, China

## Index

|                                                         |            |
|---------------------------------------------------------|------------|
| <b>I. Experimental Procedures</b>                       | <b>S2</b>  |
| <b>II. <sup>1</sup>H and <sup>13</sup>C NMR Spectra</b> | <b>S22</b> |

## I. Experimental Procedures

### General Information:

Oxygen- and moisture-sensitive reactions were carried out under nitrogen atmosphere. Solvents were purified and dried by standard. All reactions were monitored by thin-layer chromatography with Huang Hai silica gel HSGF254 pre-coated plates (0.2 mm). Column chromatography was carried out on silica gel (200–300 mesh) purchased from *Silicycle* Silia Flash® P60. All commercially available reagents and catalysts were purchased from Sigma-Aldrich, TCI, Alfa Aesar, Strem Chemicals and J&K Chemical.  $^1\text{H}$  and  $^{13}\text{C}$  NMR spectra were recorded on Bruker-500, 400 spectrometers. Chemical shifts for  $^1\text{H}$  and  $^{13}\text{C}$  NMR spectra are reported in ppm ( $\delta$ ) relative to residue protium in the solvent ( $^1\text{H}$ ,  $\delta$  7.26 ppm for  $\text{CDCl}_3$ ;  $^{13}\text{C}$ ,  $\delta$  77.00 ppm for  $\text{CDCl}_3$ ; the multiplicities are presented as follows: s = singlet, d = doublet, t = triplet, q = quartet, m = multiplet. High-resolution mass spectra (HRMS) were acquired on Waters Micromass GCT Premier or Bruker Daltonics Inc. APEXIII 7.0 TESLA FTMS. Mass spectra were acquired on Agilent 5975C. Specific rotation was performed on Rudolph Research Analytical Autopol VI Polarimeter ( $\lambda$  = 589 nm,  $T$  = 20 °C).

### Experimental Procedures and Compound Characterization:

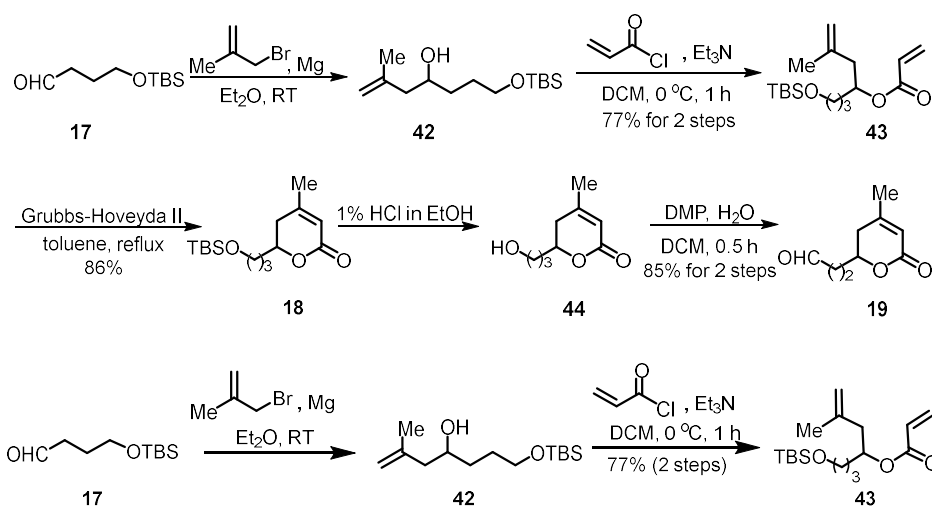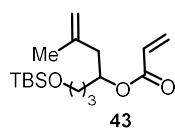

To a suspension of aldehyde **17** (4.0 g, 19.77 mmol, 1.0 equiv.) and magnesium chips (2.4 g, 98.83 mmol, 5.0 equiv.) in diethyl ether (200 mL) was added 3-bromo-2-methylpropene (13.34g, 98.83 mmol, 5.0 equiv.) at room temperature during 10 min as the solution turned yellow, the mixture was stirred at room temperature for 2 hours, quenched by methanol (4 mL) and saturated  $\text{NH}_4\text{Cl}$  (aq.). Then the mixture was extracted with ethyl acetate (2×100

mL), the combined organic layer was washed with brine (3×50 mL), dried over Na<sub>2</sub>SO<sub>4</sub>, filtered and concentrated in vacuo to afford the crude product **42** (4.98 g), which was used directly for next step without further purification.

To a solution of crude product alcohol **42** (4.98 g) in dichloromethane (100 mL) was added triethylamine (3.9 g, 38.53 mmol, 2.0 equiv.) at 0 °C, then acryloyl chloride (2.8 g, 38.53 mmol, 2.0 equiv.) was added dropwise during 10 min. The reaction was stirred at 0 °C for 3 hours, then the mixture was poured into pre-ice cold saturated NH<sub>4</sub>Cl (aq.) and extracted with ethyl acetate (300 mL). The combined organic layer was washed with brine (3×50 mL), dried over Na<sub>2</sub>SO<sub>4</sub>, filtered and concentrated in vacuo to afford the crude product, which was purified by silica gel column chromatography (2% to 4% ethyl acetate-petroleum ether) to give product **43** as a yellowish oil (4.66 g, 77% for 2 steps); *R<sub>f</sub>* = 0.6 (7.5% ethyl acetate-petroleum ether); <sup>1</sup>H NMR (500 MHz, CDCl<sub>3</sub>) δ 6.37 (d, *J* = 17.3 Hz, 1H), 6.09 (dd, *J* = 17.3, 10.4 Hz, 1H), 5.79 (d, *J* = 10.4 Hz, 1H), 5.13 (m, 1H), 4.74 (d, *J* = 17.2 Hz, 2H), 3.71 – 3.44 (m, 2H), 2.29 (dd, *J* = 21.6, 6.5 Hz, 2H), 1.75 (s, 3H), 1.59 – 1.49 (m, 2H), 1.31 (d, *J* = 14.7 Hz, 2H), 0.88 (s, 9H), 0.04 (s, 6H) ppm; <sup>13</sup>C NMR (126 MHz, CDCl<sub>3</sub>) δ 165.9, 141.6, 130.3, 128.8, 113.4, 72.2, 62.7, 42.9, 30.3, 28.6, 25.9, 22.5, 18.3, -5.3 ppm; IR *v*<sub>max</sub> 3734, 2361, 2342, 1722, 1275, 833 cm<sup>-1</sup>; HRMS–EI (*m/z*): [*M*]<sup>+</sup> calcd for C<sub>17</sub>H<sub>32</sub>O<sub>3</sub>Si, 312.2121; found, 312.2126.

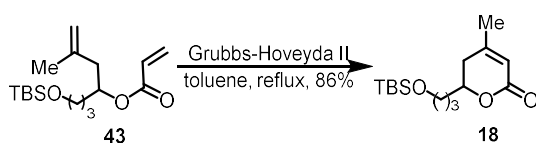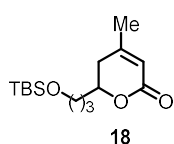

To a solution of diene **43** (320 mg, 1.02 mmol, 1.0 equiv.) in toluene (50 mL) was added Hoveyda-Grubbs II catalyst (19 mg, 0.03 mmol, 0.03 equiv.) in one portion. The mixture was heated to reflux and stirred for 3 hours. The reaction mixture was cooled to room temperature and concentrated in vacuo to afford the crude product, which was purified by silica gel column chromatography (4% to 10% ethyl acetate-petroleum ether) to give product **18** as dark oil (250 mg, 86%); *R<sub>f</sub>* = 0.4 (20% ethyl acetate-petroleum ether); <sup>1</sup>H NMR (500 MHz, CDCl<sub>3</sub>) δ 5.94 – 5.74 (m, 1H), 4.55 – 4.35 (m, 1H), 3.72 – 3.57 (m, 2H), 2.38 – 2.27 (m, 1H), 2.21 (dd, *J* = 17.8, 3.9 Hz, 1H), 1.97 (s, 3H), 1.87 – 1.56 (m, 4H), 0.89 (s, 9H), 0.04 (s, 6H) ppm; <sup>13</sup>C NMR (126 MHz, CDCl<sub>3</sub>) δ 165.4, 157.1, 116.5, 77.2, 62.6, 34.7, 31.4, 28.0, 25.9, 23.0, 18.3, -5.4 ppm; IR *v*<sub>max</sub> 3736, 2886, 1387, 1250, 775 cm<sup>-1</sup>; HRMS–EI (*m/z*): [*M*]<sup>+</sup> calcd for C<sub>15</sub>H<sub>28</sub>O<sub>3</sub>Si, 284.1808; found, 284.1805.

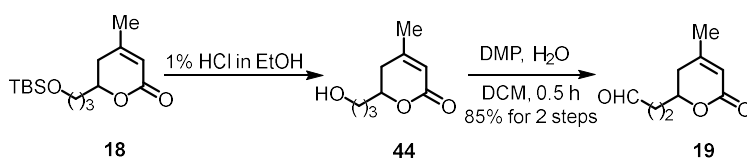

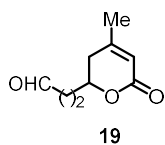

To a solution of lactone **18** (333 mg, 1.17 mmol, 1.0 equiv.) in ethanol (1 mL) was added hydrochloric acid (1% in ethanol, 12 mL) dropwise during 2 min. The mixture was stirred at room temperature for 10 min. Then saturated NaHCO<sub>3</sub> (aq.) was added to quench the reaction and concentrated in vacuo, diluted by ethyl acetate (50 mL) and washed with brine (3×10 mL), dried over Na<sub>2</sub>SO<sub>4</sub>, concentrated in vacuo to afford the crude product **44** (200 mg), which was used directly for next step without further purification.

To a stirred crude product solution of alcohol **44** (200 mg) in dichloromethane (15 mL) was added Dess-Martin periodinane (1.5 g, 3.53 mmol, 3.0 equiv.) in one portion, followed by an addition of water (60 μL) and the solution turned turbid and stirred at room temperature for 30 min. The reaction was quenched with saturated NaHCO<sub>3</sub> (aq., 5 mL) and saturated Na<sub>2</sub>S<sub>2</sub>O<sub>3</sub> (aq., 5 mL), extracted with ethyl acetate (3×20 mL). The combined organic layer was washed with brine (2×10 mL), dried over Na<sub>2</sub>SO<sub>4</sub>, filtered and concentrated in vacuo to afford the crude product, which was purified by silica gel column chromatography (50% to 70% ethyl acetate-petroleum ether) to give product **19** as colorless oil (167 mg, 85% for 2 steps); *R<sub>f</sub>* = 0.7 (75% ethyl acetate-petroleum ether); <sup>1</sup>H NMR (400 MHz, CDCl<sub>3</sub>) δ 9.83 (t, *J* = 0.7 Hz, 1H), 5.82 – 5.79 (m, 1H), 4.42 (ddt, *J* = 11.7, 8.9, 3.9 Hz, 1H), 2.76 (dt, *J* = 7.5, 3.9 Hz, 2H), 2.40 – 2.29 (m, 1H), 2.28 – 2.19 (m, 1H), 2.11 – 2.01 (m, 1H), 2.01 – 1.92 (m, 4H) ppm; <sup>13</sup>C NMR (101 MHz, CDCl<sub>3</sub>) δ 201.0, 164.8, 157.1, 116.4, 75.9, 39.2, 34.8, 26.9, 22.9 ppm; IR *v*<sub>max</sub> 3727, 2361, 2342, 1717, 1260, 748 cm<sup>-1</sup>, HRMS–EI (*m/z*): [*M*]<sup>+</sup> calcd for C<sub>9</sub>H<sub>12</sub>O<sub>3</sub>, 168.0786; found, 168.0787.

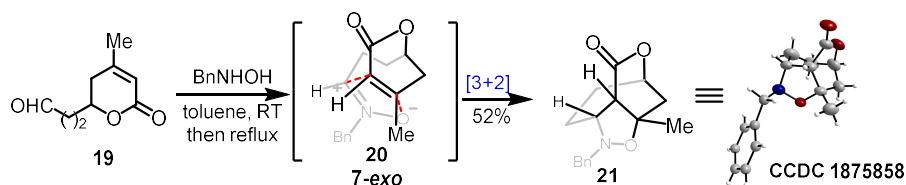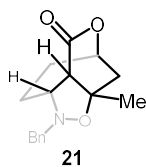

To a solution of aldehyde **19** (200 mg, 1.19 mmol, 1.0 equiv.) in toluene was added potassium carbonate (361 mg, 2.62 mmol, 2.2 equiv.) followed by *N*-benzylhydroxylamine hydrochloride (285 mg, 1.78 mmol, 1.5 equiv.) in one portion. The mixture was stirred at room temperature overnight until all the amine hydrochloride was dissolved to get a clarified solution. Then the solution was filtered and concentrated to obtain a greenish oil which was redissolved by toluene and heated to reflux at least 8 hours. The mixture was concentrated to afford the crude product, which was purified by silica gel column chromatography (10% to 20% ethyl acetate-petroleum ether) to give product **21** as yellowish powder (170 mg, 52%); *R<sub>f</sub>* = 0.5 (20% ethyl acetate-petroleum ether); <sup>1</sup>H NMR (400 MHz, CDCl<sub>3</sub>) δ 7.40 – 7.23 (m, 5H), 4.79 (ddd, *J* = 9.3 Hz, 1H), 4.20 (d, *J* = 12.7 Hz, 1H), 3.86 (d, *J* = 12.7 Hz, 1H), 3.73 (dd, *J* = 7.2 Hz, 1H), 3.62 (d, *J* = 7.8 Hz, 1H), 2.21 – 2.08 (m, 2H), 2.05 (dd, *J* = 14.9, 2.1 Hz, 1H), 1.91 (dd, *J* = 14.9, 4.4 Hz, 1H), 1.86 – 1.76 (m, 1H), 1.65 (ddd, *J* = 10.9, 8.6, 3.8 Hz, 1H), 1.59 (s, 3H) ppm; <sup>13</sup>C

NMR (101 MHz, CDCl<sub>3</sub>)  $\delta$  170.5, 136.6, 128.9, 128.4, 127.6, 84.6, 75.2, 64.6, 62.9, 56.8, 41.9, 29.5, 26.8, 25.7 ppm; IR  $\nu_{\text{max}}$  2918, 1698, 1654, 1411, 1142 cm<sup>-1</sup>; HRMS–EI (m/z): [M]<sup>+</sup> calcd for C<sub>16</sub>H<sub>19</sub>NO<sub>3</sub>, 273.1365; found, 273.1363; Condition for culturing single crystal: 3 mg scale, dichloromethane : hexane = 1 : 4, static mixing, volatilization and crystallization at room temperature, CCDC 1875858.

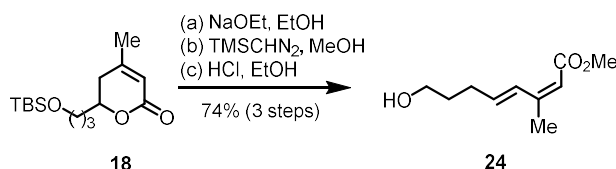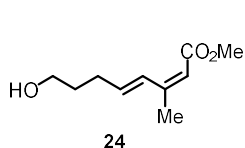

To a solution of lactone **18** (312 mg, 1.10 mmol, 1.0 equiv.) in ethanol (12 mL) was added sodium ethoxide (373.2 mg, 5.50 mmol, 5.0 equiv.) in one portion. The mixture was heated to reflux until NMR indicated there was no reactant left.

Then the solvent was evaporated and diluted by ethyl acetate (20 mL), washed with brine (2×10 mL), dried over Na<sub>2</sub>SO<sub>4</sub>, filtered and concentrated in vacuo to afford the crude product, which was dissolved by methanol (10 mL). After that, (trimethylsilyl)diazomethane (636 mg, 5.52 mmol, 5.0 equiv.) was added dropwise in 10 min at 0 °C, the mixture was stirred for 3 hours and directly concentrated in vacuo to get a yellowish oil. The crude product was then dissolved in ethanol (10 mL) and HCl (1% in ethanol, 10 mL) was added dropwise at room temperature. The mixture was stirred for another 30 min and quenched by saturated NaHCO<sub>3</sub> (5 mL), then it was extracted by ethyl acetate (80 mL), washed with brine (2×20 mL), dried over Na<sub>2</sub>SO<sub>4</sub>, filtered and concentrated in vacuo to afford the crude product, which was purified by silica gel column chromatography (10% to 30% ethyl acetate-petroleum ether) to give product **24** as colorless oil (150 mg, 74% for 3 steps); *R<sub>f</sub>* = 0.4 (30% ethyl acetate-petroleum ether); <sup>1</sup>H NMR (400 MHz, CDCl<sub>3</sub>)  $\delta$  7.59 (dq, *J* = 16.1, 1.4 Hz, 1H), 6.16 (dt, *J* = 15.8, 6.9 Hz, 1H), 5.62 (s, 1H), 3.70 – 3.65 (m, 5H), 2.35 – 2.27 (m, 2H), 1.99 (d, *J* = 1.3 Hz, 3H), 1.73 (tt, *J* = 7.3, 6.5 Hz, 2H) ppm; <sup>13</sup>C NMR (101 MHz, CDCl<sub>3</sub>)  $\delta$  166.8, 151.3, 138.1, 128.2, 115.6, 62.3, 50.9, 31.9, 29.6, 21.1 ppm; IR  $\nu_{\text{max}}$  3499, 2951, 1645, 1373, 665 cm<sup>-1</sup>; HRMS–EI (m/z): [M]<sup>+</sup> calcd for C<sub>10</sub>H<sub>16</sub>O<sub>3</sub>, 184.1099; found, 184.1102.

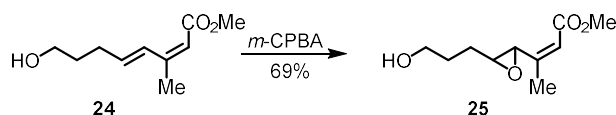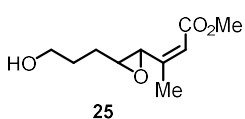

To a solution of diene **24** (102 mg, 0.55 mmol, 1.0 equiv.) in dichloromethane (1 mL) at 0 °C was added 3-chloroperoxybenzoic acid (280 mg, 1.22 mmol, 2.2 equiv.) in dichloromethane (5 mL) dropwise during 5 min. The mixture was

moved to room temperature and stirred for another 4 hours. Then the reaction was quenched by saturated Na<sub>2</sub>S<sub>2</sub>O<sub>3</sub> (2 mL), extracted by ethyl acetate (100 mL), washed with brine (2×20 mL), dried over Na<sub>2</sub>SO<sub>4</sub>,

filtered and concentrated in vacuo to afford the crude product, which was purified by silica gel column chromatography (20% to 30% ethyl acetate-petroleum ether) to give product **25** as colorless oil (76 mg, 69%);  $R_f$  = 0.3 (30% ethyl acetate-petroleum ether);  $^1\text{H}$  NMR (400 MHz,  $\text{CDCl}_3$ )  $\delta$  5.89 – 5.87 (m, 1H), 4.37 (d,  $J$  = 0.7 Hz, 1H), 3.73 – 3.65 (m, 5H), 2.93 (td,  $J$  = 5.3, 2.2 Hz, 1H), 1.84 – 1.74 (m, 4H), 1.73 (d,  $J$  = 1.4 Hz, 3H) ppm;  $^{13}\text{C}$  NMR (101 MHz,  $\text{CDCl}_3$ )  $\delta$  166.7, 156.1, 119.0, 61.9, 58.0, 57.2, 51.3, 28.7, 28.6, 18.6 ppm; IR  $\nu_{\text{max}}$  3411, 2951, 1726, 1252, 1060, 596  $\text{cm}^{-1}$ ; HRMS–ESI ( $m/z$ ):  $[\text{M}+\text{H}]^+$   $\text{C}_{10}\text{H}_{17}\text{O}_4$ , calcd for 201.1121; found, 201.1125.

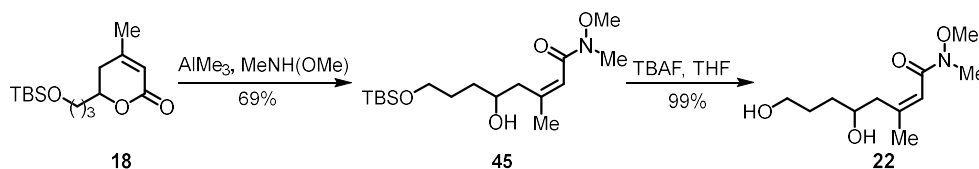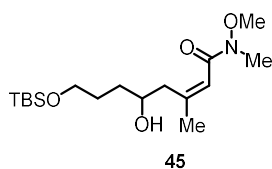

To a suspension of *N*, *O*-dimethylhydroxylamine hydrochloride (823 mg, 8.44 mmol, 5.0 equiv.) in dichloromethane (10 mL) was added trimethylaluminum (8.44 mL, 1 M in hexane, 5.0 equiv.) dropwise during 10 min at 0 °C. The mixture was moved to room temperature and stirred for 30 min which was then cooling to 0 °C and lactone **18** (480 mg, 1.69 mmol, 1.0 equiv.) in dichloromethane (10 mL) was added. The mixture was stirred for another 1 hour and saturated seignette salt solution (10 mL) was added to quench to reaction. Then the mixture was extracted by ethyl acetate (200 mL), washed with brine (2×30 mL), dried over  $\text{Na}_2\text{SO}_4$ , filtered and concentrated in vacuo to afford the crude product, which was purified by silica gel column chromatography (10% to 20% ethyl acetate-petroleum ether) to give product **45** as colorless oil (401 mg, 69%);  $R_f$  = 0.2 (30% ethyl acetate-petroleum ether);  $^1\text{H}$  NMR (400 MHz,  $\text{CDCl}_3$ )  $\delta$  6.27 (s, 1H), 4.85 (d,  $J$  = 6.3 Hz, 1H), 3.80 – 3.70 (m, 1H), 3.68 (s, 3H), 3.67 – 3.59 (m, 2H), 3.21 (s, 3H), 2.99 (dd,  $J$  = 12.3, 10.5 Hz, 1H), 2.17 (dd,  $J$  = 12.6, 2.8 Hz, 1H), 1.96 (d,  $J$  = 1.3 Hz, 3H), 1.74 – 1.51 (m, 4H), 0.88 (s, 9H), 0.04 (s, 6H) ppm;  $^{13}\text{C}$  NMR (101 MHz,  $\text{CDCl}_3$ )  $\delta$  168.4, 154.1, 117.2, 69.7, 63.4, 61.4, 41.6, 35.6, 29.0, 26.0, 25.7, 18.4, -5.3 ppm; IR  $\nu_{\text{max}}$  3428, 2742, 1724, 1254, 836, 663  $\text{cm}^{-1}$ ; HRMS–EI ( $m/z$ ):  $[\text{M}]^+$  calcd for  $\text{C}_{17}\text{H}_{35}\text{NO}_4\text{Si}$ , 345.2335; found, 345.2333.

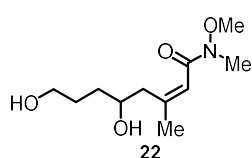

To a solution of siloxane **45** (179 mg, 0.52 mmol, 1.0 equiv.) in tetrahydrofuran (6 mL) was added tetrabutylammonium fluoride (0.78 mL, 1 M in tetrahydrofuran, 1.5 equiv.) dropwise during 2 min. The mixture was stirred at room temperature overnight and quenched with methanol.  $\text{CaCO}_3$  (259 mg, 2.59 mmol, 5.0 equiv.) together with ion exchange resin (259 mg) was added sequentially and stirred for another 10 min. Then the solution was filtered and concentrated in vacuo to afford the crude product, which was purified by silica gel column chromatography (50% to 100% ethyl acetate-petroleum ether) to give product **22** as colorless oil (121 mg, quantitative);  $R_f$  = 0.1 (75% ethyl acetate-petroleum ether);

$^1\text{H}$  NMR (400 MHz,  $\text{CDCl}_3$ )  $\delta$  6.29 (s, 1H), 5.53 (d,  $J = 5.2$  Hz, 1H), 3.78 (s, 1H), 3.72 – 3.60 (m, 5H), 3.21 (s, 3H), 3.07 – 2.99 (m, 1H), 2.14 (dd,  $J = 12.6, 2.8$  Hz, 1H), 1.97 (d,  $J = 1.3$  Hz, 3H), 1.80 – 1.70 (m, 2H), 1.70 – 1.64 (m, 1H), 1.63 – 1.55 (m, 1H) ppm;  $^{13}\text{C}$  NMR (101 MHz,  $\text{CDCl}_3$ )  $\delta$  168.4, 153.8, 117.4, 70.0, 63.0, 61.5, 41.9, 36.8, 32.2, 29.9, 25.7 ppm; IR  $\nu_{\text{max}}$  3458, 2853, 1648, 1456, 1057, 635  $\text{cm}^{-1}$ ; HRMS–EI ( $m/z$ ):  $[\text{M}]^+$  calcd for  $\text{C}_{11}\text{H}_{21}\text{NO}_4$ , 231.1471; found, 231.1475.

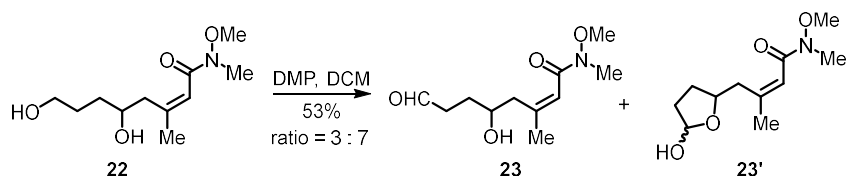

To a solution of Weinreb amide **22** (19 mg, 0.082 mmol, 1.0 equiv.) in dichloromethane (2 mL) was added Dess-Martin periodinane (69.7 mg, 0.164 mmol, 2.0 equiv.) in one portion at room temperature. The mixture was stirred for another 30 min.

Then the mixture was quenched by saturated  $\text{NaHCO}_3$  (aq.) and  $\text{Na}_2\text{S}_2\text{O}_3$  (aq.) and extracted with ethyl acetate (10 mL). The combined organic layer was washed with brine ( $3 \times 5$  mL), dried over  $\text{Na}_2\text{SO}_4$ , filtered and concentrated in vacuo to afford the crude product, which was purified by silica gel column chromatography (30% to 60% ethyl acetate-petroleum ether) to give product **23** and **23'** (mixture of aldehyde and hemiacetal, ratio = 3 : 7) as colorless oil (10 mg, 53%);  $R_f = 0.4$  (75% ethyl acetate-petroleum ether);  $^1\text{H}$  NMR (500 MHz,  $\text{CDCl}_3$ )  $\delta$  9.82 (s, 0.3H), 6.33 – 6.04 (m, 1H), 5.80 (s, 0.3H), 5.49 – 5.18 (m, 0.7H), 4.50 – 4.16 (m, 1H), 3.71 – 3.63 (m, 3H), 3.23 – 3.14 (m, 3H), 2.76 (dd,  $J = 7.8, 6.4$  Hz, 1H), 2.67 – 2.42 (m, 0H), 2.39 – 2.17 (m, 1H), 2.14 – 2.00 (m, 1H), 2.01 – 1.94 (m, 4H), 1.92 – 1.69 (m, 2H) ppm;  $^{13}\text{C}$  NMR (126 MHz,  $\text{CDCl}_3$ )  $\delta$  201.1, 164.8, 157.0, 116.4, 100.2, 100.0, 80.6, 80.5, 61.4, 61.4, 41.1, 39.2, 38.7, 37.5, 34.8, 32.9, 31.8, 29.8, 29.2, 26.9, 23.0 ppm.

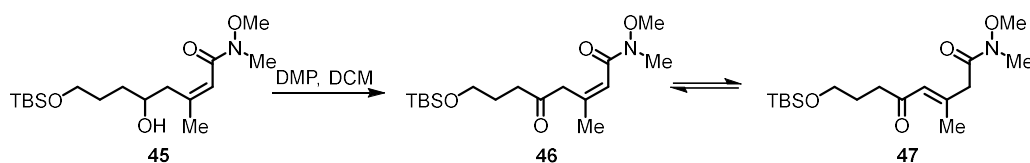

To a solution of alcohol **45** (800 mg, 2.32 mmol, 1.0 equiv.) in dichloromethane was added Dess-Martin periodinane (2.95 g, 6.95 mmol, 3.0 equiv.) in one portion followed by 50  $\mu\text{L}$  water dropwise which the reaction turned into white turbidity and stirred for another 1 hour at room temperature.

Then saturated  $\text{NaHCO}_3$  (aq.) and  $\text{Na}_2\text{S}_2\text{O}_3$  (aq.) was added to quench the reaction followed by extracted with ethyl acetate (80 mL), washed with brine ( $2 \times 30$  mL), dried over  $\text{Na}_2\text{SO}_4$ , filtered and concentrated in vacuo to afford the crude product, which was purified by silica gel column chromatography (5% to

10% ethyl acetate-petroleum ether) to give product **46** as colorless oil (395 mg, 50%);  $^1\text{H}$  NMR (400 MHz,  $\text{CDCl}_3$ )  $\delta$  6.32 (s, 1H), 3.80 (s, 2H), 3.68 (s, 3H), 3.60 (t,  $J$  = 6.3 Hz, 2H), 3.17 (s, 3H), 2.59 (t,  $J$  = 7.3 Hz, 2H), 1.93 (d,  $J$  = 1.5 Hz, 3H), 1.84 – 1.74 (m, 2H), 0.87 (s, 9H), 0.03 (s, 6H) ppm;  $^{13}\text{C}$  NMR (101 MHz,  $\text{CDCl}_3$ )  $\delta$  207.3, 167.1, 149.6, 116.3, 62.2, 61.5, 47.4, 39.0, 32.1, 26.7, 26.7, 25.9, 18.3, -5.4 ppm; IR  $\nu_{\text{max}}$  3798, 2361, 1657, 1258, 1098, 748  $\text{cm}^{-1}$ ; HRMS–EI ( $m/z$ ):  $[\text{M}]^+$  calcd for  $\text{C}_{17}\text{H}_{33}\text{NO}_4\text{Si}$ , 343.2179; found, 343.2173. Compounds **46** and **47** are isomerized interconversion between each other in solution.

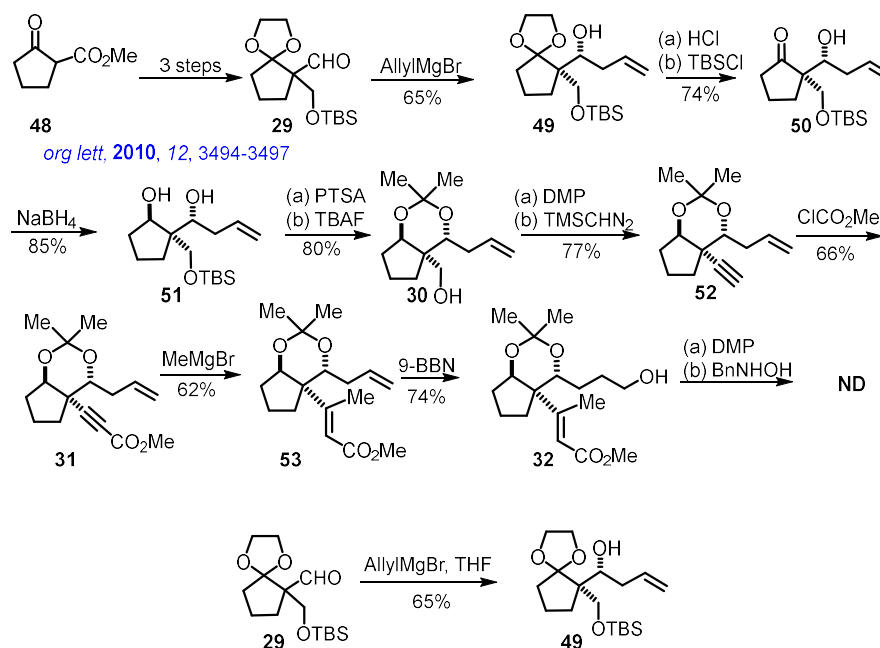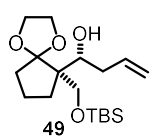

To a solution of aldehyde **29** (4.064 g, 13.53 mmol, 1.0 equiv.) in tetrahydrofuran (50 mL) was added allylmagnesium bromide (16.23 mL, 16.23 mmol, 1 M in tetrahydrofuran, 1.2 equiv.) dropwise at 0 °C during 30 min, the mixture was stirred at 0 °C for 2 hours. Then the reaction mixture was poured into pre-ice cold saturated  $\text{NH}_4\text{Cl}$  (aq.) and extracted with ethyl acetate (3×80 mL). The combined organic layer was washed with brine (3×100 mL), dried over  $\text{Na}_2\text{SO}_4$ , filtered and concentrated in vacuo to afford the crude product, which was purified by silica gel column chromatography (2% to 5% ethyl acetate-petroleum ether) to give product **49** as a yellowish oil (3 g, 65%);  $R_f$  = 0.3 (10% ethyl acetate-petroleum ether);  $^1\text{H}$  NMR (500 MHz,  $\text{CDCl}_3$ )  $\delta$  5.94 (ddt,  $J$  = 17.0, 10.1, 6.9 Hz, 1H), 5.14 – 4.98 (m, 2H), 4.05 – 3.91 (m, 2H), 3.93 – 3.82 (m, 4H), 3.60 (d,  $J$  = 10.4 Hz, 1H), 3.14 (d,  $J$  = 6.5 Hz, 1H), 2.37 – 2.20 (m, 2H), 1.84 – 1.68 (m, 4H), 1.64 – 1.57 (m, 2H), 0.89 (s, 9H), 0.06 (s, 6H) ppm;  $^{13}\text{C}$  NMR (126 MHz,  $\text{CDCl}_3$ )  $\delta$  137.6, 119.6, 115.9, 73.9, 64.3, 63.6, 63.5, 53.1, 38.0, 35.5, 29.7, 25.8, 19.0, 18.3, -5.6, -5.8 ppm; IR  $\nu_{\text{max}}$  2955, 1742, 1472, 1248, 837, 669  $\text{cm}^{-1}$ ; HRMS–ESI ( $m/z$ ):  $[\text{M}+\text{Na}]^+$   $\text{C}_{18}\text{H}_{34}\text{O}_4\text{NaSi}$ , calcd for 365.2119; found, 365.2112.



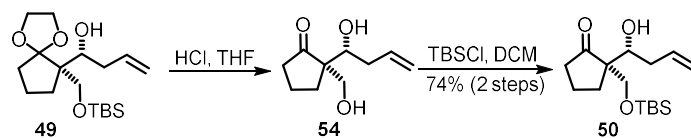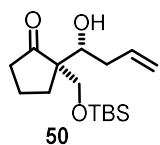

To a solution of ethylene glycol ketal **49** (1.55 g, 4.53 mmol, 1.0 equiv.) in tetrahydrofuran (15 mL) was added HCl (15 mL, 1 N in water) dropwise at 0 °C during 5 min, the mixture was stirred at room temperature for 2 hours and quenched with saturated NaHCO<sub>3</sub> (aq.). The reaction mixture was extracted with ethyl acetate (2×50 mL), the combined organic layer was washed with brine (3×20 mL), dried over Na<sub>2</sub>SO<sub>4</sub>, filtered and concentrated in vacuo to afford the crude product, which was redissolved in dichloromethane (40 mL). Imidazole (926 mg, 13.6 mmol, 3.0 equiv.) was added in one portion followed by dimethylaminopyridine (55.4 mg, 0.45 mmol, 0.1 equiv.) and *tert*-butyldimethylsilyl chloride (1.02 g, 6.8 mmol, 1.5 equiv.). The mixture was stirred at room temperature overnight and quenched by water (10 mL). Then the solution was extracted with ethyl acetate (2×50 mL), the combined organic layer was washed with brine (3×20 mL), dried over Na<sub>2</sub>SO<sub>4</sub>, filtered and concentrated in vacuo to afford the crude product, which was purified by silica gel column chromatography (2% to 5% ethyl acetate-petroleum ether) to give product **50** as a yellowish oil (1 g, 74% for 2 steps); *R*<sub>f</sub> = 0.8 (30% ethyl acetate-petroleum ether); <sup>1</sup>H NMR (400 MHz, CDCl<sub>3</sub>) δ 5.90 – 5.76 (m, 1H), 5.18 – 5.03 (m, 2H), 3.86 – 3.70 (m, 3H), 3.40 (s, 1H), 2.34 – 2.12 (m, 4H), 2.11 – 1.99 (m, 2H), 1.99 – 1.86 (m, 2H), 0.87 (s, 9H), 0.04 (d, *J* = 7.0 Hz, 6H) ppm; <sup>13</sup>C NMR (101 MHz, CDCl<sub>3</sub>) δ 135.4, 117.4, 74.6, 66.4, 57.5, 39.9, 37.1, 28.6, 25.8, 19.5, 18.1, -5.7, -5.8 ppm; IR ν<sub>max</sub> 3854, 2361, 1558, 1275, 837, 704 cm<sup>-1</sup>; HRMS–ESI (*m/z*): [M+H]<sup>+</sup> C<sub>16</sub>H<sub>31</sub>O<sub>3</sub>Si, calcd for 299.2037; found, 299.2034.

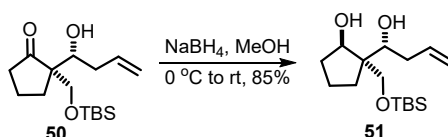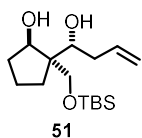

To a solution of ketone **50** (280 mg, 0.94 mmol, 1.0 equiv.) in methanol (10 mL) was added sodium borohydride (71 mg, 1.88 mmol, 2.0 equiv.) in batches. The mixture was then moved to room temperature and stirred for 2 hours. Water (5 mL) was added to quench the reaction, after that the solution was extracted with ethyl acetate (2×30 mL), the combined organic layer was washed with brine (3×10 mL), dried over Na<sub>2</sub>SO<sub>4</sub>, filtered and concentrated in vacuo to afford the crude product, which was purified by silica gel column chromatography (2% to 5% ethyl acetate-petroleum ether) to give product **51** as a colorless oil (239 mg, 85%); *R*<sub>f</sub> = 0.3 (10% ethyl acetate-petroleum ether); <sup>1</sup>H NMR (500 MHz, CDCl<sub>3</sub>) δ 5.98 – 5.85 (m, 1H), 5.13 (dd, *J* = 12.3, 6.0 Hz, 2H), 4.32 (t, *J* = 5.7 Hz, 1H), 3.85 (dd, *J* = 50.6, 10.2 Hz, 2H), 3.54 – 3.45 (m, 1H), 2.90 – 2.78 (m, 2H), 2.42 – 2.28 (m, 1H), 2.28 – 2.18 (m, 1H), 2.06 – 1.92 (m, 1H), 1.76

– 1.62 (m, 2H), 1.54 – 1.44 (m, 1H), 1.44 – 1.31 (m, 2H), 0.91 (s, 9H), 0.11 (d,  $J = 2.1$  Hz, 6H) ppm;  $^{13}\text{C}$  NMR (126 MHz,  $\text{CDCl}_3$ )  $\delta$  136.2, 117.3, 79.3, 77.9, 64.7, 51.9, 38.1, 33.7, 30.8, 25.8, 20.8, 18.0, – 5.7, –5.8 ppm; IR  $\nu_{\text{max}}$  3690, 2928, 2342, 1541, 1256, 669  $\text{cm}^{-1}$ ; HRMS–ESI ( $m/z$ ):  $[\text{M}+\text{H}]^+$   $\text{C}_{16}\text{H}_{33}\text{O}_3\text{Si}$ , calcd for 301.2193; found, 301.2190.

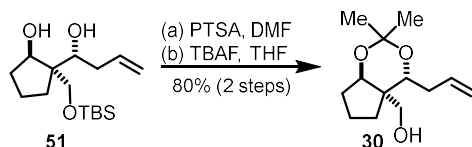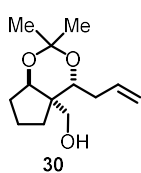

To a solution of the diol **51** (461 mg, 1.53 mmol, 1.0 equiv.) in dimethylformamide (15 mL) was added acetone dimethyl ketal (800 mg, 7.67 mmol, 5.0 equiv.) followed by *p*-toluene sulfonic acid monohydrate (15 mg, 0.08 mmol, 0.05 equiv.) in one portion. The mixture was stirred for 2 hours and quenched by saturated  $\text{NaHCO}_3$  (aq.), extracted with ethyl acetate (2×30 mL), the combined organic layer was washed with brine (3×10 mL), dried over  $\text{Na}_2\text{SO}_4$ , filtered and concentrated in vacuo to afford the crude product, which was redissolved in tetrahydrofuran (20 mL) and tetrabutylammonium fluoride (480 mg, 1.84 mmol, 1.2 equiv.) was added dropwise during 2 min. The mixture was heated to 60 °C and stirred for another 2 hours. Then the reaction was quenched by methanol and cooled to room temperature.  $\text{CaCO}_3$  (767 mg, 7.66 mmol, 5.0 equiv.) and resin (767 mg) was added and stirred for another 15 min. The mixture was filtered and concentrated in vacuo to afford the crude product, which was purified by silica gel column chromatography (10% to 20% ethyl acetate-petroleum ether) to give product **30** as a yellowish oil (277 mg, 80% for 2 steps);  $R_f = 0.2$  (20% ethyl acetate-petroleum ether);  $^1\text{H}$  NMR (500 MHz,  $\text{CDCl}_3$ )  $\delta$  5.90 – 5.78 (m, 1H), 5.17 – 4.96 (m, 2H), 3.95 (d,  $J = 11.9$  Hz, 1H), 3.82 – 3.72 (m, 2H), 3.63 (d,  $J = 11.9$  Hz, 1H), 2.52 – 2.43 (m, 1H), 2.41 – 2.32 (m, 2H), 1.96 – 1.89 (m, 1H), 1.82 – 1.61 (m, 3H), 1.47 (d,  $J = 18.9$  Hz, 6H), 1.12 – 1.03 (m, 1H) ppm;  $^{13}\text{C}$  NMR (126 MHz,  $\text{CDCl}_3$ )  $\delta$  135.2, 116.6, 100.7, 81.9, 78.8, 61.0, 45.0, 36.8, 29.6, 26.5, 25.4, 19.5, 17.4 ppm; IR  $\nu_{\text{max}}$  3649, 3077, 2359, 1558, 1267, 831  $\text{cm}^{-1}$ ; HRMS–ESI ( $m/z$ ):  $[\text{M}+\text{Na}]^+$   $\text{C}_{13}\text{H}_{22}\text{O}_3\text{Na}$ , calcd for 249.1461; found, 249.1458.

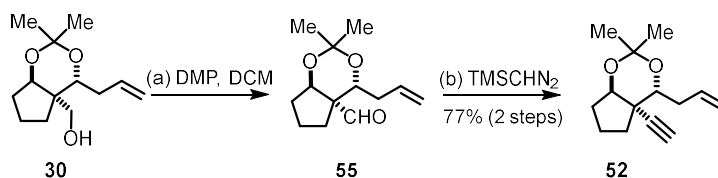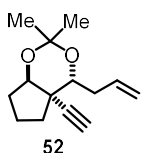

To a solution of acetone **30** (797 mg, 3.52 mmol, 1.0 equiv.) in dichloromethane (30 mL) was added  $\text{NaHCO}_3$  (1.48 g, 17.62 mmol, 5.0 equiv.) followed by Dess-Martin periodinane (1.79 g, 4.32 mmol, 1.2 equiv.) in one portion at room temperature. The mixture was stirred for another 30 min. Then the mixture was quenched by  $\text{Na}_2\text{S}_2\text{O}_3$  (aq.)

and extracted with ethyl acetate (100 mL). The combined organic layer was washed with brine (2×50 mL), dried over Na<sub>2</sub>SO<sub>4</sub>, filtered and concentrated in vacuo to afford the crude product **55**, which was used directly for next step without further purification.

To a solution of (trimethylsilyl)diazomethane (5.28 mL, 2 M in hexane, 3.0 equiv.) in tetrahydrofuran (15 mL) was added *n*-butyllithium (3.52 mL, 2.5 M in hexane, 2.5 equiv.) dropwise during 10 min at -78 °C. After stirring for another 10 min, the crude product of the aldehyde **55** in tetrahydrofuran (10 mL) was added dropwise during 5 min. The mixture was moved to room temperature after 15 min and stirred overnight. The reaction was quenched with saturated NH<sub>4</sub>Cl (aq., 10 mL) and extracted with ethyl acetate (2×50 mL), the combined organic layer was washed with brine (3×10 mL), dried over Na<sub>2</sub>SO<sub>4</sub>, filtered and concentrated in vacuo to afford the crude product, which was purified by silica gel column chromatography (5% to 10% ethyl acetate-petroleum ether) to give product **52** as a yellowish oil (600 mg, 77% for 2 steps); *R*<sub>f</sub> = 0.5 (10% ethyl acetate-petroleum ether); <sup>1</sup>H NMR (500 MHz, CDCl<sub>3</sub>) δ 5.90 – 5.77 (m, 1H), 5.14 (ddd, *J* = 17.2, 3.2, 1.7 Hz, 1H), 5.05 (d, *J* = 10.2 Hz, 1H), 3.63 (dd, *J* = 7.8, 5.4 Hz, 1H), 3.55 (dd, *J* = 11.0, 6.9 Hz, 1H), 2.59 – 2.48 (m, 1H), 2.45 – 2.36 (m, 1H), 2.18 (s, 1H), 2.00 – 1.80 (m, 4H), 1.70 – 1.60 (m, 1H), 1.52 (s, 3H), 1.45 (s, 3H), 1.42 – 1.32 (m, 1H) ppm; <sup>13</sup>C NMR (126 MHz, CDCl<sub>3</sub>) δ 134.5, 117.0, 100.5, 83.5, 78.6, 77.7, 72.6, 46.0, 37.3, 30.4, 29.7, 26.3, 19.8, 17.4 ppm; IR *v*<sub>max</sub> 3080, 2347, 1590, 1380, 1196, 841 cm<sup>-1</sup>; HRMS–ESI (*m/z*): [M+H]<sup>+</sup> C<sub>14</sub>H<sub>21</sub>O<sub>2</sub>, calcd for 221.1536; found, 221.1533.

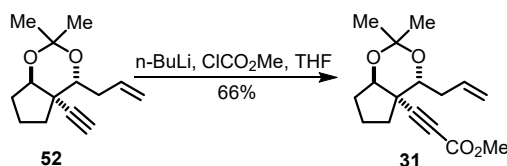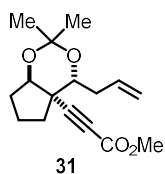

To a solution of alkyne **52** (600 mg, 2.72 mmol, 1.0 equiv.) in tetrahydrofuran (15 mL) was added *n*-butyllithium (4.36 mL, 2.5 M in hexane, 4.0 equiv.) dropwise during 5 min at -78 °C. After 10 min, methylchloroformate (2.06 g, 21.79 mmol, 8.0 equiv) was added dropwise during 2 min. The mixture was stirred at -78 °C for another 2 hours and quenched by saturated NaHCO<sub>3</sub> (aq.) and extracted with ethyl acetate (50 mL). The combined organic layer was washed with brine (3×10 mL), dried over Na<sub>2</sub>SO<sub>4</sub>, filtered and concentrated in vacuo to afford the crude product, which was purified by silica gel column chromatography (2% to 10% ethyl acetate-petroleum ether) to give product **31** as a colorless oil (500 mg, 66%); *R*<sub>f</sub> = 0.4 (10% ethyl acetate-petroleum ether); <sup>1</sup>H NMR (500 MHz, CDCl<sub>3</sub>) δ 5.84 (dddd, *J* = 17.2, 10.2, 7.9, 5.9 Hz, 1H), 5.17 (ddd, *J* = 17.2, 3.1, 1.6 Hz, 1H), 5.08 (d, *J* = 10.0 Hz, 1H), 3.78 (s, 3H), 3.69 (dd, *J* = 7.9, 5.4 Hz, 1H), 3.66 – 3.58 (m, 1H), 2.58 – 2.48 (m, 1H), 2.44 – 2.31 (m, 1H), 1.98 – 1.87 (m, 4H), 1.75 – 1.64 (m, 1H), 1.53 (s, 3H), 1.49 – 1.41 (m, 4H) ppm; <sup>13</sup>C NMR (126 MHz, CDCl<sub>3</sub>) δ 154.1, 134.1, 117.3, 100.7,

88.8, 78.3, 77.9, 76.9, 52.5, 46.8, 37.4, 29.9, 29.6, 26.4, 19.7, 17.3 ppm; IR  $\nu_{\text{max}}$  3852, 2359, 2230, 1715, 1248, 835  $\text{cm}^{-1}$ ; HRMS–ESI ( $m/z$ ):  $[M+H]^+$   $\text{C}_{16}\text{H}_{23}\text{O}_4$ , calcd for 279.1591; found, 279.1584.

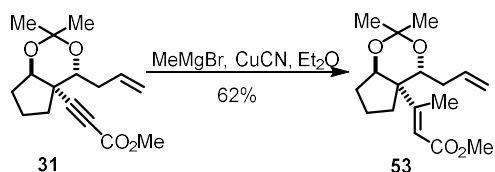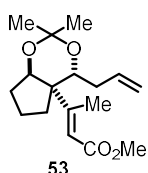

To a suspension of cuprous cyanide (334 mg, 3.73 mmol, 5.3 equiv.) in diethyl ether (5 mL) was added methyl magnesium bromide (2.35 mL, 3 M in diethyl ether, 10.0 equiv.) dropwise during 5 min at 0 °C. After 10 min, the mixture was moved to -20 °C and stirred for 10 min before methyl propiolate **31** (196 mg, 0.7 mmol, 1.0 equiv) in diethyl ether (4 mL) dropwise during 2 min. The reaction was stirred for another 2 hours and quenched by saturated  $\text{NH}_4\text{Cl}$  (aq.) at 0 °C, then extracted with ethyl acetate (50 mL). The combined organic layer was washed with brine ( $3 \times 10$  mL), dried over  $\text{Na}_2\text{SO}_4$ , filtered and concentrated in vacuo to afford the crude product, which was purified by silica gel column chromatography (2% to 4% ethyl acetate-petroleum ether) to give product **53** as a colorless oil (129 mg, 62%);  $R_f$  = 0.7 (10% ethyl acetate-petroleum ether);  $^1\text{H}$  NMR (500 MHz,  $\text{CDCl}_3$ )  $\delta$  6.46 (s, 1H), 5.79 (ddt,  $J$  = 17.0, 10.2, 6.7 Hz, 1H), 5.04 (ddt,  $J$  = 25.2, 16.5, 8.3 Hz, 2H), 3.78 – 3.72 (m, 2H), 3.69 (s, 3H), 2.32 (d,  $J$  = 0.9 Hz, 3H), 2.13 (dt,  $J$  = 14.3, 6.4 Hz, 2H), 2.02 (dd,  $J$  = 13.1, 8.1 Hz, 1H), 1.87 – 1.76 (m, 1H), 1.50 (d,  $J$  = 16.3 Hz, 6H), 1.44 – 1.36 (m, 2H), 1.34 – 1.23 (m, 2H) ppm;  $^{13}\text{C}$  NMR (126 MHz,  $\text{CDCl}_3$ )  $\delta$  167.5, 156.1, 135.1, 121.2, 116.7, 100.5, 81.3, 78.8, 50.8, 39.0, 37.2, 29.0, 25.7, 23.3, 19.3, 17.5, 14.1 ppm; IR  $\nu_{\text{max}}$  3883, 2932, 2361, 1466, 1192, 741  $\text{cm}^{-1}$ ; HRMS–ESI ( $m/z$ ):  $[M+\text{Na}]^+$   $\text{C}_{17}\text{H}_{26}\text{O}_4\text{Na}$ , calcd for 317.1723; found, 317.1716.

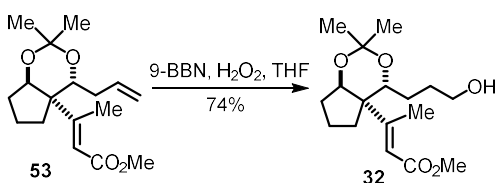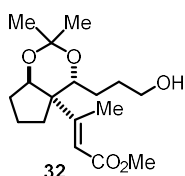

To the alkene **53** (100 mg, 0.34 mmol, 1.0 equiv.) was directly added was added 9-borabicyclo[3.3.1]nonane dimer (3.4 mL, 0.5 M in tetrahydrofuran, 1.70 mmol, 5.0 equiv.) dropwise at room temperature during 10 min. The mixture was stirred for another 5 hours. The solution was then moved to 0 °C and quenched by methanol (2 mL),  $\text{NaOH}$  (1.13 mL 3 M in water, 10.0 equiv.) was added and followed by the addition of hydrogen peroxide (0.4 mL, 30% in water) dropwise during 20 min. The solution was warmed to room temperature and extracted with ethyl acetate (50 mL). The combined organic layer was washed with brine ( $3 \times 10$  mL), dried over  $\text{Na}_2\text{SO}_4$ , filtered and concentrated in vacuo to afford the crude product,

which was purified by silica gel column chromatography (30% to 50% ethyl acetate-petroleum ether) to give product **32** as a colorless oil (78 mg, 74%);  $R_f$  = 0.3 (30% ethyl acetate-petroleum ether);  $^1\text{H}$  NMR (500 MHz,  $\text{CDCl}_3$ )  $\delta$  6.45 (s, 1H), 3.75 (dd,  $J$  = 11.8, 7.3 Hz, 1H), 3.72 – 3.66 (m, 4H), 3.61 (t,  $J$  = 5.9 Hz, 2H), 2.30 (d,  $J$  = 0.9 Hz, 3H), 2.01 (dt,  $J$  = 16.0, 7.9 Hz, 1H), 1.87 – 1.78 (m, 1H), 1.71 – 1.54 (m, 6H), 1.50 (d,  $J$  = 10.7 Hz, 6H), 1.42 – 1.34 (m, 1H), 1.25 – 1.11 (m, 1H) ppm;  $^{13}\text{C}$  NMR (126 MHz,  $\text{CDCl}_3$ )  $\delta$  167.4, 156.0, 121.1, 100.6, 82.1, 78.8, 62.6, 51.0, 50.8, 29.9, 29.4, 29.0, 28.9, 24.9, 19.3, 19.2, 17.5 ppm; IR  $\nu_{\text{max}}$  3725, 2359, 1715, 1155, 1121, 1007  $\text{cm}^{-1}$ ; HRMS–ESI ( $m/z$ ):  $[\text{M}+\text{Na}]^+$   $\text{C}_{17}\text{H}_{28}\text{O}_5\text{Na}$ , calcd for 335.1829; found, 335.1821.

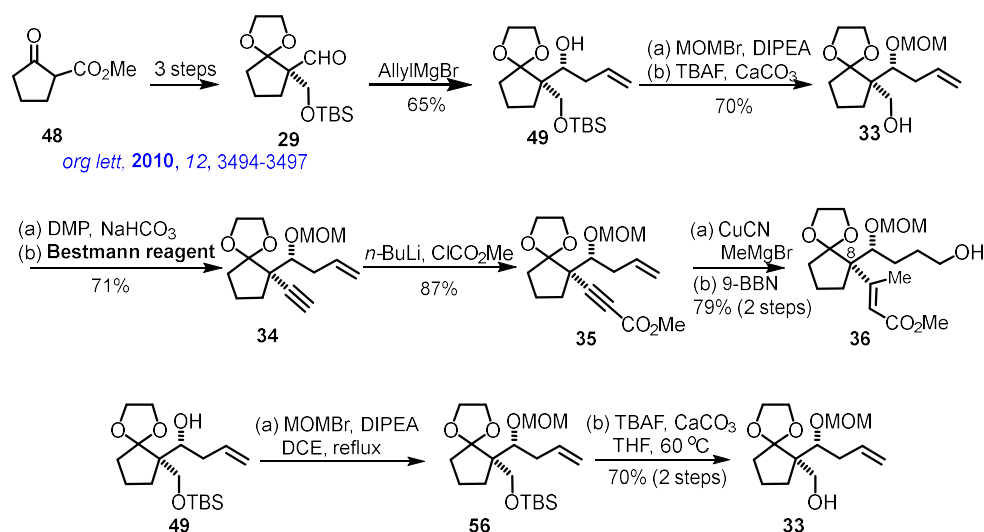

To a solution of alcohol **49** (1.77 g, 5.17 mmol, 1.0 equiv.) in 1,2-dichloroethane (40 mL) was added diisopropylethylamine (7.34 mL, 41.34 mmol, 8.0 equiv.) dropwise at 0 °C during 10 min, followed by addition of methoxymethyl bromide (1.69 mL, 20.67 mmol, 4.0 equiv.). The mixture was stirred and heated to reflux for 4 hours. Then the reaction mixture was poured into pre-ice cold saturated  $\text{NaHCO}_3$  (aq.) and extracted with ethyl acetate (200 mL). The combined organic layer was washed with brine (3×50 mL), dried over  $\text{Na}_2\text{SO}_4$ , filtered and concentrated in vacuo to afford the crude product **56** (2.0 g), which was used directly for next step without further purification.

To a solution of crude product **56** (2.0 g, crude product) in tetrahydrofuran (30 mL) was added tetrabutylammonium fluoride (7.76 mL, 1.0 M in tetrahydrofuran, 7.76 mmol, 1.5 equiv.) dropwise at room temperature during 10 min, the mixture was heated to 60 °C and stirred for 8 hours. Then methanol was added to quench the reaction followed by  $\text{CaCO}_3$  and ion exchange resin. The mixture was stirred at room temperature for another 15 min. Then filtered and concentrated to afford the crude product, which was purified by silica gel column chromatography (10% to 30% ethyl acetate-petroleum ether) to give product **33** as a yellow oil (1.155 g, 82% for 2 steps).  $R_f$  = 0.3 (30% ethyl acetate-

petroleum ether);  $^1\text{H}$  NMR (500 MHz,  $\text{CDCl}_3$ )  $\delta$  5.96 (dddd,  $J = 16.6, 10.1, 7.7, 6.4$  Hz, 1H), 5.10 (dq,  $J = 17.1, 1.7$  Hz, 1H), 5.02 (ddd,  $J = 10.1, 2.3, 1.1$  Hz, 1H), 4.70 (d,  $J = 6.5$  Hz, 1H), 4.67 (d,  $J = 6.6$  Hz, 1H), 4.05 – 3.91 (m, 2H), 3.94 – 3.84 (m, 2H), 3.83 (dd,  $J = 8.0, 3.0$  Hz, 1H), 3.76 – 3.66 (m, 2H), 3.38 (s, 3H), 3.21 (t,  $J = 6.5$  Hz, 1H), 2.56 (dddt,  $J = 14.5, 6.3, 3.0, 1.6$  Hz, 1H), 2.36 (dt,  $J = 14.5, 7.8, 1.2$  Hz, 1H), 1.87 – 1.71 (m, 3H), 1.64 – 1.53 (m, 2H), 1.44 (dt,  $J = 13.4, 6.7$  Hz, 1H) ppm;  $^{13}\text{C}$  NMR (126 MHz,  $\text{CDCl}_3$ )  $\delta$  137.0, 119.4, 116.1, 98.3, 81.1, 65.3, 64.3, 64.1, 56.1, 54.1, 38.2, 36.5, 29.5, 20.1 ppm; IR  $\nu_{\text{max}}$  3055, 1717, 1636, 1271, 1034, 739  $\text{cm}^{-1}$ ; HRMS–ESI ( $m/z$ ):  $[\text{M}+\text{Na}]^+$   $\text{C}_{14}\text{H}_{24}\text{O}_5\text{Na}$  calcd for 295.1516; found, 295.1513.

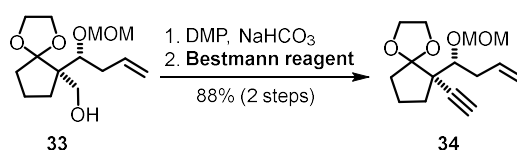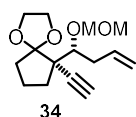

To a solution of MOM-protected alcohol **33** (1.155 g, 4.24 mmol, 1.0 equiv.) in dichloromethane (50 mL) was added  $\text{NaHCO}_3$  (1.78 g, 21.21 mmol, 5.0 equiv.) followed by Dess-Martin periodinane (2.16 g, 5.09 mmol, 1.2 equiv.) in one portion at room temperature. The mixture was stirred for another 30 min. Then the mixture was quenched by  $\text{Na}_2\text{S}_2\text{O}_3$  (aq.) and extracted with ethyl acetate (150 mL). The combined organic layer was washed with brine (3×50 mL), dried over  $\text{Na}_2\text{SO}_4$ , filtered and concentrated in vacuo to afford the crude product, which was used directly for next step without further purification.

To the solution of crude product in methanol (20 mL) was added potassium carbonate (2.94 g, 21.27 mmol, 5.0 equiv.) followed by Bestmann reagent (1-diazoacetylphosphonic acid dimethyl ester) (1.28 mL, 8.51 mmol, 2.0 equiv.) dropwise in 10 min. The mixture was stirred overnight at room temperature and turned into light blue. Then ethyl acetate (100 mL) was added and the combined organic layer was washed with brine (3×50 mL), dried over  $\text{Na}_2\text{SO}_4$ , filtered and concentrated in vacuo to afford the crude product, which was purified by silica gel column chromatography (10% to 20% ethyl acetate-petroleum ether) to give product **34** as a colorless oil (995 mg, 88%);  $R_f = 0.35$  (20% ethyl acetate-petroleum ether);  $^1\text{H}$  NMR (500 MHz,  $\text{CDCl}_3$ )  $\delta$  6.00 (ddt,  $J = 17.2, 10.1, 7.0$  Hz, 1H), 5.10 (dq,  $J = 17.1, 1.7$  Hz, 1H), 5.02 (ddt,  $J = 10.1, 2.2, 1.3$  Hz, 1H), 4.75 (d,  $J = 6.7$  Hz, 1H), 4.71 (d,  $J = 6.7$  Hz, 1H), 4.11 – 3.90 (m, 4H), 3.82 (dd,  $J = 6.8, 4.6$  Hz, 1H), 3.38 (s, 3H), 2.63 – 2.44 (m, 2H), 2.31 (s, 1H), 2.17 – 2.06 (m, 1H), 2.02 – 1.92 (m, 1H), 1.92 – 1.77 (m, 3H), 1.71 – 1.60 (m, 1H) ppm;  $^{13}\text{C}$  NMR (126 MHz,  $\text{CDCl}_3$ )  $\delta$  136.4, 118.1, 116.1, 97.5, 85.3, 80.1, 72.3, 64.7, 64.2, 56.0, 52.2, 38.2, 35.8, 34.5, 18.2 ppm; IR  $\nu_{\text{max}}$  3744, 3279, 2359, 1653, 1032, 743  $\text{cm}^{-1}$ ; HRMS–EI ( $m/z$ ):  $[\text{M}]^+$   $\text{C}_{15}\text{H}_{22}\text{O}_4$ , calcd for 266.1518; found 266.1520.

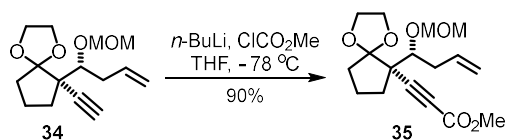

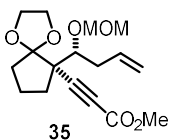
 To a solution of alkyne **34** (100 mg, 0.375 mmol, 1.0 equiv.) in tetrahydrofuran (5 mL) was added *n*-butyllithium (0.75 mL, 2.5 M in hexane, 5.0 equiv.) at -78 °C dropwise during 5 min. After stirring for 10 min, methylchloroformate (355 mg, 3.75 mmol, 10.0 equiv.) was added dropwise during 2 min. The mixture was stirred at -78 °C for another 2 hours and quenched by saturated NaHCO<sub>3</sub> (aq.) and extracted with ethyl acetate (20 mL). The combined organic layer was washed with brine (3×10 mL), dried over Na<sub>2</sub>SO<sub>4</sub>, filtered and concentrated in vacuo to afford the crude product, which was purified by silica gel column chromatography (10% to 20% ethyl acetate-petroleum ether) to give product **35** as a colorless oil (110 mg, 90%); *R<sub>f</sub>* = 0.4 (20% ethyl acetate-petroleum ether); <sup>1</sup>H NMR (500 MHz, CDCl<sub>3</sub>) δ 5.99 (ddt, *J* = 17.1, 10.1, 7.0 Hz, 1H), 5.11 (ddd, *J* = 17.1, 3.3, 1.6 Hz, 1H), 5.05 (dd, *J* = 10.1, 1.8 Hz, 1H), 4.73 (dd, *J* = 20.0, 6.7 Hz, 2H), 4.09 – 4.01 (m, 2H), 3.99 – 3.91 (m, 2H), 3.81 (dd, *J* = 6.6, 4.5 Hz, 1H), 3.75 (s, 3H), 3.39 (s, 3H), 2.59 – 2.47 (m, 2H), 2.13 – 2.00 (m, 2H), 1.94 – 1.77 (m, 3H), 1.72 – 1.61 (m, 1H) ppm; <sup>13</sup>C NMR (126 MHz, CDCl<sub>3</sub>) δ 154.2, 135.9, 118.1, 116.6, 97.5, 90.2, 80.0, 76.4, 64.9, 64.6, 56.1, 52.9, 52.5, 38.1, 35.3, 35.1, 18.6 ppm; IR *v*<sub>max</sub> 3725, 2342, 1717, 1267, 1038, 741 cm<sup>-1</sup>; HRMS–ESI (*m/z*): [M+Na]<sup>+</sup> C<sub>17</sub>H<sub>24</sub>O<sub>6</sub>Na calcd for 347.1465; found, 347.1460.

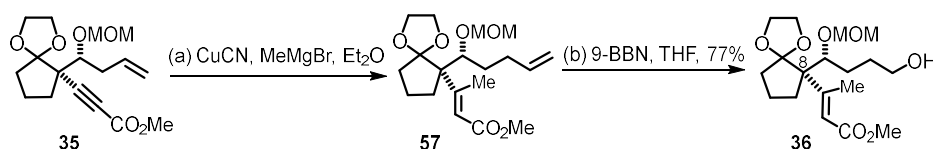

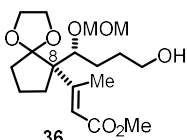
 To a suspension of cuprous cyanide (803 mg, 8.97 mmol, 5.3 equiv.) in diethyl ether was added methyl magnesium bromide (5.64 mL, 3 M in diethyl ether, 10.0 equiv.) dropwise during 5 min at 0 °C. After stirring for 10 min, the mixture was moved to -20 °C and stirred for 10 min before methyl propiolate **35** (549 mg, 1.69 mmol, 1.0 equiv) in diethyl ether (5 mL) dropwise during 2 min. The reaction was stirred for another 2 hours and quenched by saturated NH<sub>4</sub>Cl (aq.) at 0 °C, then diluted with ethyl acetate (50 mL). The combined organic layer was washed with brine (3×10 mL), dried over Na<sub>2</sub>SO<sub>4</sub>, filtered and concentrated in vacuo to afford the crude product **57** (600 mg), which was used to next step without further purification.

To the crude product **57** (600 mg) was directly added was added 9-borabicyclo[3.3.1]nonane dimer (16.9 mL, 0.5 M in tetrahydrofuran, 8.46 mmol, 5.0 equiv.) dropwise at room temperature during 10 min. The mixture was stirred for another 5 hours. The solution was then moved to 0 °C and quenched by methanol (3 mL), NaOH (5.6 mL 3 M in water, 10.0 equiv.) was added and followed by the addition of

hydrogen peroxide (2 mL, 30% in water) dropwise during 20 min. The solution was warmed to room temperature and extracted with ethyl acetate (100 mL). The combined organic layer was washed with brine (3×20 mL), dried over Na<sub>2</sub>SO<sub>4</sub>, filtered and concentrated in vacuo to afford the crude product, which was purified by silica gel column chromatography (30% to 50% ethyl acetate-petroleum ether) to give product **36** as a colorless oil (465 mg, 77% for 2 steps); *R*<sub>f</sub> = 0.4 (50% ethyl acetate-petroleum ether); <sup>1</sup>H NMR (500 MHz, CDCl<sub>3</sub>) δ 5.92 (d, *J* = 0.9 Hz, 1H), 4.59 (dd, *J* = 28.3, 6.7 Hz, 2H), 3.98 (dd, *J* = 8.0, 3.5 Hz, 1H), 3.95 – 3.82 (m, 4H), 3.73 – 3.61 (m, 5H), 3.35 (s, 3H), 2.28 (d, *J* = 1.0 Hz, 3H), 2.06 (ddd, *J* = 9.1, 7.5, 4.6 Hz, 1H), 1.96 – 1.60 (m, 8H), 1.54 – 1.48 (m, 1H) ppm; <sup>13</sup>C NMR (126 MHz, CDCl<sub>3</sub>) δ 167.3, 161.2, 118.9, 117.4, 98.4, 82.2, 63.9, 63.4, 62.7, 60.9, 55.9, 50.8, 34.9, 30.9, 29.9, 29.5, 18.5, 18.3 ppm; IR ν<sub>max</sub> 2359, 2342, 1717, 1150, 1030, 741 cm<sup>-1</sup>; HRMS–EI (*m/z*): [*M*]<sup>+</sup> calcd for C<sub>18</sub>H<sub>30</sub>O<sub>7</sub>, 358.1992; found, 358.1995.

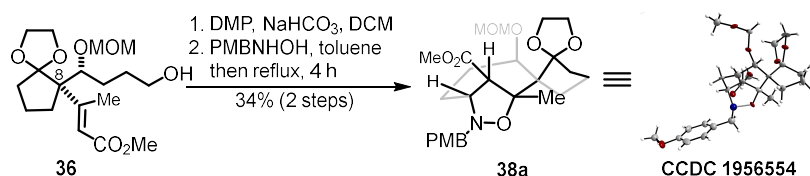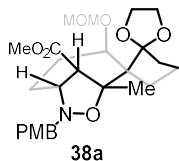

To a solution of α, β-unsaturated ester **36** (323 mg, 0.90 mmol, 1.0 equiv.) in dichloromethane (10 mL) was added NaHCO<sub>3</sub> (379 mg, 4.51 mmol, 5.0 equiv.) followed by Dess-Martin periodinane (459 mg, 1.08 mmol, 1.2 equiv.) in one portion at room temperature. The mixture was stirred for another 30 min. Then the mixture was quenched by Na<sub>2</sub>S<sub>2</sub>O<sub>3</sub> (aq, 10 mL) and extracted with Ethyl acetate (50 mL). The combined organic layer was washed with brine (3×20 mL), dried over Na<sub>2</sub>SO<sub>4</sub>, filtered and concentrated in vacuo to afford the crude product, which was used directly for next step without further purification.

To a solution of crude product aldehyde in toluene was added Na<sub>2</sub>SO<sub>4</sub> (386 mg, 2.72 mmol, 3.0 equiv.) followed by *N*-(4-methoxybenzyl)-hydroxylamine (278 mg, 1.81 mmol, 2.0 equiv.) in one portion. The mixture was stirred at room temperature overnight until all the amine hydrochloride was dissolved to get a clarified solution. Then the solution was filtered and concentrated as a yellowish oil which was redissolved by toluene (20 mL) and heated to reflux at least 8 hours. The mixture was concentrated to afford the crude product, which was purified by silica gel column chromatography (20% to 30% ethyl acetate-petroleum ether) to give product **38a** as yellowish powder (150 mg, 34% for 2 steps); *R*<sub>f</sub> = 0.4 (30% ethyl acetate-petroleum ether); <sup>1</sup>H NMR (333K, 500 MHz, CDCl<sub>3</sub>) δ 7.37 (d, *J* = 8.4 Hz, 2H), 6.84 (d, *J* = 8.6 Hz, 2H), 4.66 (s, 2H), 4.30 (d, *J* = 12.4 Hz, 1H), 4.18 (d, *J* = 12.4 Hz, 1H), 4.08 (s, 1H), 4.01 – 3.82 (m, 4H), 3.79 (s, 3H), 3.76 (d, *J* = 3.5 Hz, 1H), 3.74 (s, 3H), 2.30 – 2.14 (m, 2H), 2.10 – 2.00 (m, 2H), 1.83 – 1.67 (m, 4H), 1.65 (s, 4H), 1.63 – 1.48 (m, 5H) ppm; <sup>13</sup>C NMR (333K, 126 MHz, CDCl<sub>3</sub>) δ 174.4, 158.8, 131.0, 130.3, 128.5, 119.9, 114.4, 113.7, 98.4, 83.9, 64.6, 64.1, 63.7, 60.8, 60.5,



56.6, 56.4, 55.4, 55.3, 51.5, 38.6, 33.3, 29.7, 26.8, 25.2, 21.0 ppm; IR  $\nu_{\text{max}}$  3734, 3055, 2461, 1541, 1623, 704  $\text{cm}^{-1}$ ; HRMS–EI ( $m/z$ ):  $[M]^+$  calcd for  $\text{C}_{26}\text{H}_{37}\text{NO}_8$ , 491.2519; found, 491.2524; Conditions for culturing single crystal: 3 mg scale, petroleum ether, static mixing, volatilization and crystallization at room temperature, CCDC 1956554.

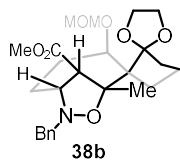

7-*endo* cycloadduct **38b** was synthesized through the conversion similar to **38a** in 30% yield for 2 steps.  $^1\text{H}$  NMR (500 MHz,  $\text{CDCl}_3$ )  $\delta$  7.49 – 7.44 (m, 2H), 7.30 (t,  $J = 7.6$  Hz, 2H), 7.26 – 7.19 (m, 1H), 4.74 – 4.59 (m, 2H), 4.37 (d,  $J = 12.6$  Hz, 1H), 4.25 (d,  $J = 12.3$  Hz, 1H), 4.01 – 3.91 (m, 2H), 3.91 – 3.81 (m, 3H), 3.76 (s, 1H), 3.74 (s, 3H), 3.39 (s, 3H), 2.30 – 2.13 (m, 2H), 2.10 – 1.96 (m, 1H), 1.84 – 1.68 (m, 4H), 1.68 – 1.48 (m, 7H) ppm;  $^{13}\text{C}$  NMR (126 MHz,  $\text{CDCl}_3$ )  $\delta$  174.4, 138.6, 129.1, 128.1, 126.8, 119.7, 98.3, 83.8, 63.7, 56.6, 56.2, 51.8, 42.8, 42.3, 38.6, 33.2, 26.8, 21.0 ppm; IR  $\nu_{\text{max}}$  3649, 2947, 1697, 1449, 912, 731  $\text{cm}^{-1}$ ; HRMS–EI ( $m/z$ ):  $[M]^+$  calcd for  $\text{C}_{25}\text{H}_{35}\text{NO}_7$ , 461.2414; found, 461.2419.

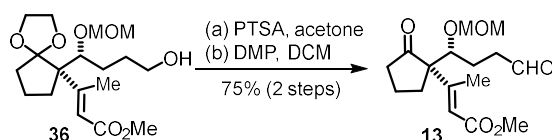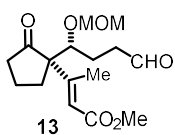

To a solution of ethylene  $\alpha$ ,  $\beta$ -unsaturated ester **36** (216 mg, 0.603 mmol, 1.0 equiv.) in acetone (5 mL) was added *p*-toluene sulfonic acid monohydrate (229 mg, 1.21 mmol, 2.0 equiv.) in one portion at room temperature. The mixture was stirred for 2 hours and quenched by saturated  $\text{NaHCO}_3$  (aq.), extracted with ethyl acetate (20 mL), washed with brine (3 $\times$ 5 mL), dried over  $\text{Na}_2\text{SO}_4$ , filtered and concentrated in vacuo to afford the crude product, which was redissolved by dichloromethane (5 mL) followed by the addition of  $\text{NaHCO}_3$  (253 mg, 3.01 mmol, 5.0 equiv.) and Dess-Martin periodinane (307 mg, 0.723 mmol, 1.2 equiv.) in one portion at room temperature. The mixture was stirred for another 30 min. Then the mixture was quenched by  $\text{Na}_2\text{S}_2\text{O}_3$  (aq., 5 mL) and extracted with ethyl acetate (20 mL). The combined organic layer was washed with brine (3 $\times$ 5 mL), dried over  $\text{Na}_2\text{SO}_4$ , filtered and concentrated in vacuo to afford the crude product, which was purified by silica gel column chromatography (10% to 20% ethyl acetate-petroleum ether) to give product **13** as a colorless oil (141 mg, 75% for 2 steps);  $R_f = 0.5$  (30% ethyl acetate-petroleum ether);  $^1\text{H}$  NMR (500 MHz,  $\text{CDCl}_3$ )  $\delta$  9.75 (s, 1H), 5.83 (d,  $J = 1.1$  Hz, 1H), 4.54 (dd,  $J = 17.1, 6.9$  Hz, 2H), 3.81 (dd,  $J = 9.5, 2.5$  Hz, 1H), 3.68 (s, 3H), 3.33 (s, 3H), 2.67 – 2.50 (m, 2H), 2.37 – 2.25 (m, 2H), 2.22 (d,  $J = 1.1$  Hz, 3H), 2.21 – 2.12 (m, 2H), 2.10 – 1.99 (m, 1H), 1.94 (tdd,  $J = 12.3, 6.4, 3.0$  Hz, 1H), 1.77 – 1.65 (m, 2H) ppm;  $^{13}\text{C}$  NMR (126 MHz,  $\text{CDCl}_3$ )  $\delta$  216.9, 201.9, 166.6, 155.0, 118.8, 98.5, 82.9, 64.6, 56.1, 51.1, 40.9, 39.0, 30.5, 24.6, 18.8, 16.2 ppm; IR  $\nu_{\text{max}}$  3726, 2361, 1356, 1215, 1026  $\text{cm}^{-1}$ ; HRMS–ESI ( $m/z$ ):  $[M+\text{Na}]^+$   $\text{C}_{16}\text{H}_{24}\text{O}_6\text{Na}$  calcd for 335.1465; found, 335.1456.

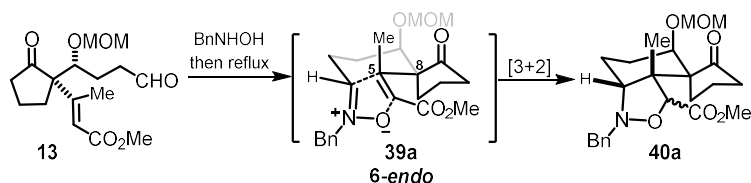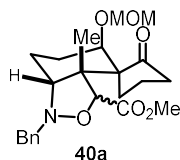

To a solution of aldehyde **13** (34.5 mg, 0.11 mmol, 1.0 equiv.) in toluene (5 mL) was added NaHCO<sub>3</sub> (361 mg, 0.33 mmol, 3.0 equiv.) followed by *N*-benzylhydroxylamine hydrochloride (18.5 mg, 0.12 mmol, 1.1 equiv.) in one portion. The mixture was stirred at room temperature overnight until all the amine hydrochloride was dissolved to get a

clarified solution. Then the solution was filtered and concentrated as a greenish oil which was redissolved by toluene (5 mL) and heated to reflux at least 8 hours. The mixture was concentrated to afford the crude product, which was purified by silica gel column chromatography (10% to 20% ethyl acetate-petroleum ether) to give product **40a** as yellowish powder (20 mg, 43%), a mixture of epimers, d.r = 3.4 : 1; *R<sub>f</sub>* = 0.5 (30% ethyl acetate-petroleum ether); The major product: <sup>1</sup>H NMR (500 MHz, CDCl<sub>3</sub>) δ 7.50 – 7.30 (m, 5H), 4.75 (d, *J* = 7.0 Hz, 1H), 4.62 (d, *J* = 7.0 Hz, 1H), 4.42 (s, 1H), 4.16 (d, *J* = 14.3 Hz, 1H), 3.96 (d, *J* = 14.3 Hz, 1H), 3.93 – 3.82 (m, 1H), 3.78 (s, 3H), 3.40 (s, 3H), 2.60 (dt, *J* = 13.4, 9.0 Hz, 1H), 2.46 – 2.34 (m, 2H), 2.33 – 2.22 (m, 1H), 2.20 – 1.86 (m, 7H), 1.80 (s, 1H), 1.25 (s, 3H) ppm; <sup>13</sup>C NMR (126 MHz, CDCl<sub>3</sub>) δ 173.9, 137.5, 128.8, 128.2, 127.9, 127.0, 126.9, 95.3, 62.0, 56.8, 56.4, 55.9, 51.9, 41.5, 32.8, 32.4, 28.5, 23.3, 20.2, 19.5 ppm; IR ν<sub>max</sub> 3734, 2342, 1624, 1541, 1031, 748 cm<sup>-1</sup>; HRMS–ESI (*m/z*): [*M*+*H*]<sup>+</sup> C<sub>23</sub>H<sub>32</sub>O<sub>6</sub>N, calcd for 418.2224; found, 418.2213.

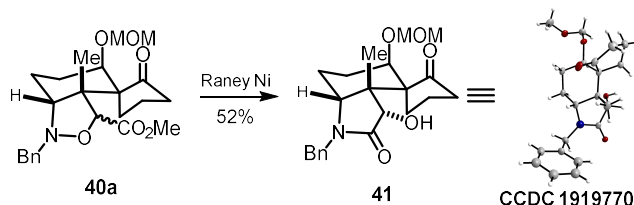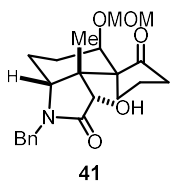

To a solution of isoxazolidine **40a** (38 mg) in methanol (5 mL) was added Raney Nickel (30 mg) in one portion. The mixture was protected by a hydrogen balloon and stirred at room temperature overnight. Then the solution was filtered and concentrated to afford the crude product, which was purified by silica gel column chromatography

(30% to 50% ethyl acetate-petroleum ether) to give product **41** as white solid (18 mg, 52%); *R<sub>f</sub>* = 0.1 (30% ethyl acetate-petroleum ether); <sup>1</sup>H NMR (500 MHz, CDCl<sub>3</sub>) δ 7.37 – 7.19 (m, 5H), 4.91 (d, *J* = 14.7 Hz, 1H), 4.69 – 4.59 (m, 2H), 4.28 (dd, *J* = 11.6, 4.5 Hz, 1H), 4.22 (d, *J* = 3.6 Hz, 1H), 3.99 (d, *J* = 14.7 Hz, 1H), 3.76 (d, *J* = 3.6 Hz, 1H), 3.42 – 3.25 (m, 4H), 2.51 – 2.39 (m, 1H), 2.38 – 2.20 (m, 2H), 2.19 – 1.97 (m, 4H), 1.90 (s, 1H), 1.84 – 1.75 (m, 1H), 0.75 (s, 3H) ppm; <sup>13</sup>C NMR (126 MHz, CDCl<sub>3</sub>) δ 222.7, 173.7, 135.9, 128.7, 128.4, 127.8, 96.1, 82.9, 78.7, 61.6, 56.0, 55.7, 45.6, 44.7, 41.4, 32.3, 28.3,

24.1, 20.8, 20.6 ppm; IR  $\nu_{\text{max}}$  3737, 2361, 1730, 1653, 1032, 750  $\text{cm}^{-1}$ ; HRMS–EI ( $m/z$ ):  $[\text{M}]^+$  calcd for  $\text{C}_{22}\text{H}_{29}\text{NO}_5$ , 387.2046; found, 387.2049; Conditions for culturing single crystal: 4 mg scale, ethyl acetate : hexane = 1 : 4, static mixing, volatilization and crystallization at room temperature, CCDC 1919770.

### Scheme 1. [3+2] cycloaddition of the alkenyl bromine substrate

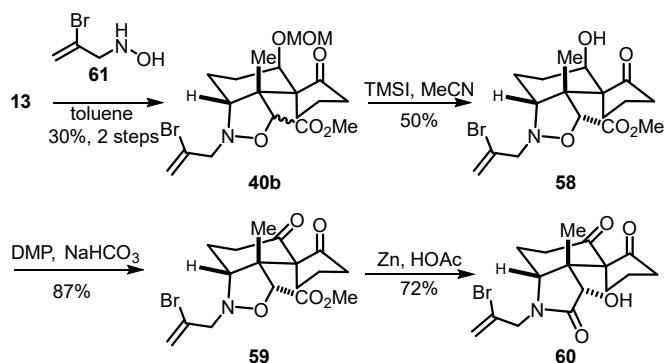

The N-alkenyl bromine substrate was also introduced to the [3+2] cycloaddition which would be a significant intermediate to construct the hydrogenated pyridine B ring. Aldehyde **13**, which condensed with hydroxylamine and heated to undergo 6-*endo* cycloaddition to generate **40b**. Removed the MOM-protecting group and oxidized by Dess-Martin Periodinane to generate the corresponding ketone in 87% yield. Reductive cleavage of the N-O bond of isoxazolidine **59** using Zn/HOAc furnished tricyclic product **60** which would be a highly effective product for the subsequent synthesis.

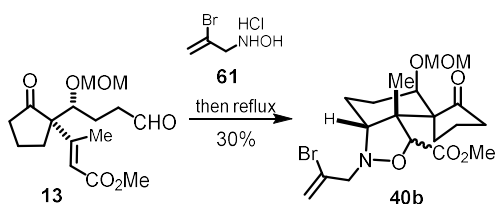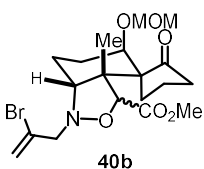

To a solution of aldehyde **13** (213 mg, 0.68 mmol, 1.0 equiv.) in toluene (10 mL) was added  $\text{NaHCO}_3$  (172 mg, 2.05 mmol, 3.0 equiv.) followed by hydroxylamine hydrochloride **61** (154 mg, 0.82 mmol, 1.2 equiv.) in one portion. The mixture was stirred at room temperature overnight until all the amine hydrochloride was dissolved to get a clarified solution. Then the solution was filtered and concentrated as a yellowish oil which was redissolved by toluene (20 mL) and heated to reflux at least 8 hours. The mixture was concentrated to afford the crude product, which was purified by silica gel column chromatography (10% to 20% ethyl acetate-petroleum ether) to give product **40b** as yellowish powder (92 mg, 30%), a mixture of epimers, d.r = 2 : 1;  $R_f$  = 0.3 (10% ethyl acetate-petroleum ether); The major product:  $^1\text{H}$  NMR (500

MHz, CDCl<sub>3</sub>)  $\delta$  6.33 (s, 1H), 5.69 – 5.63 (m, 1H), 4.75 (d,  $J$  = 7.0 Hz, 1H), 4.61 (d,  $J$  = 7.0 Hz, 1H), 4.40 (s, 1H), 3.89 – 3.82 (m, 1H), 3.78 (s, 3H), 3.69 – 3.56 (m, 3H), 3.40 (s, 3H), 2.65 – 2.34 (m, 3H), 2.20 – 2.10 (m, 2H), 2.01 – 1.85 (m, 3H), 1.76 – 1.67 (m, 2H), 1.21 (s, 3H) ppm; <sup>13</sup>C NMR (126 MHz, CDCl<sub>3</sub>)  $\delta$  221.5, 173.8, 130.0, 128.4, 127.0, 118.5, 96.4, 80.2, 66.0, 56.8, 56.3, 56.0, 52.0, 41.4, 32.6, 28.1, 23.1, 20.2, 19.5 ppm; IR  $\nu_{\max}$  3726, 2953, 2342, 1251, 839, 781 cm<sup>-1</sup>; HRMS–ESI ( $m/z$ ): [M+H]<sup>+</sup> C<sub>19</sub>H<sub>29</sub>BrNO<sub>6</sub>, calcd for 446.1173; found, 446.1167.

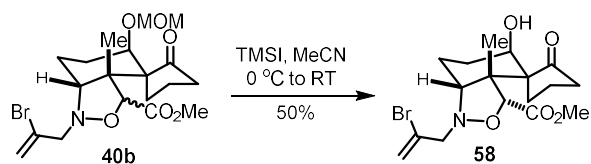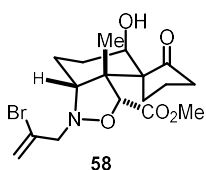

To a solution of isoxazolidine **40b** (129 mg, 0.29 mmol, 1.0 equiv.) in acetonitrile (5 mL) at 0 °C was added NaI (173 mg, 1.16 mmol, 4.0 equiv.) followed by trimethylchlorosilane (94 mg, 0.87 mmol, 3.0 equiv.) dropwise in 2 min. The mixture was warmed to room temperature after 10 min and stirred for another 2

hours. Then the solution was extracted by ethyl acetate (20 mL), washed by Na<sub>2</sub>S<sub>2</sub>O<sub>3</sub> (2×5 mL) and brine (2×5 mL), dried over Na<sub>2</sub>SO<sub>4</sub>, filtered and concentrated in vacuo to afford the crude product, which was purified by silica gel column chromatography (20% to 30% ethyl acetate-petroleum ether) to give product **59** as yellowish powder (58 mg, 50%);  $R_f$  = 0.4 (30% ethyl acetate-petroleum ether); <sup>1</sup>H NMR (500 MHz, CDCl<sub>3</sub>)  $\delta$  6.30 (s, 1H), 5.63 (d,  $J$  = 1.5 Hz, 1H), 4.72 (d,  $J$  = 7.0 Hz, 1H), 4.59 (d,  $J$  = 7.0 Hz, 1H), 4.37 (s, 1H), 3.86 – 3.79 (m, 1H), 3.76 (s, 3H), 3.63 – 3.56 (m, 3H), 3.38 (s, 3H), 2.62 – 2.32 (m, 3H), 2.16 – 2.06 (m, 2H), 1.97 – 1.85 (m, 3H), 1.76 – 1.64 (m, 2H), 1.18 (s, 3H) ppm; <sup>13</sup>C NMR (126 MHz, CDCl<sub>3</sub>)  $\delta$  171.8, 118.2, 52.0, 41.2, 32.6, 19.6, 19.2, 18.1 ppm; The major product: IR  $\nu_{\max}$  3736, 2926, 1460, 1248, 1045, 897 cm<sup>-1</sup>; HRMS–ESI ( $m/z$ ): [M+H]<sup>+</sup> C<sub>17</sub>H<sub>25</sub>BrO<sub>5</sub>N, calcd for 402.0911; found, 402.0905.

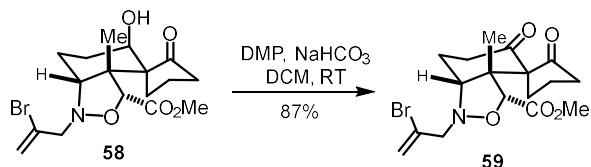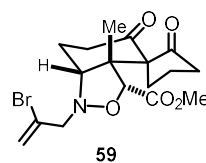

To a solution of isoxazolidine **58** (30 mg, 0.055 mmol, 1.0 equiv) in dichloromethane (5 mL) was added NaHCO<sub>3</sub> (23.3 mg, 0.277 mmol, 5.0 equiv.) and Dess-Martin periodinane (47 mg, 0.11 mmol, 2.0 equiv.) in one potion at room

temperature. The mixture was stirred for another 30 min. Then the mixture was quenched by Na<sub>2</sub>S<sub>2</sub>O<sub>3</sub> (aq.) (5 mL) and extracted with ethyl acetate (20 mL). The combined organic layer was washed with brine (3×5 mL), dried over Na<sub>2</sub>SO<sub>4</sub>, filtered and concentrated in vacuo to afford

the crude product, which was purified by silica gel column chromatography (10% to 20% ethyl acetate-petroleum ether) to give product **59** as a colorless oil (26 mg, 87%).  $R_f = 0.5$  (10% ethyl acetate-petroleum ether);  $^1\text{H}$  NMR (400 MHz,  $\text{CDCl}_3$ )  $\delta$  5.98 (s, 1H), 5.59 (p,  $J = 1.0$  Hz, 1H), 4.18 (s, 1H), 3.75 (s, 3H), 3.64 (s, 2H), 3.11 – 2.88 (m, 2H), 2.75 (ddt,  $J = 13.2, 6.6, 2.0$  Hz, 1H), 2.57 (dd,  $J = 10.8, 7.3$  Hz, 1H), 2.44 – 2.29 (m, 2H), 2.25 – 2.09 (m, 2H), 2.02 – 1.78 (m, 2H), 1.29 – 1.23 (m, 1H), 1.20 (s, 3H) ppm;  $^{13}\text{C}$  NMR (126 MHz,  $\text{CDCl}_3$ )  $\delta$  213.3, 204.7, 169.4, 128.0, 118.8, 81.7, 71.5, 70.5, 62.2, 58.0, 52.2, 40.5, 33.5, 30.6, 20.4, 19.2, 18.7 ppm; IR  $\nu_{\text{max}}$  3099, 2953, 1740, 986, 741  $\text{cm}^{-1}$ ; HRMS–ESI ( $m/z$ ):  $[\text{M}+\text{H}]^+ \text{C}_{17}\text{H}_{23}\text{BrO}_5\text{N}$ , calcd for 400.0754; found, 400.0750.

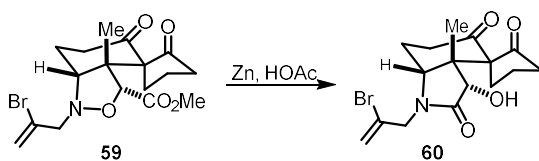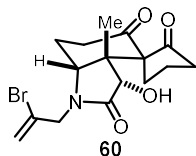

To a solution of isoxazolidine **59** (30 mg, 0.075 mmol, 1.0 equiv) in HOAc (5 mL) was added active zinc powder (245mg, 3.75 mmol, 50.0 equiv.) in one portion at room temperature. The mixture was heated to reflux for 8 hours. Then the mixture was filtered and concentrated in vacuo to afford the crude product, which was purified by silica gel column chromatography (20% to 40% ethyl acetate-petroleum ether) to give product **60** as a white solid (20 mg, 72%);  $R_f = 0.4$  (50% ethyl acetate-petroleum ether);  $^1\text{H}$  NMR (500 MHz,  $\text{CDCl}_3$ )  $\delta$  5.89 (d,  $J = 1.8$  Hz, 1H), 5.69 (d,  $J = 2.5$  Hz, 1H), 4.66 (d,  $J = 15.2$  Hz, 1H), 4.27 – 4.16 (m, 1H), 3.89 (t,  $J = 6.2$  Hz, 1H), 3.82 – 3.72 (m, 2H), 2.99 (ddd,  $J = 11.2, 8.1, 6.5$  Hz, 1H), 2.74 – 2.62 (m, 1H), 2.57 – 2.34 (m, 3H), 2.28 – 2.07 (m, 2H), 1.97 (tdt,  $J = 10.0, 5.3, 2.9$  Hz, 3H), 1.14 (s, 3H) ppm;  $^{13}\text{C}$  NMR (126 MHz,  $\text{CDCl}_3$ )  $\delta$  215.6, 204.0, 173.1, 126.9, 121.4, 77.5, 69.3, 60.9, 48.6, 47.8, 40.1, 34.4, 29.7, 25.2, 21.5, 20.2 ppm; IR  $\nu_{\text{max}}$  3728, 3059, 1659, 1267, 1013, 741  $\text{cm}^{-1}$ ; HRMS–ESI ( $m/z$ ):  $[\text{M}+\text{H}]^+ \text{C}_{16}\text{H}_{21}\text{BrO}_4\text{N}$ , calcd for 370.0648; found, 370.0637.

## II. $^1\text{H}$ and $^{13}\text{C}$ NMR Spectra

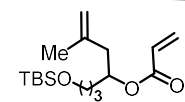

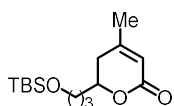

**18**

Chemical Formula:  $C_{15}H_{28}O_3Si$   
500 MHz,  $CDCl_3$

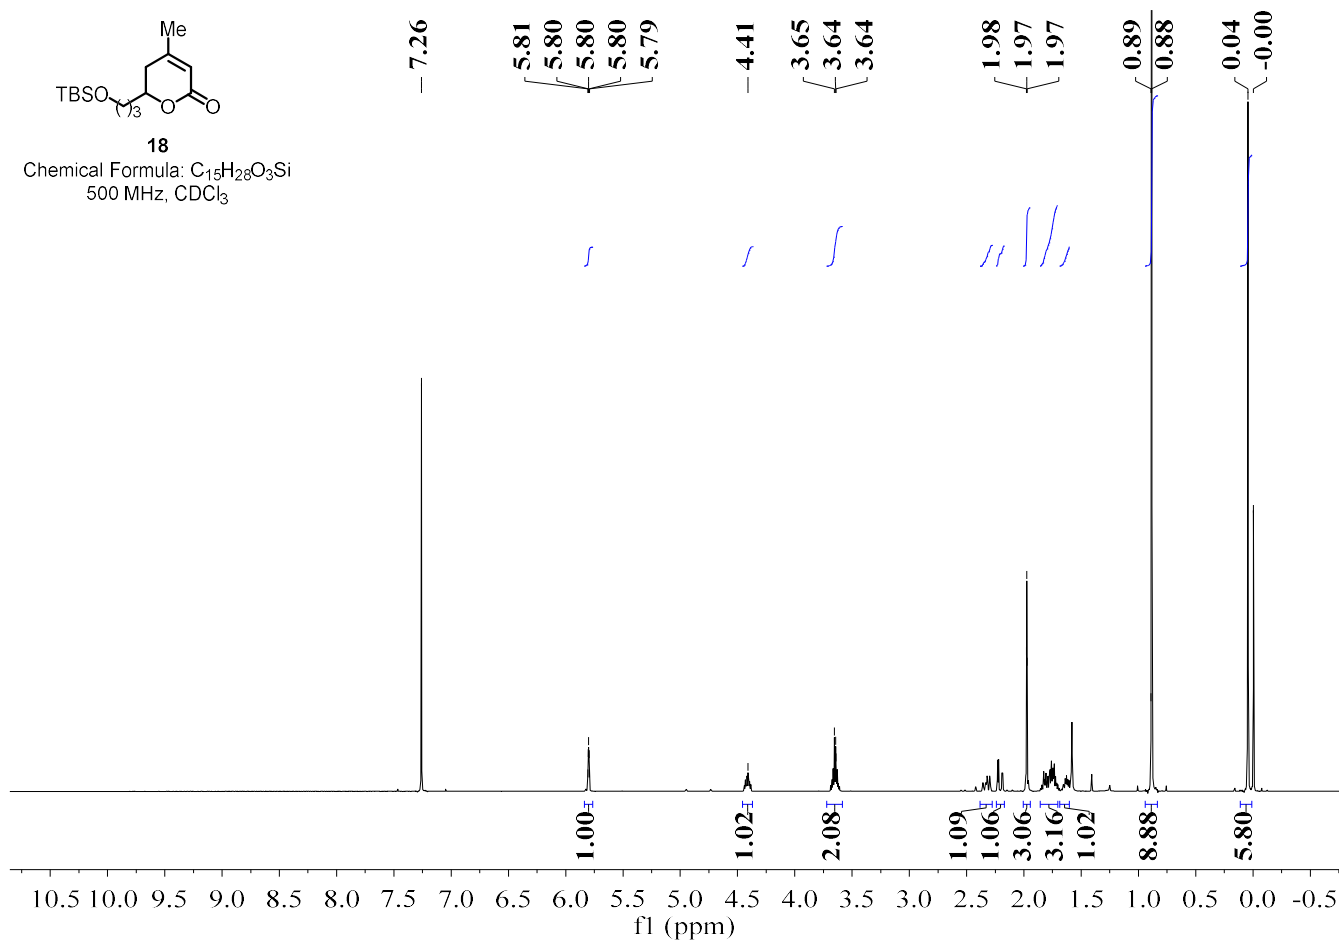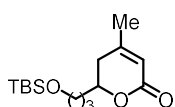

**18**

Chemical Formula:  $C_{15}H_{28}O_3Si$   
126 MHz,  $CDCl_3$

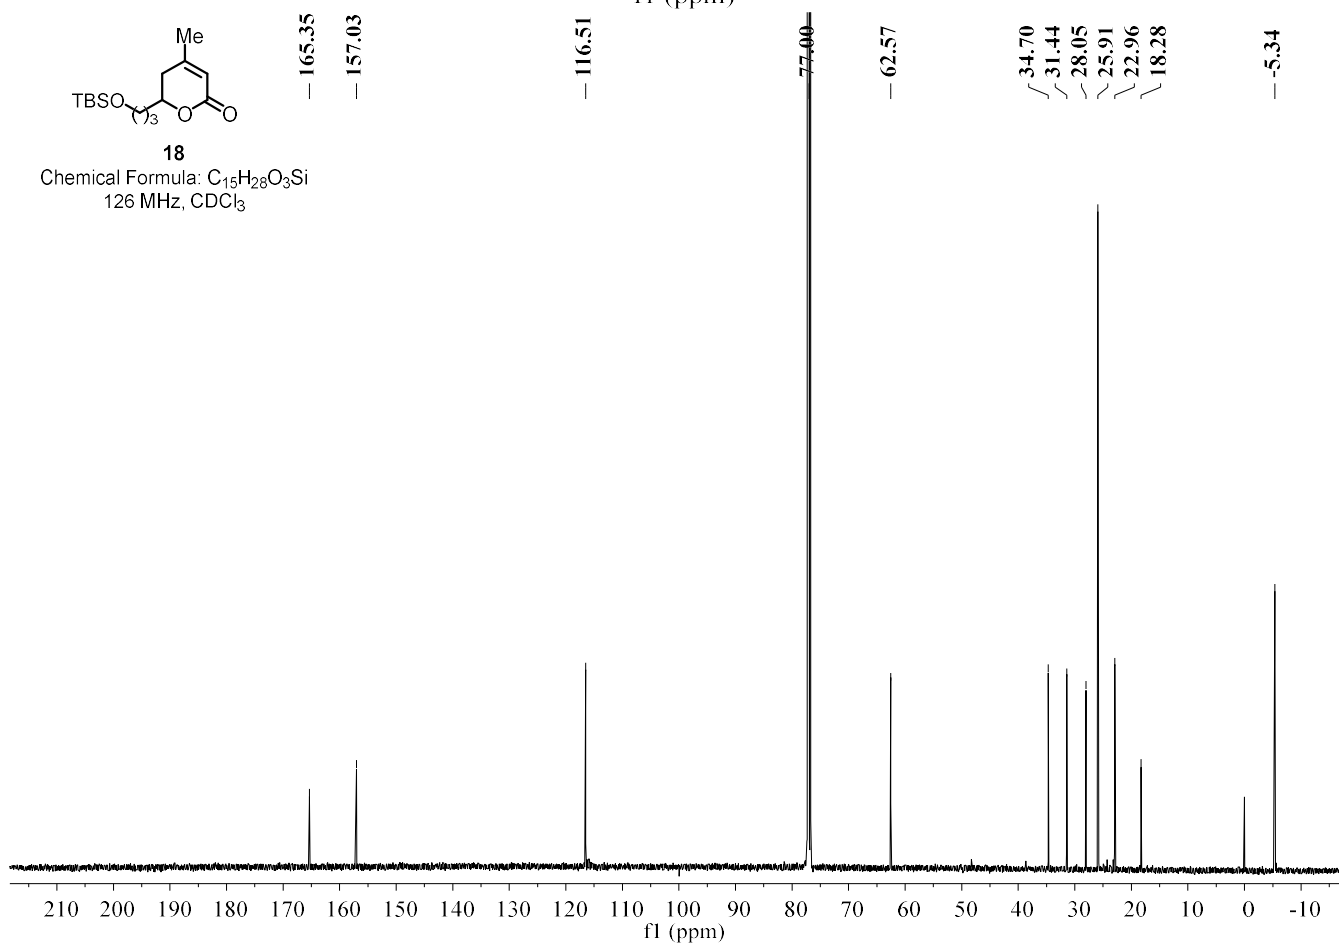

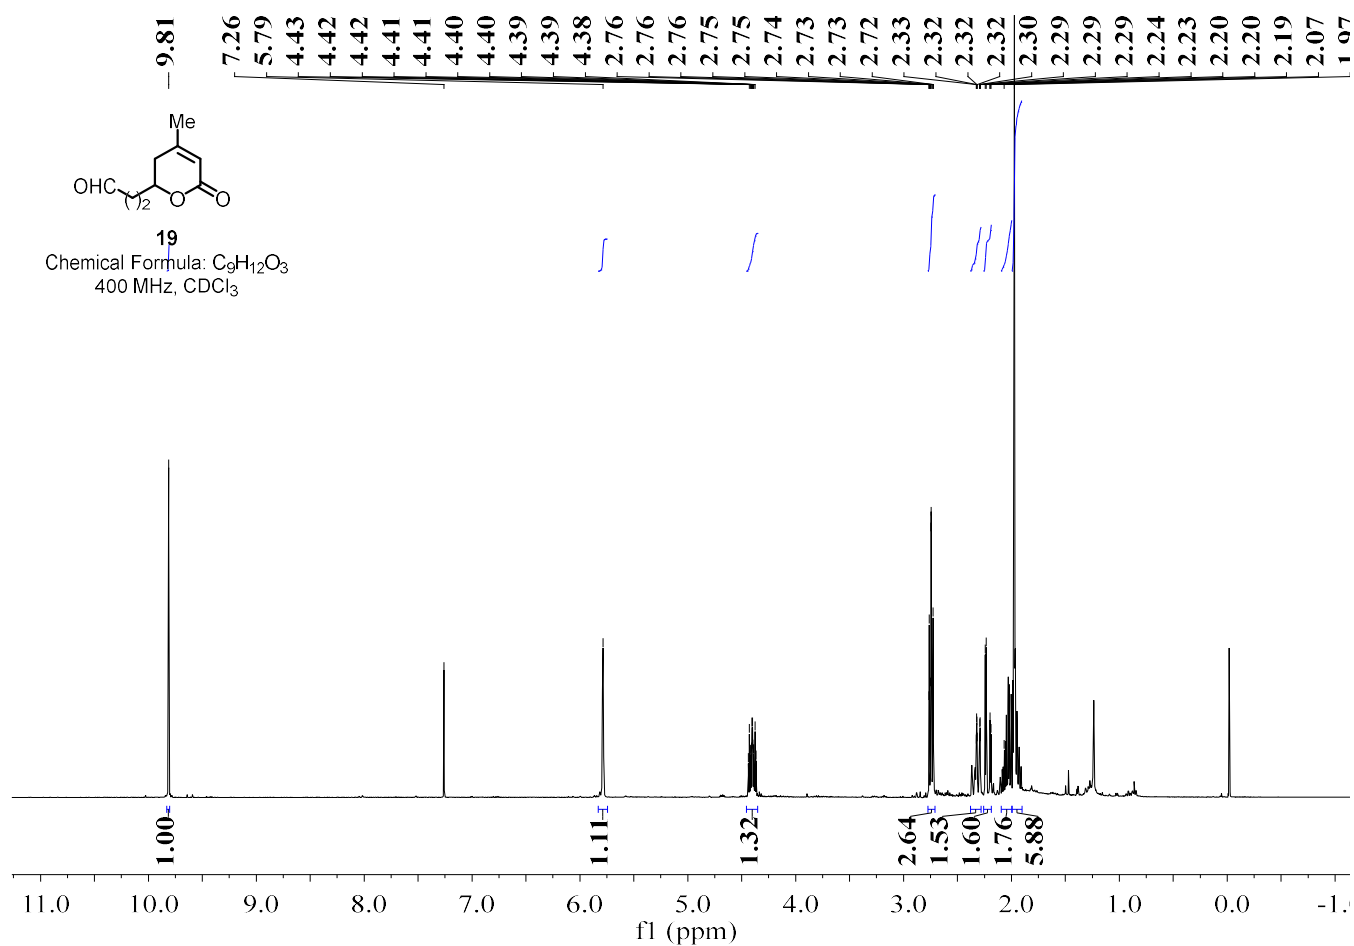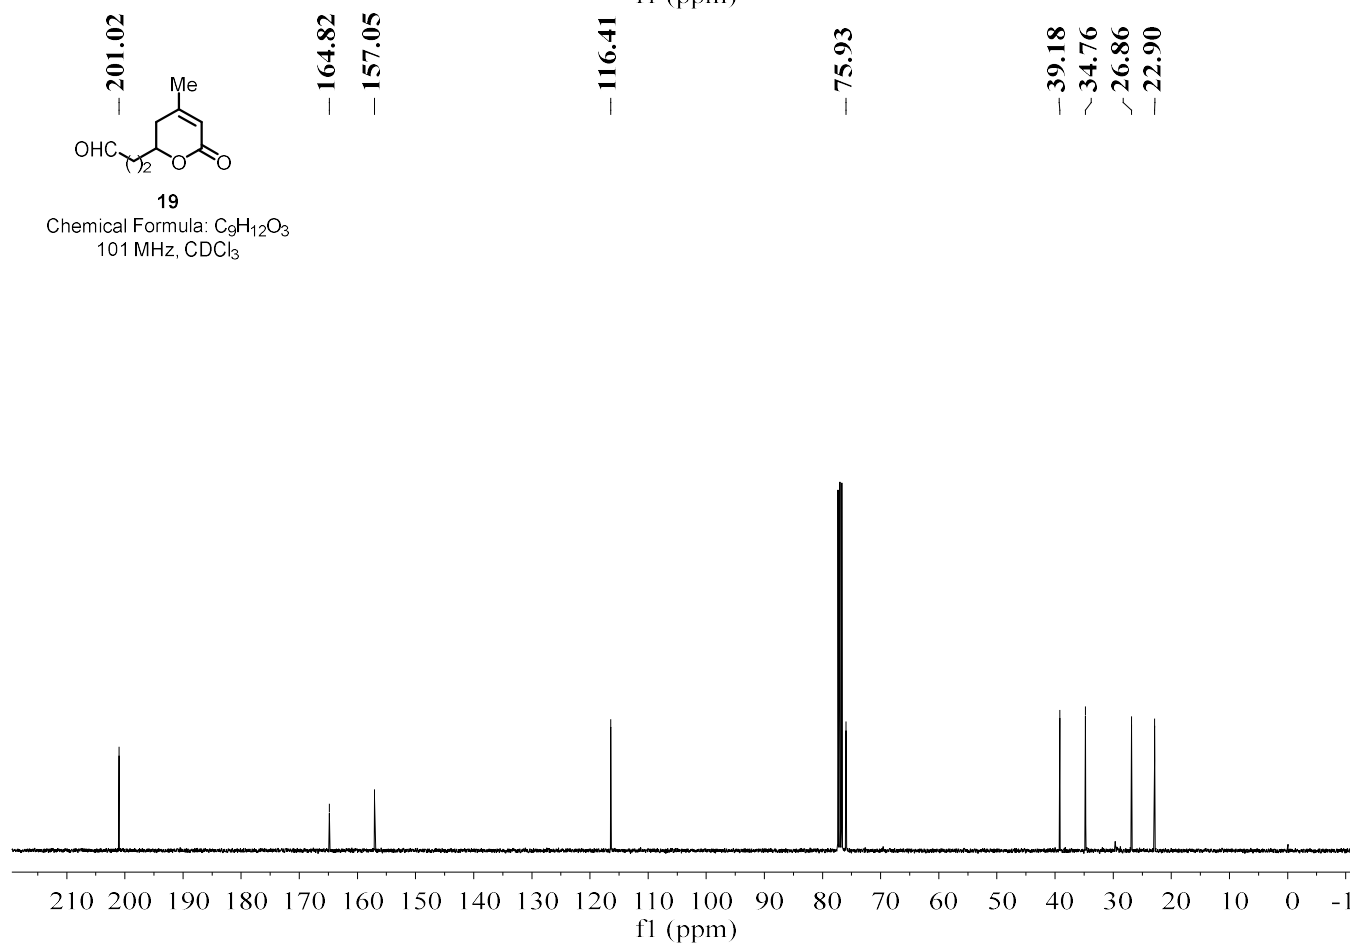



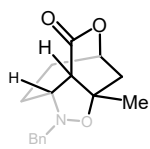

Chemical Formula:  $C_{16}H_{19}NO_3$   
400 MHz,  $CDCl_3$

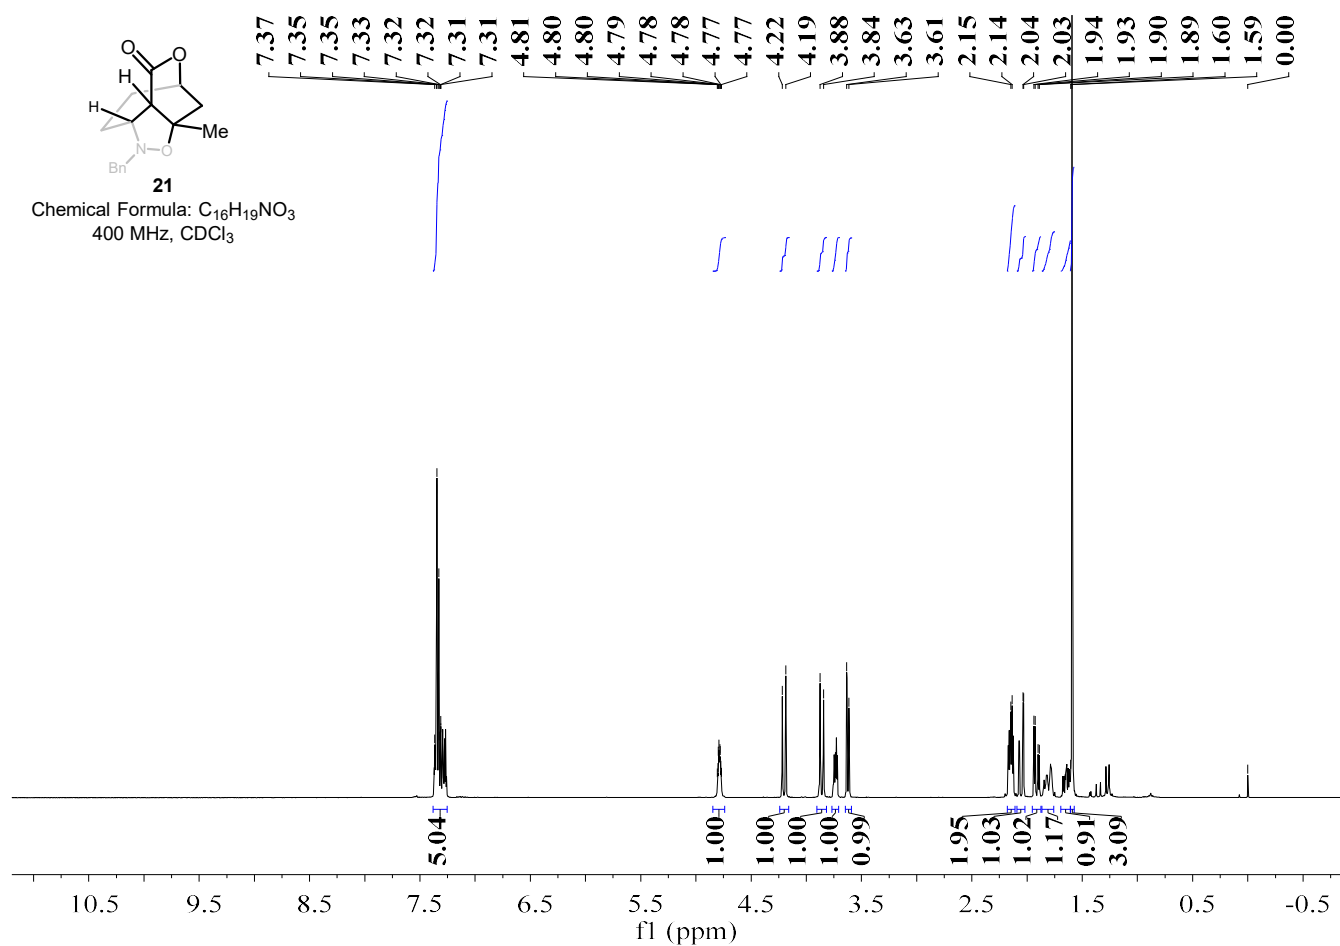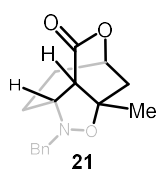

Chemical Formula:  $C_{16}H_{19}NO_3$   
101 MHz,  $CDCl_3$

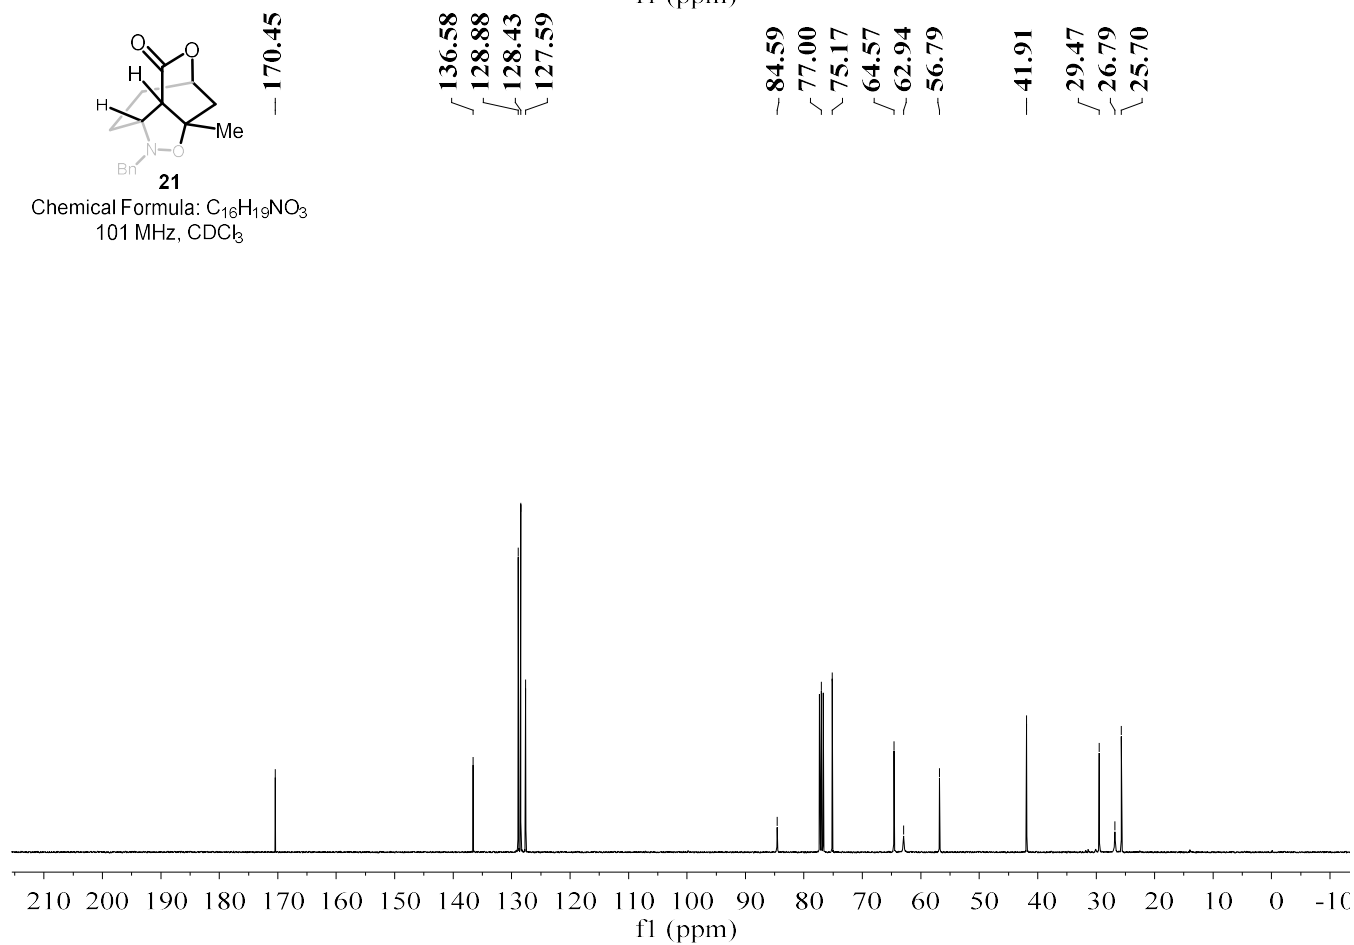

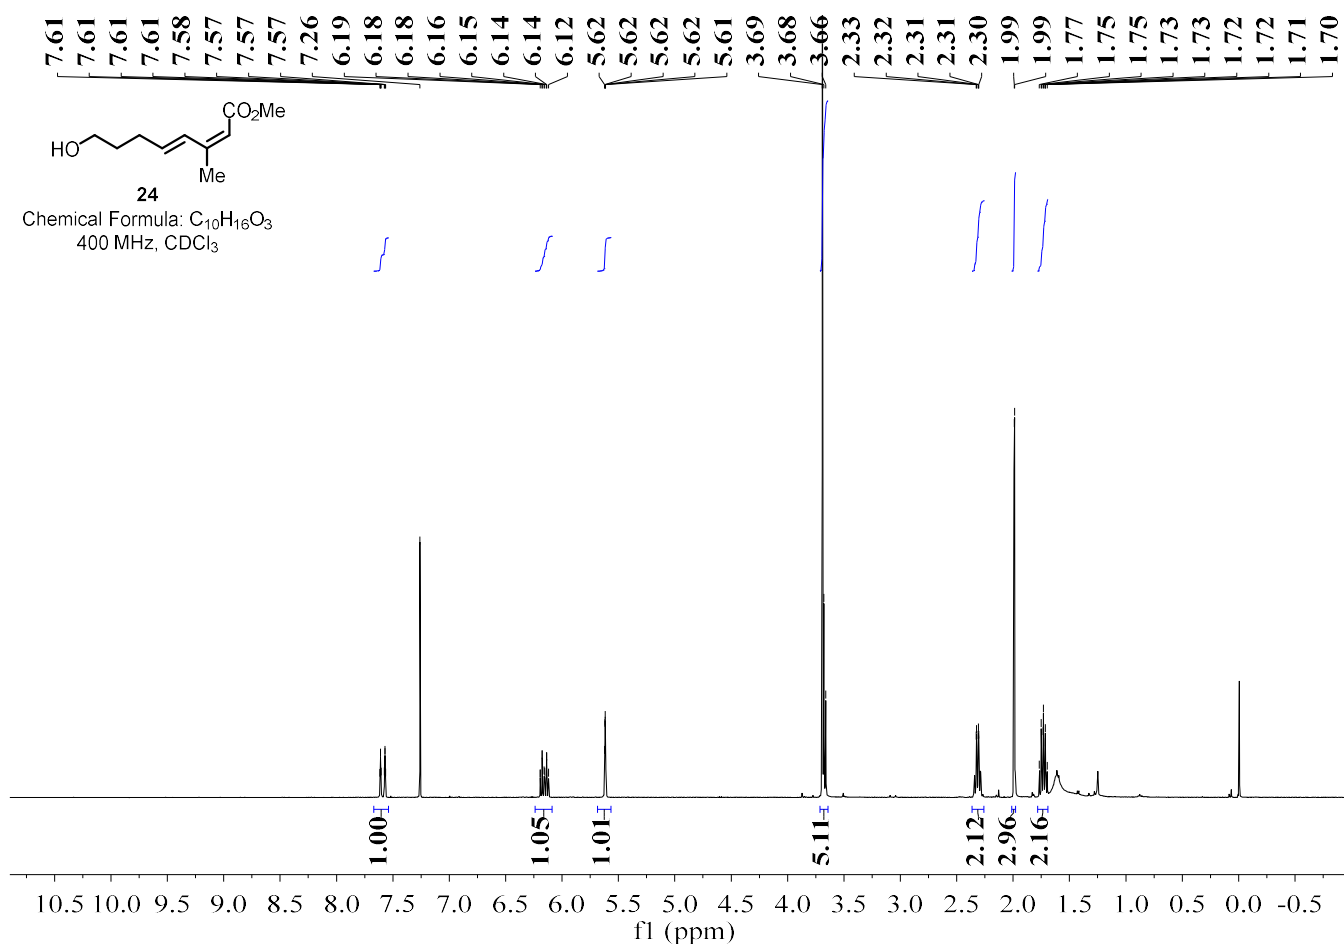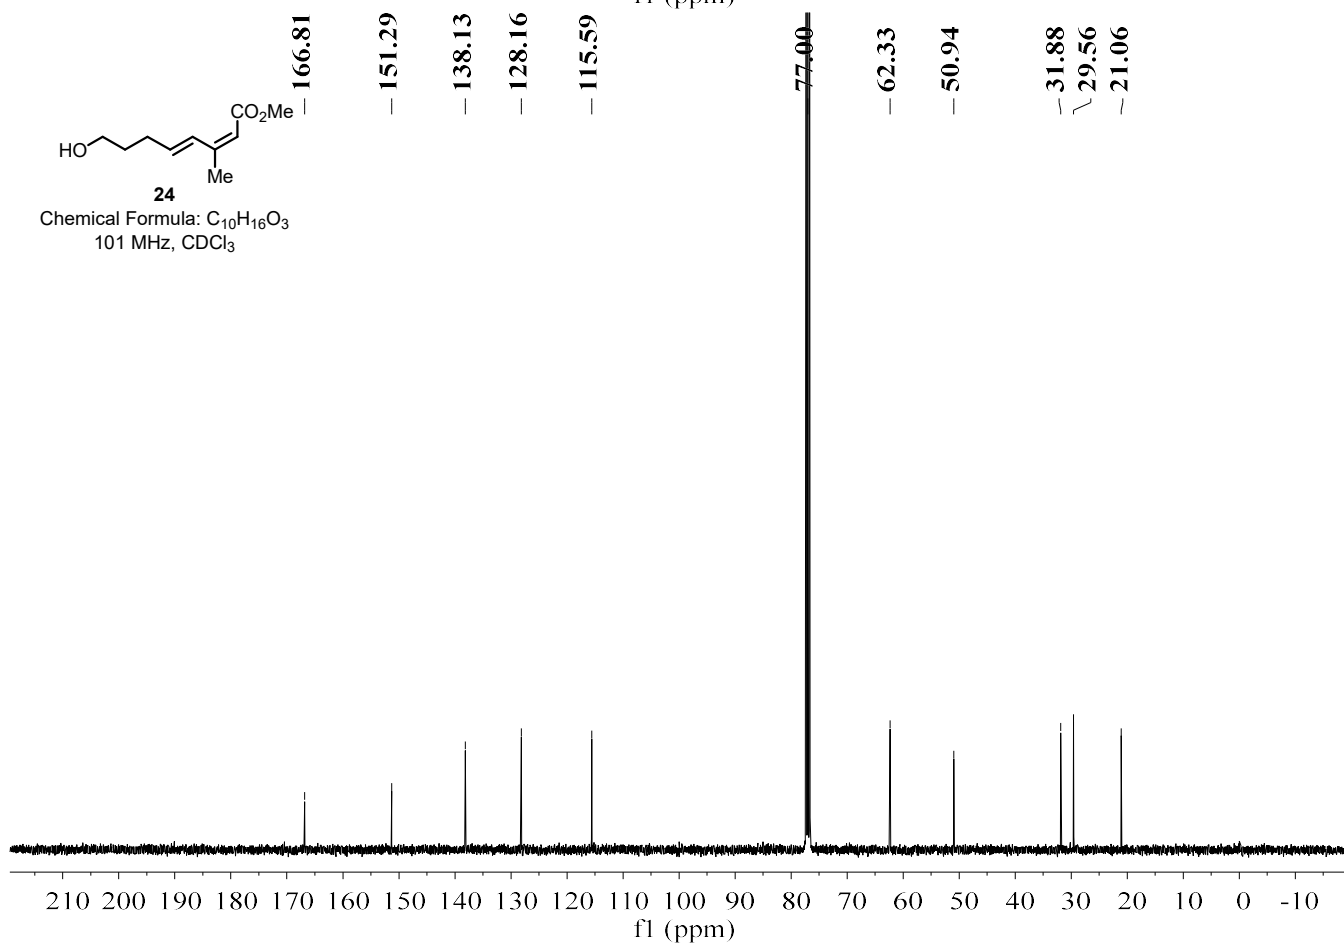

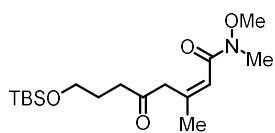

**46**

Chemical Formula:  $C_{17}H_{33}NO_4Si$   
400 MHz,  $CDCl_3$

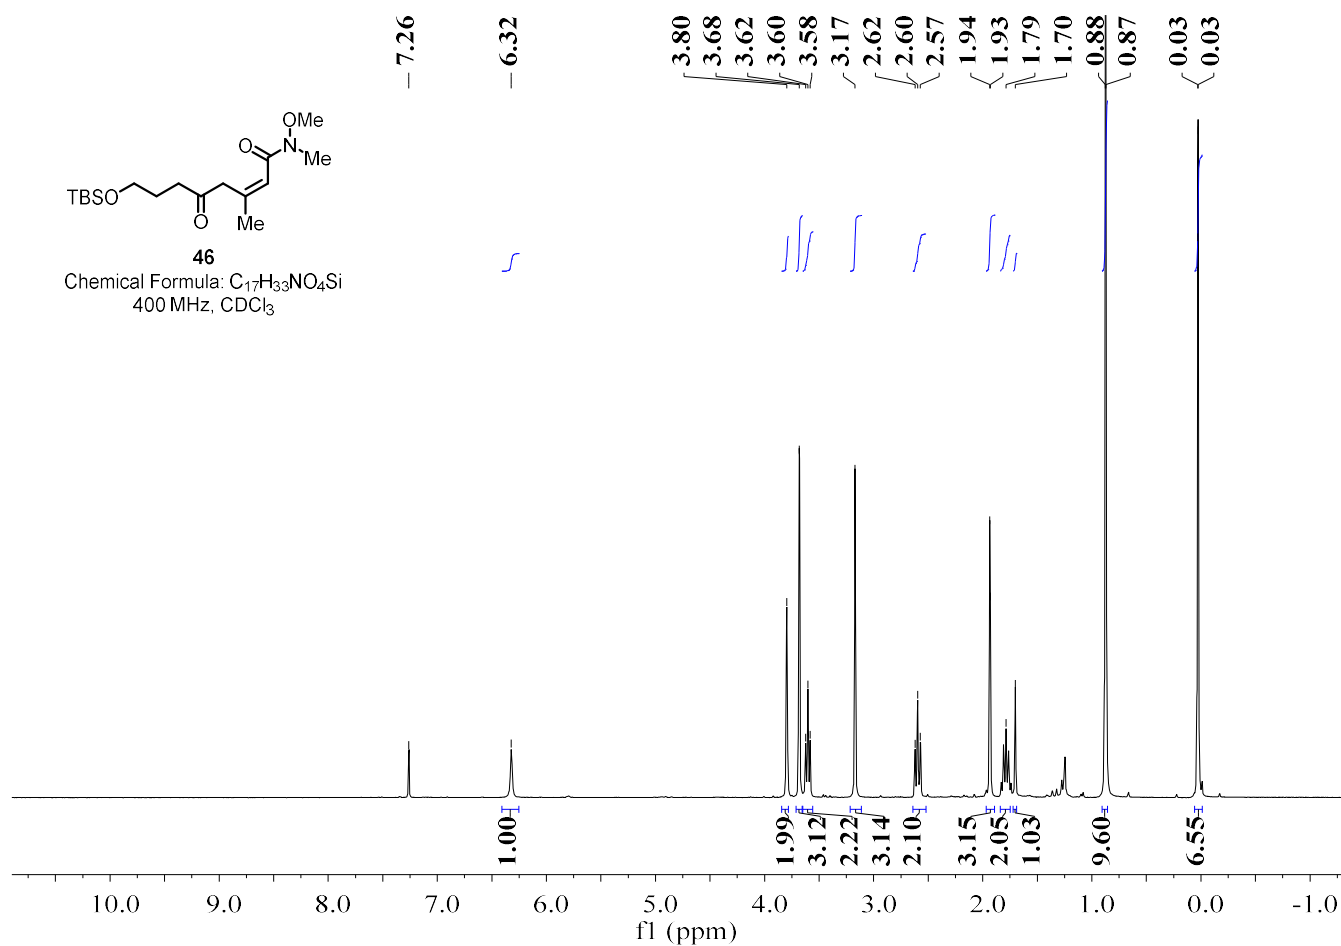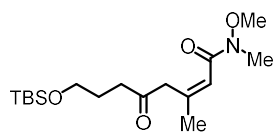

**46**

Chemical Formula:  $C_{17}H_{33}NO_4Si$   
101 MHz,  $CDCl_3$

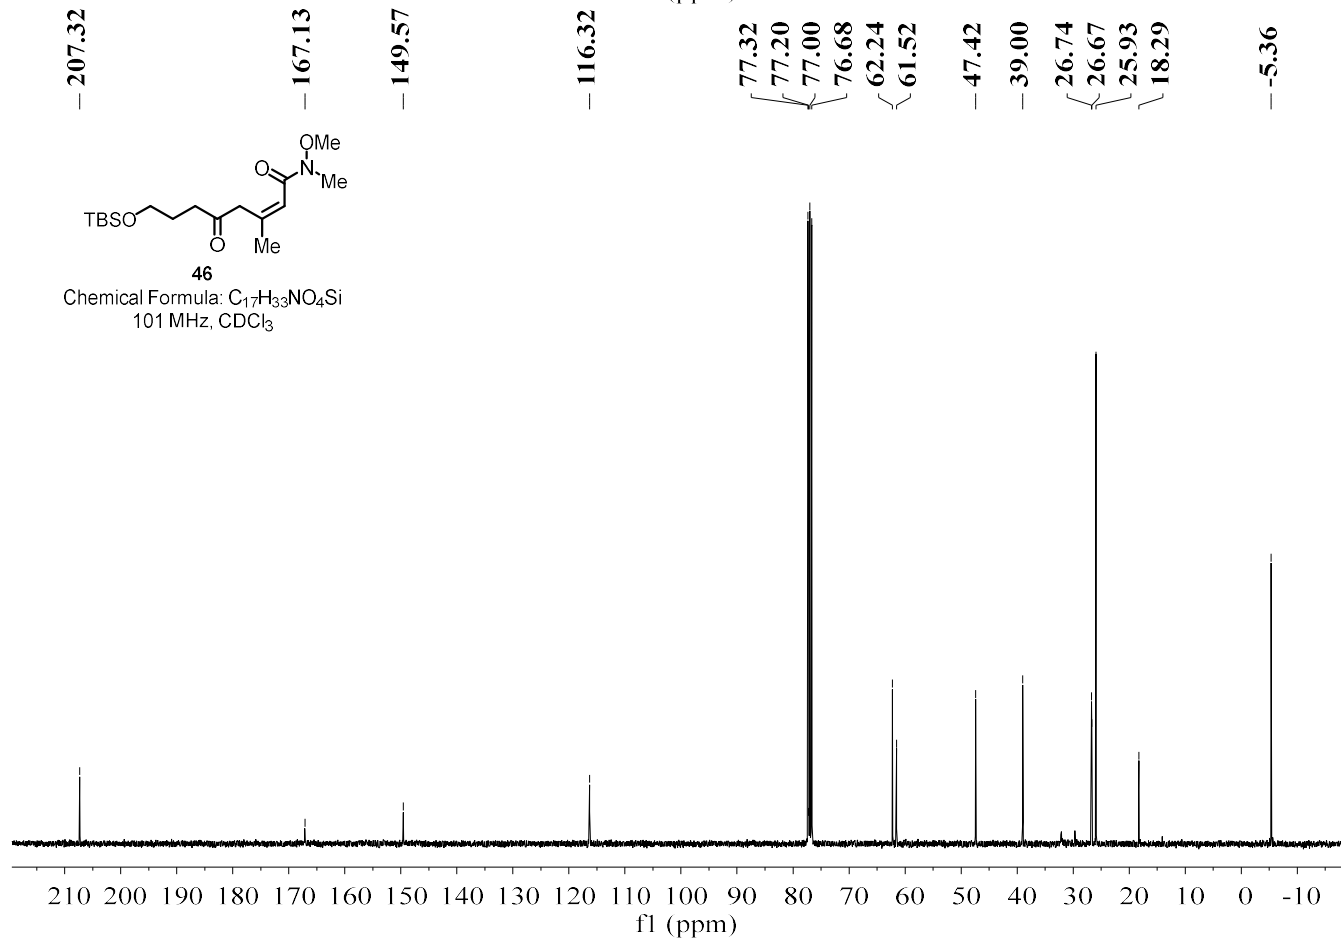

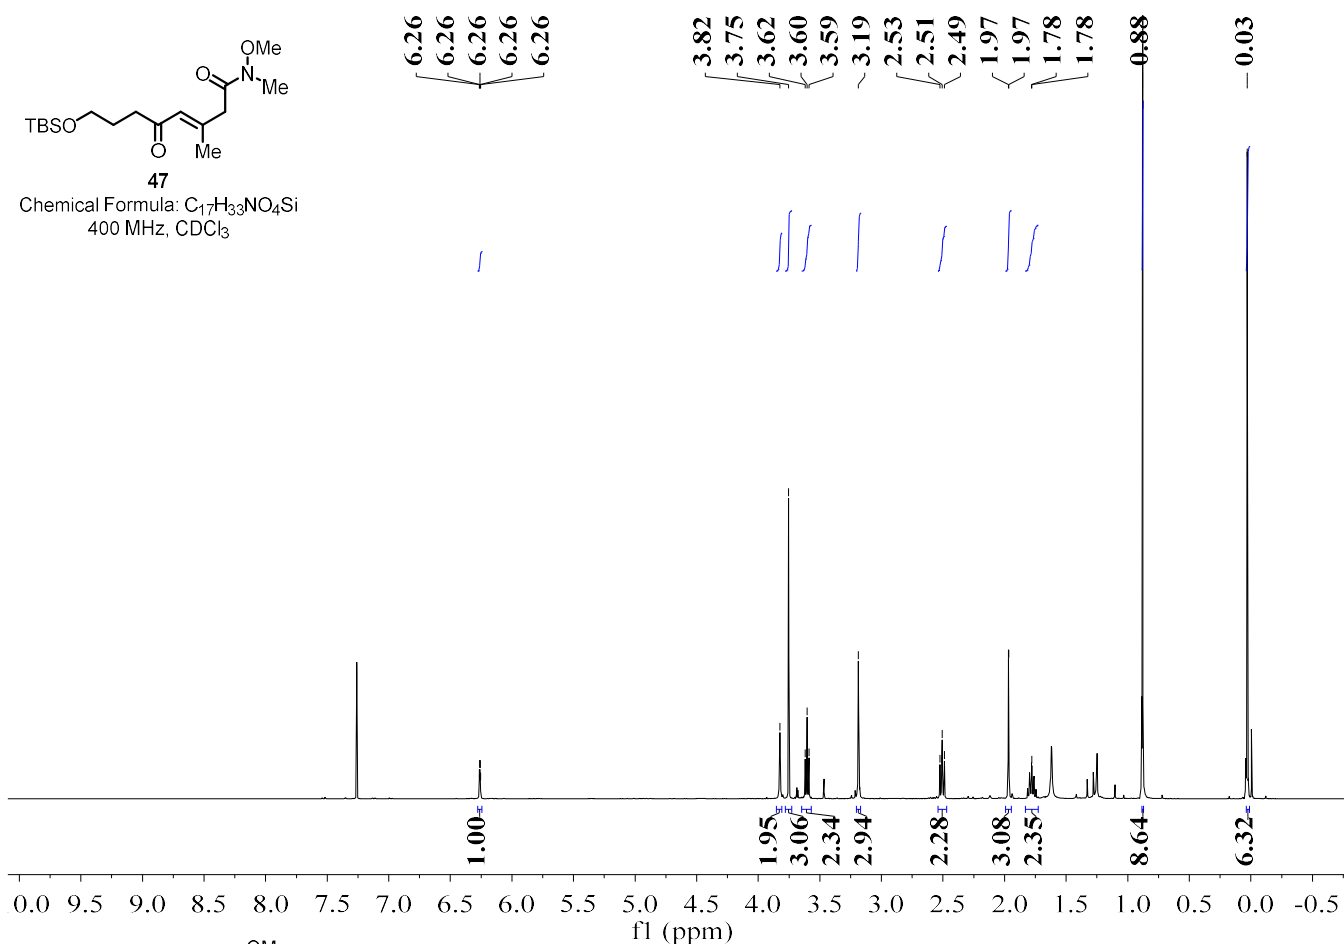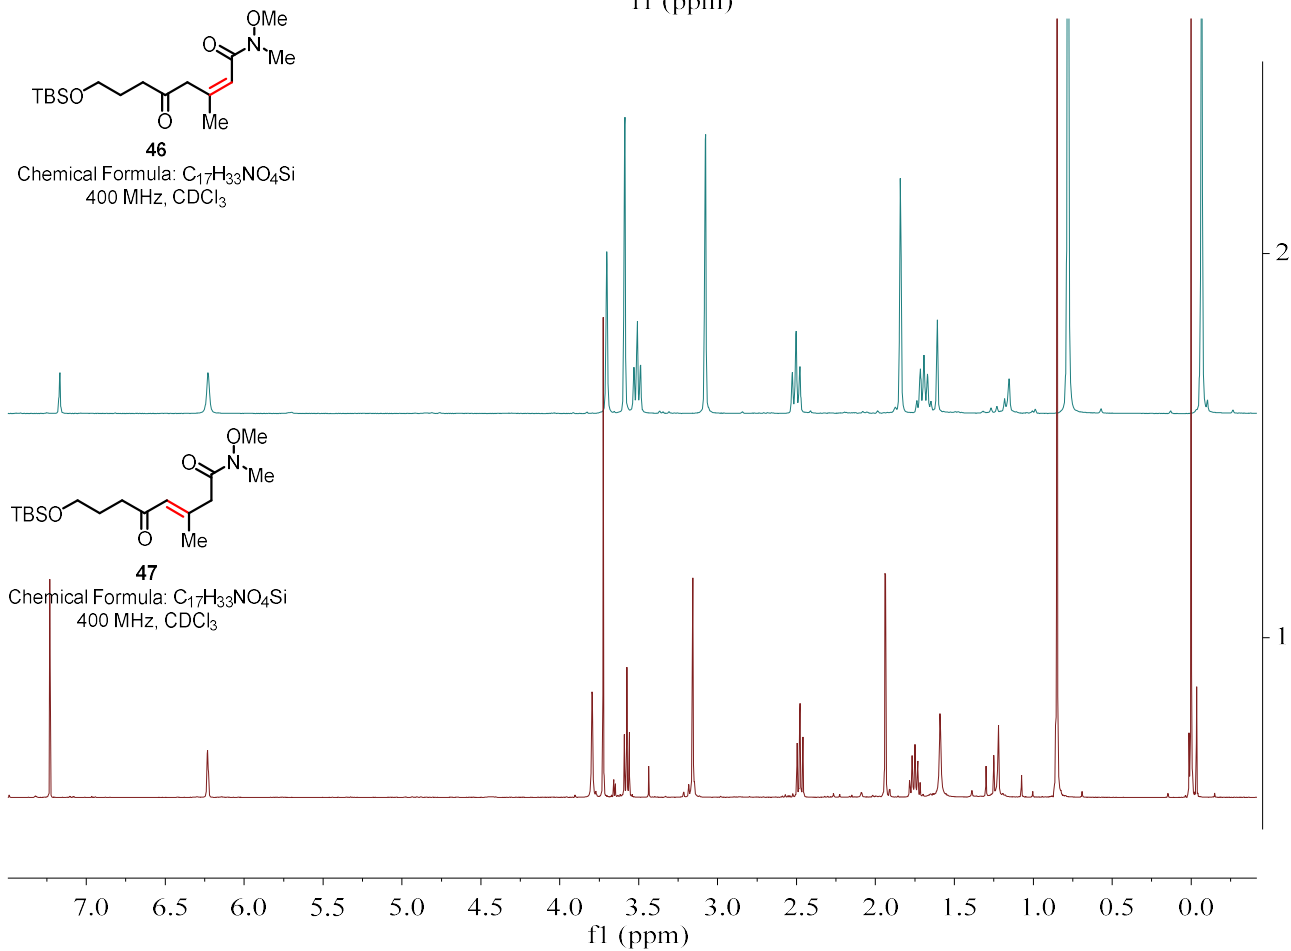

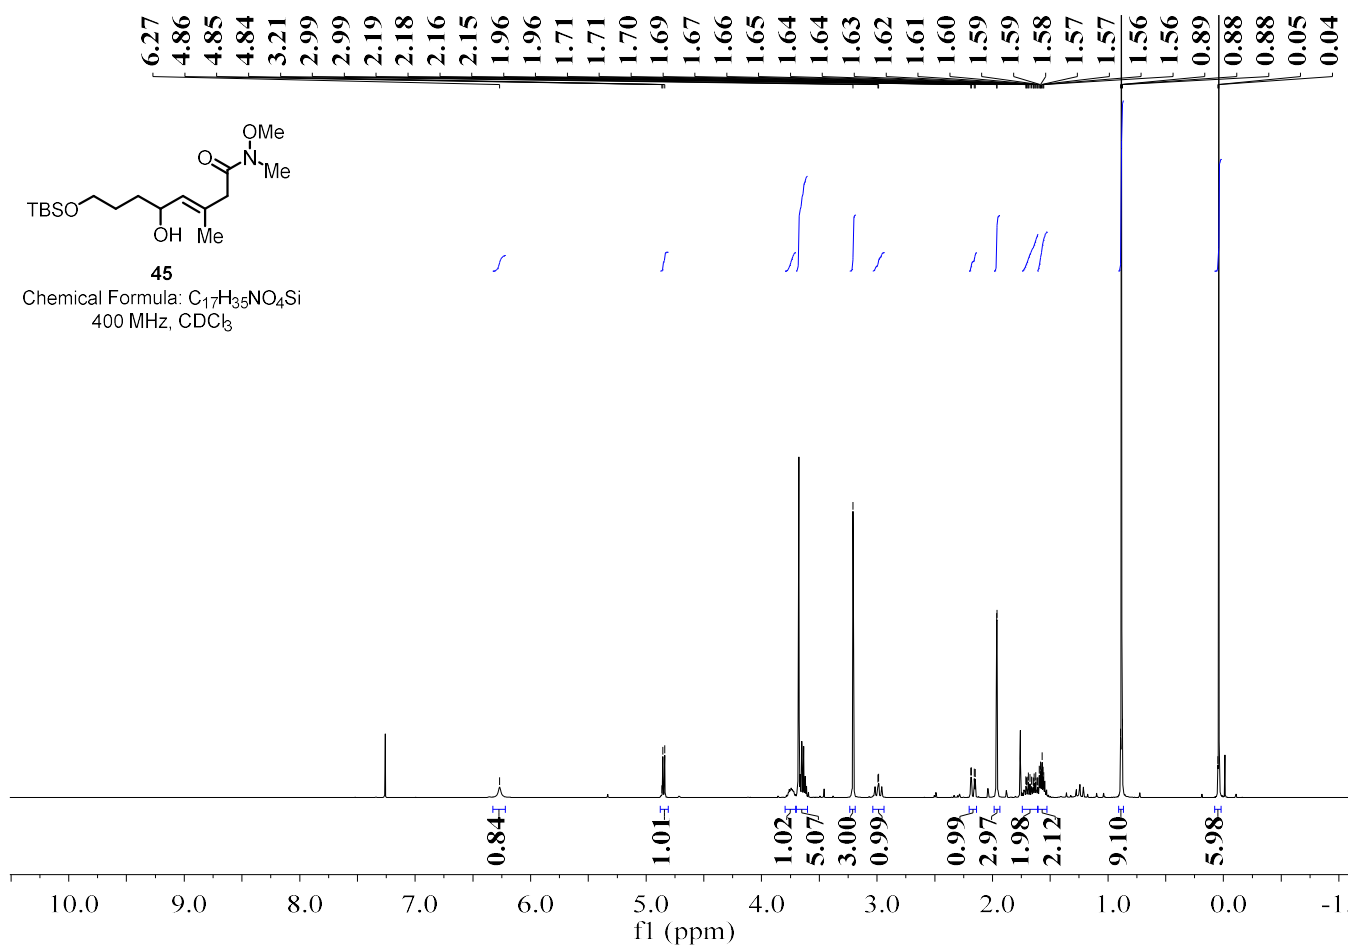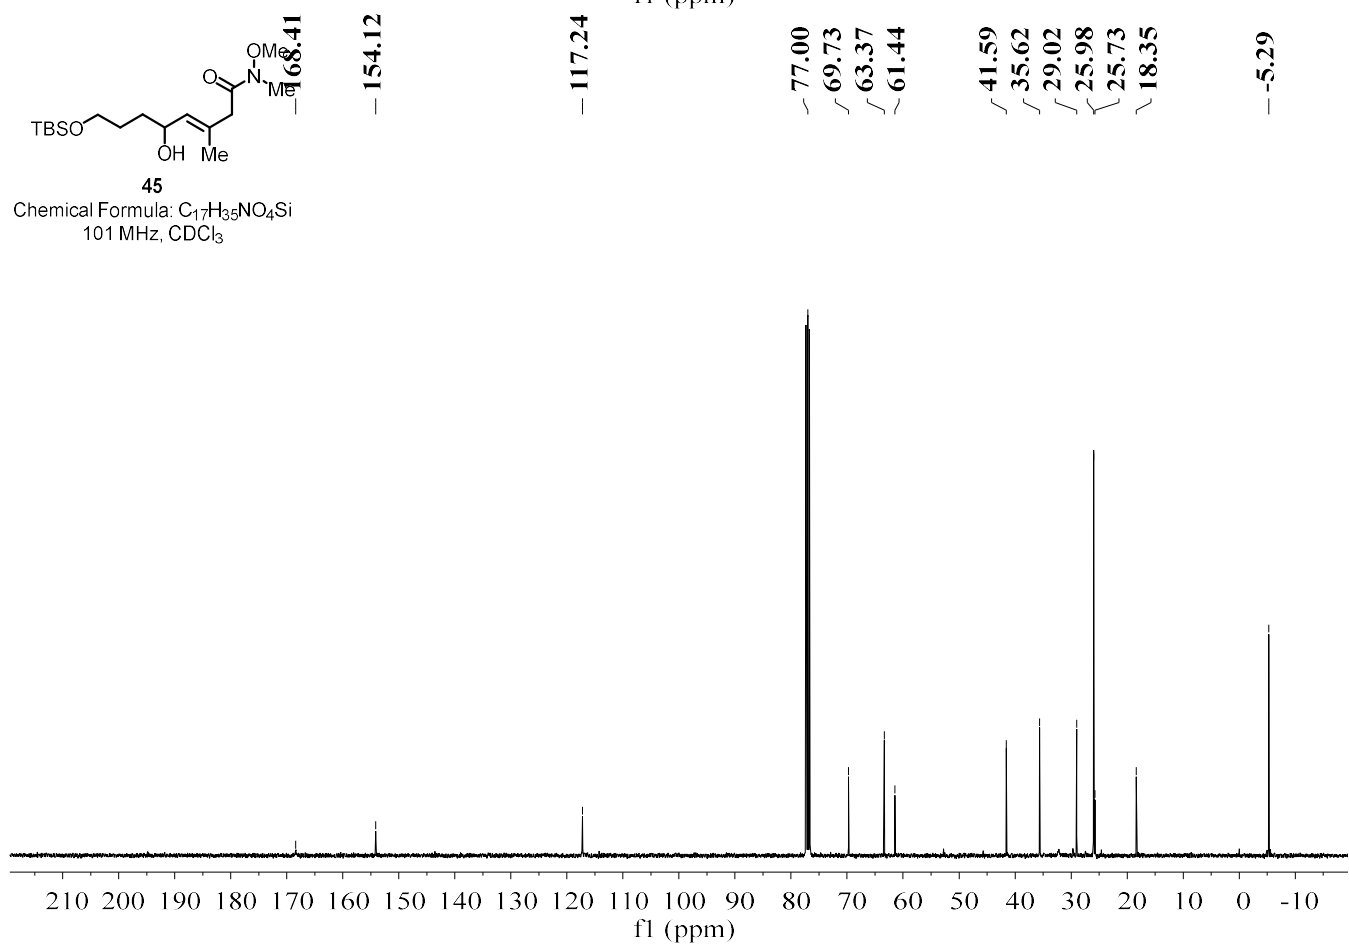

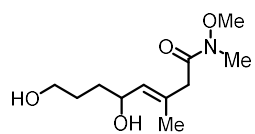

**22**  
Chemical Formula:  $C_{11}H_{21}NO_4$   
400 MHz,  $CDCl_3$

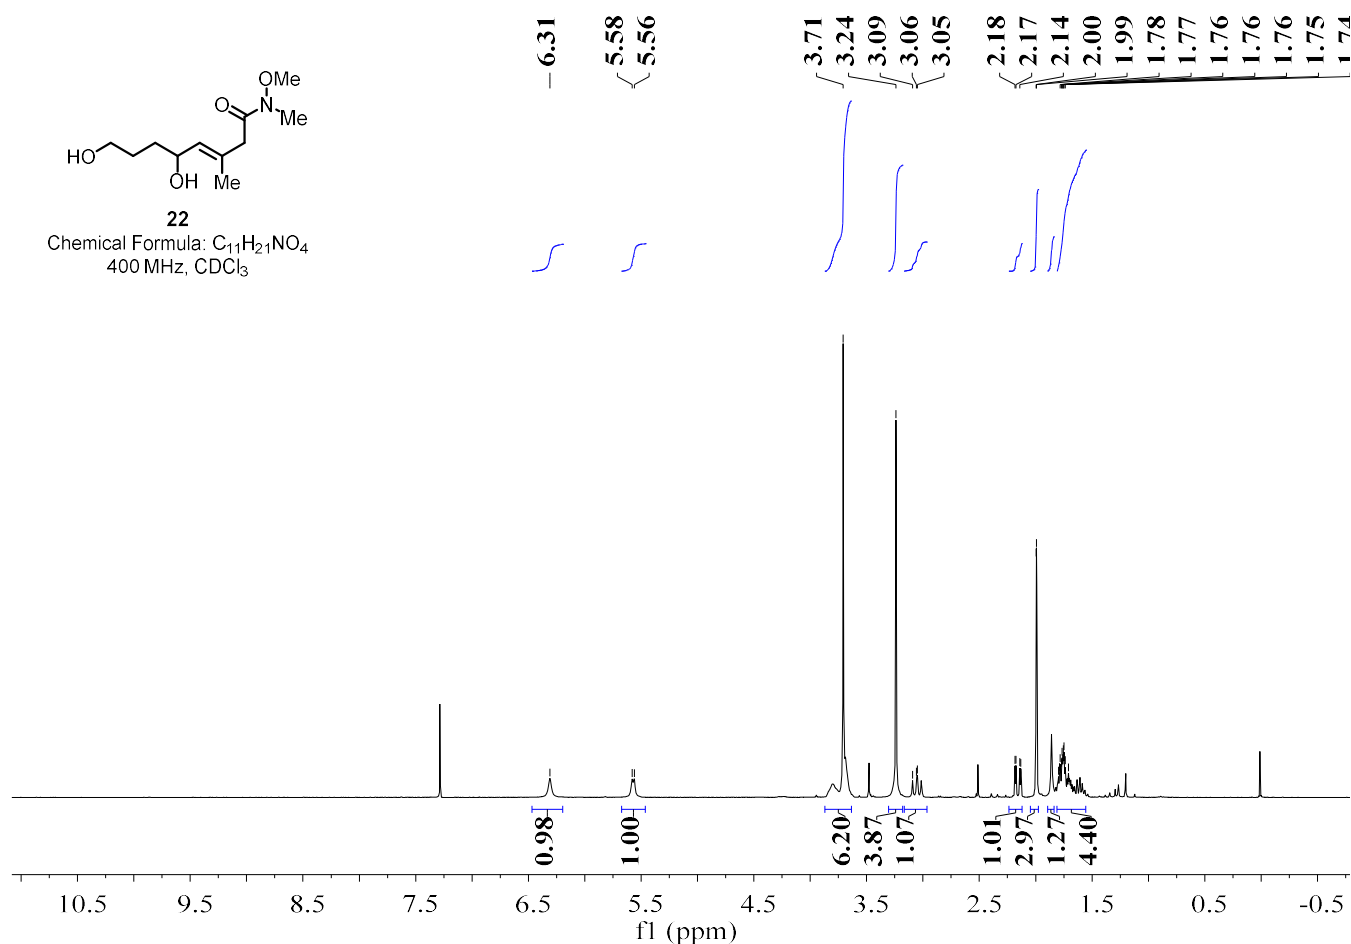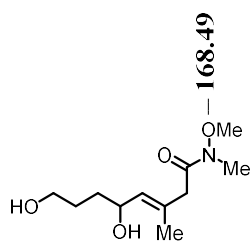

**22**  
Chemical Formula:  $C_{11}H_{21}NO_4$   
101 MHz,  $CDCl_3$

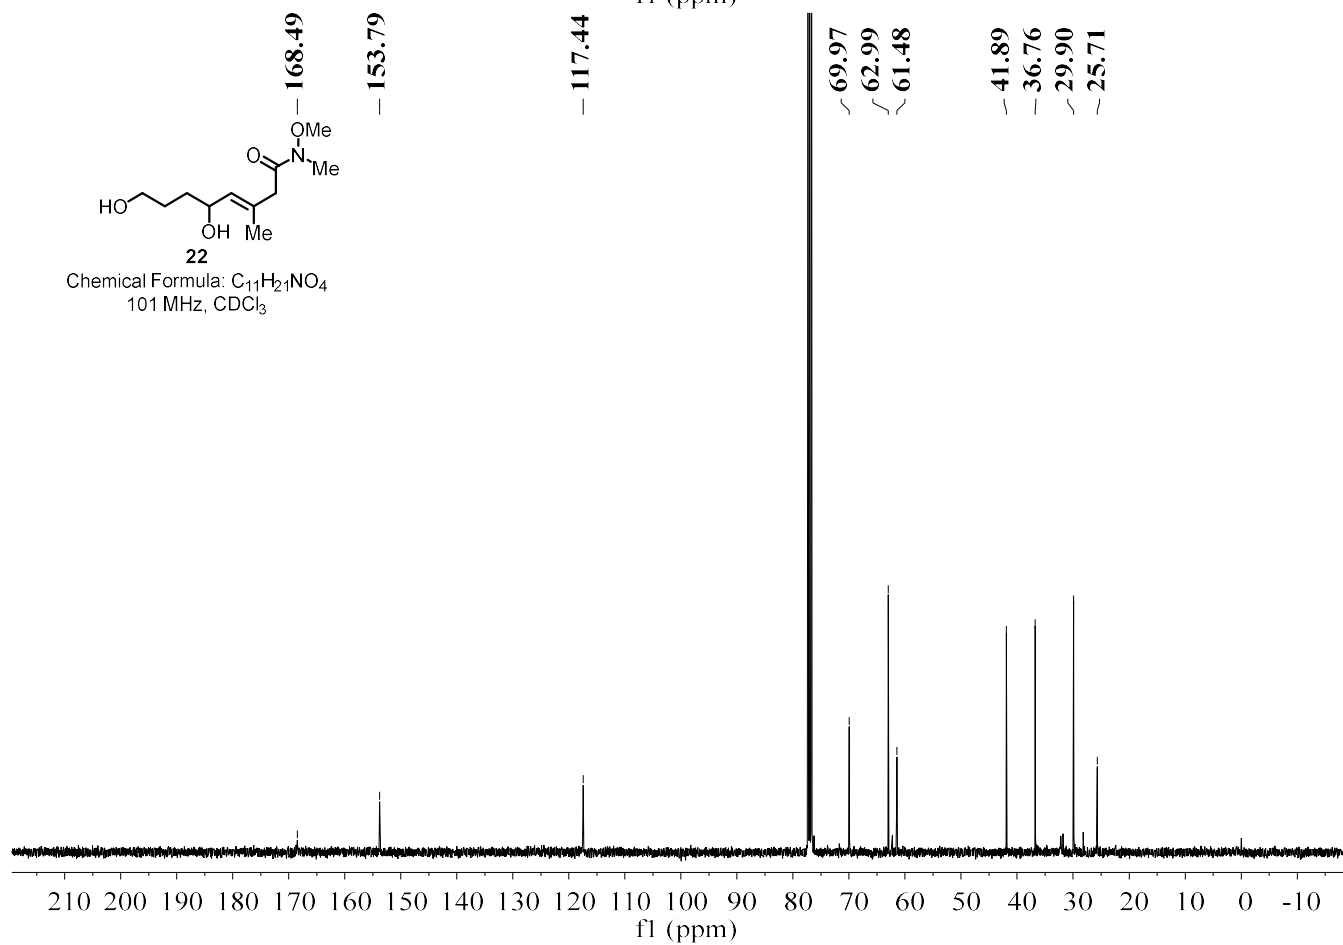

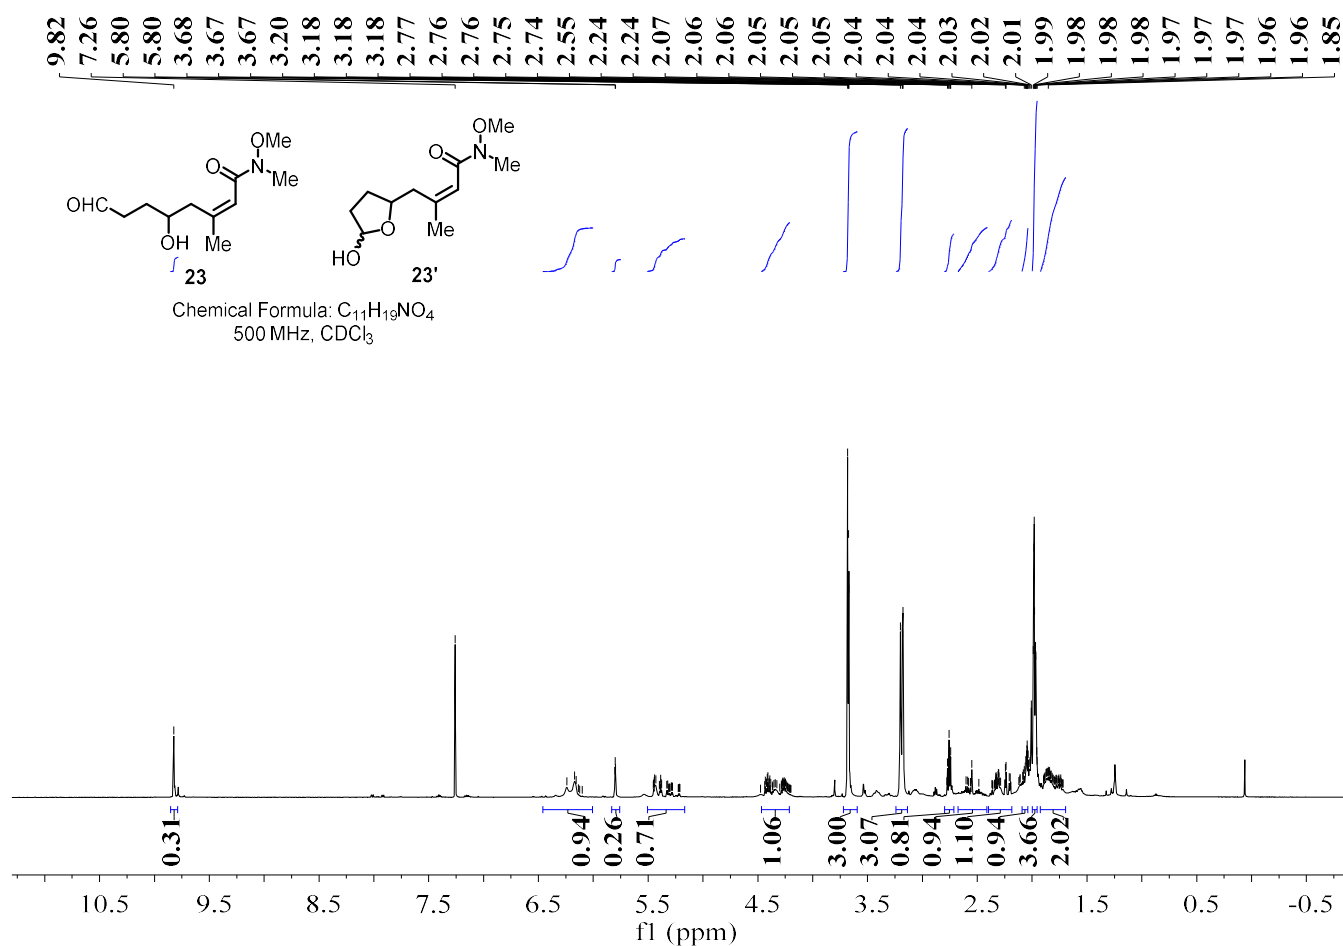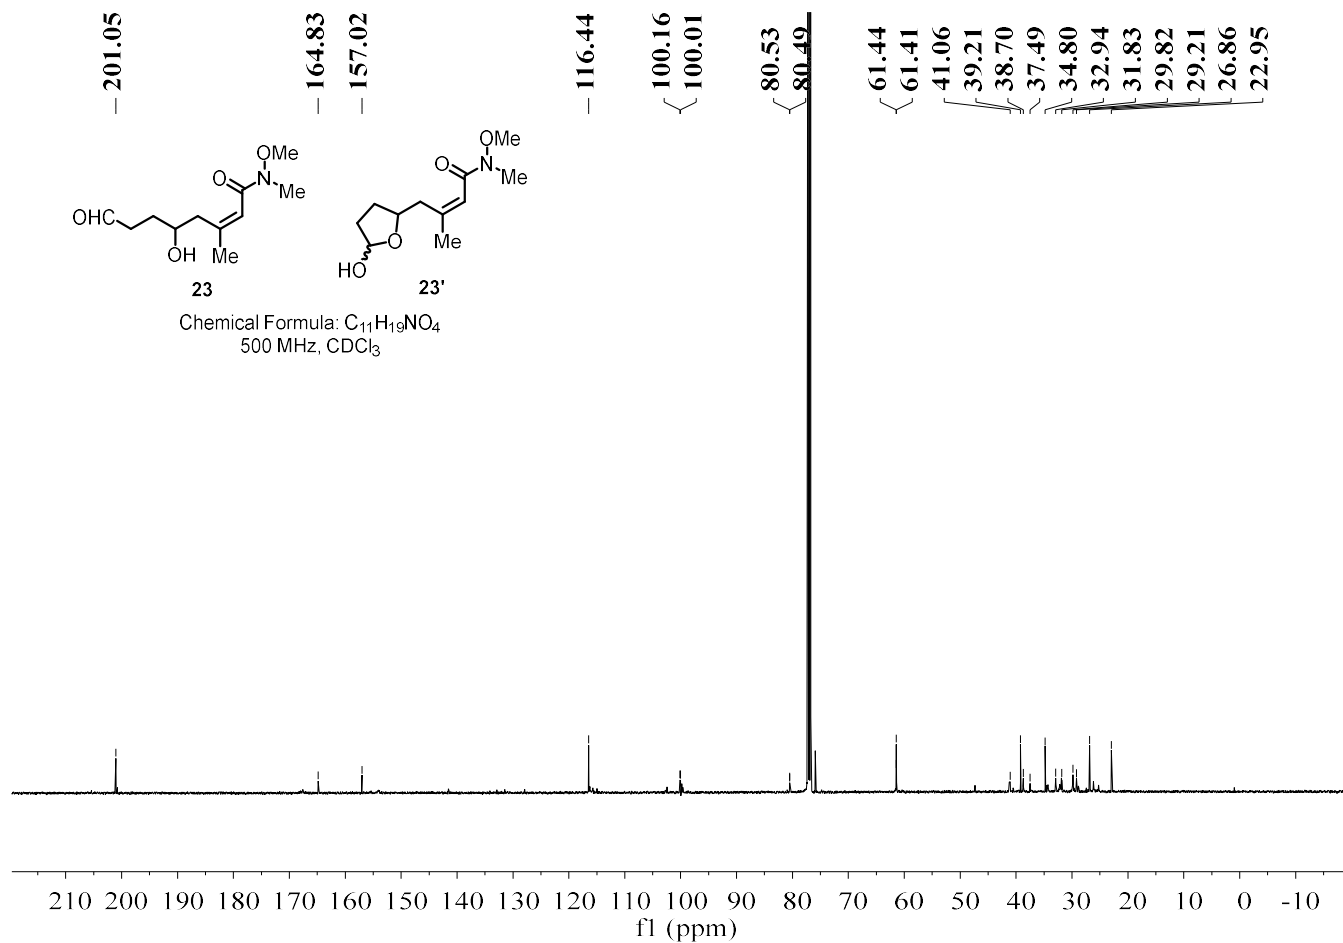

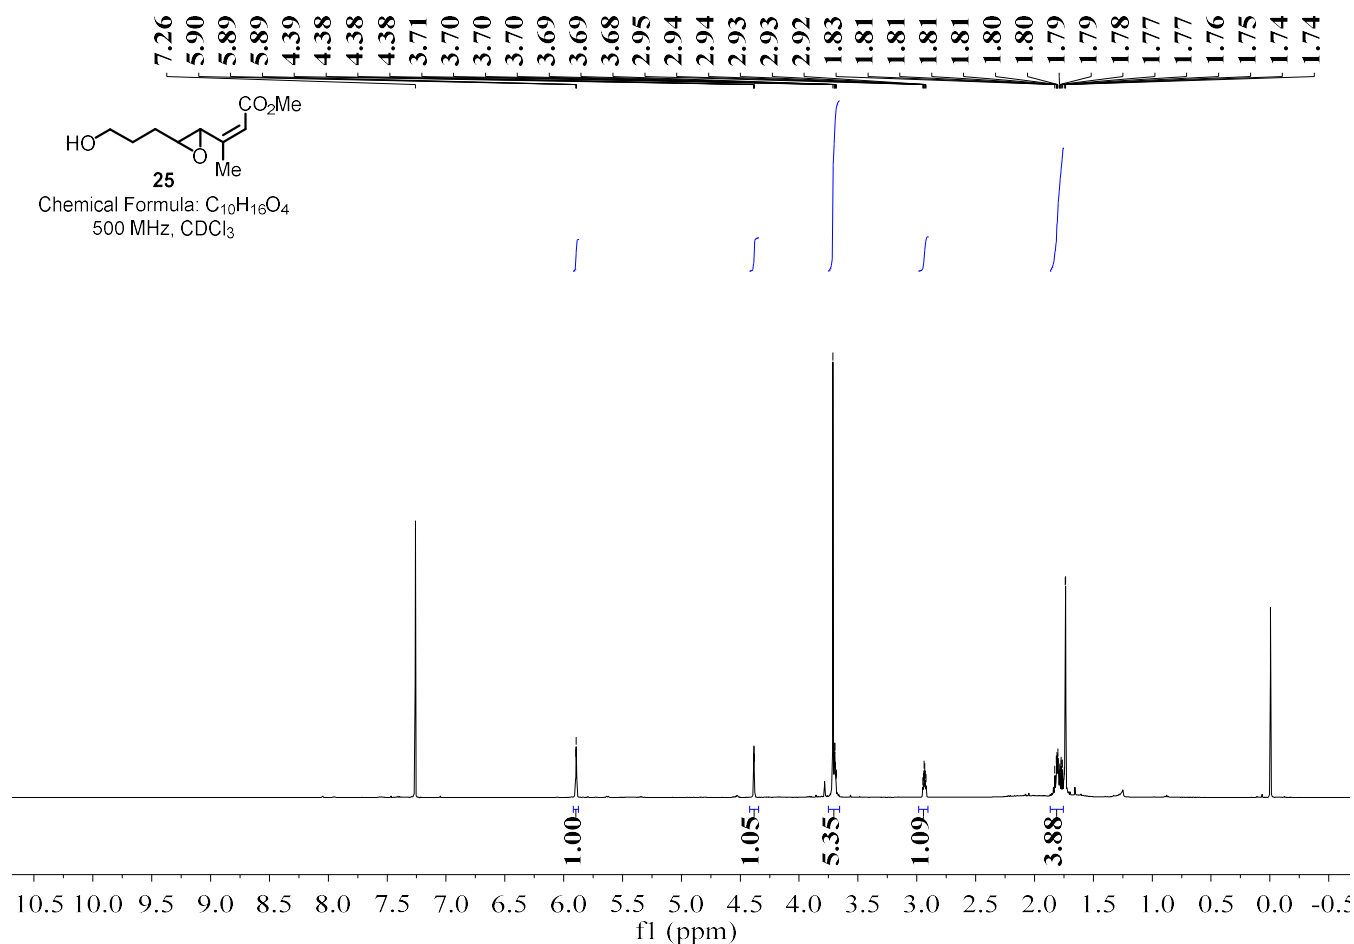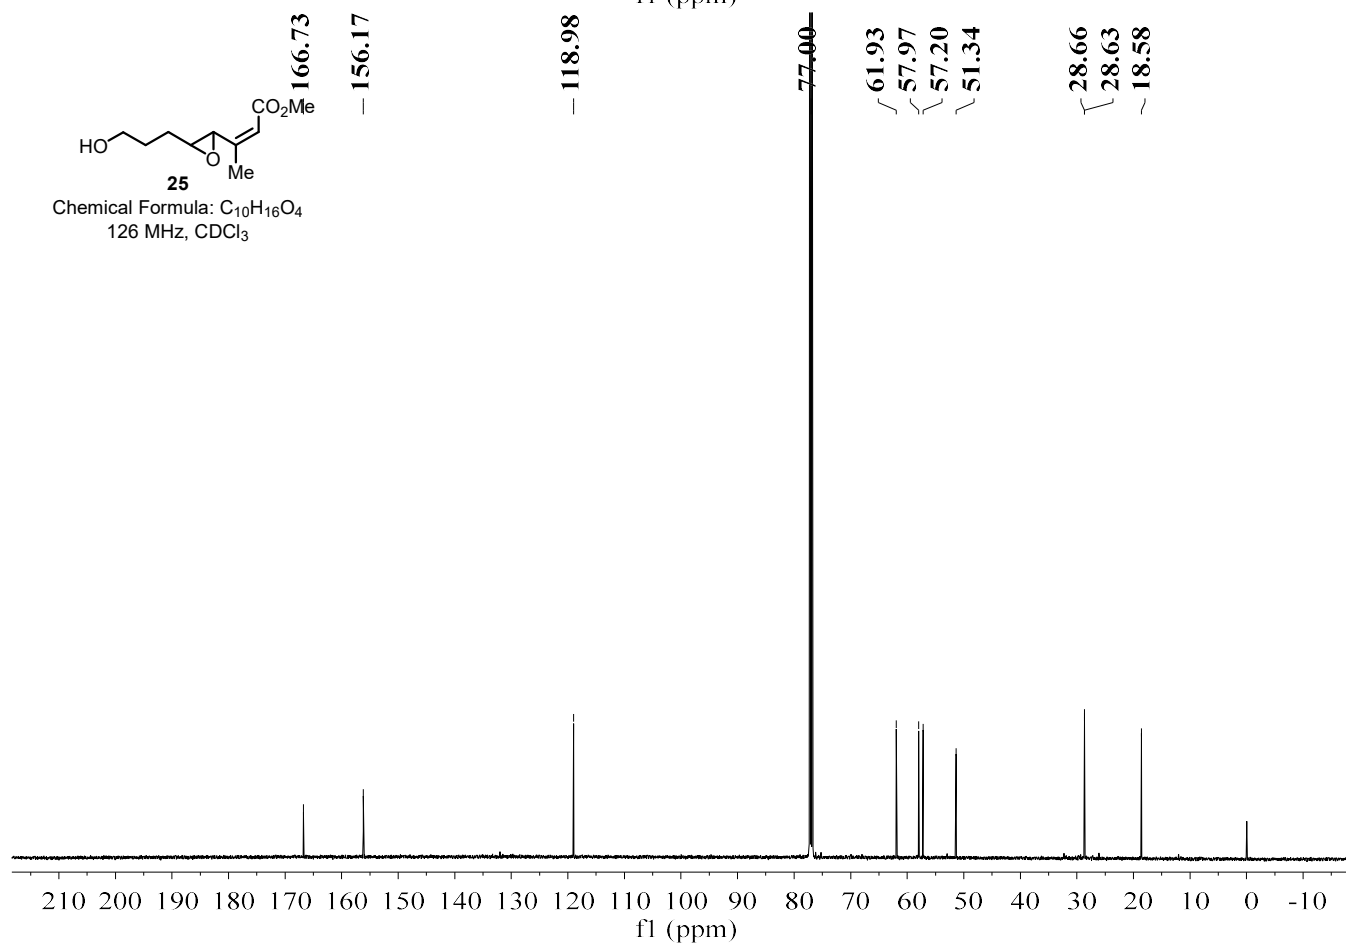



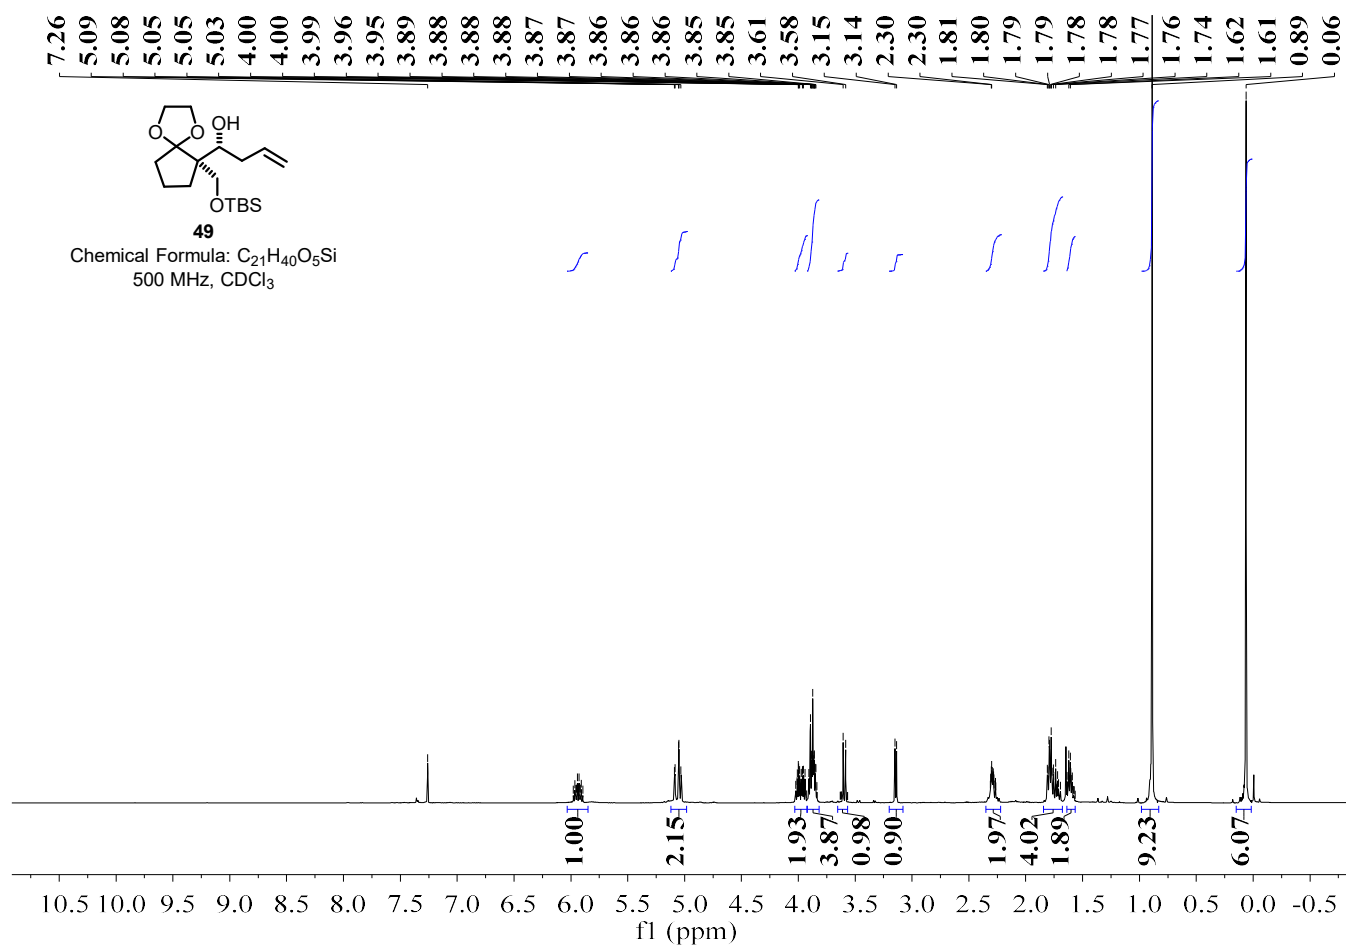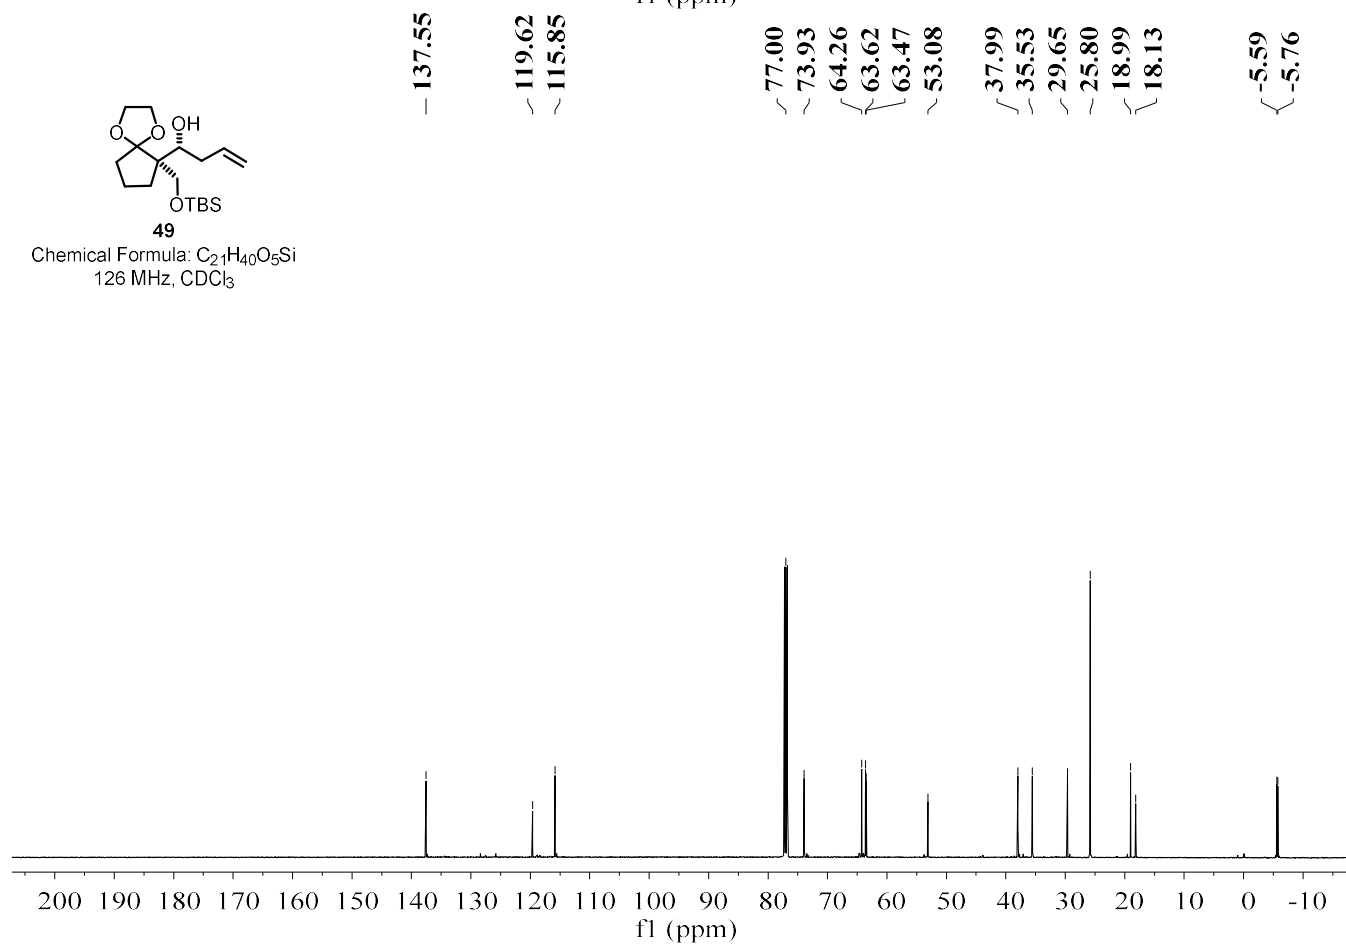

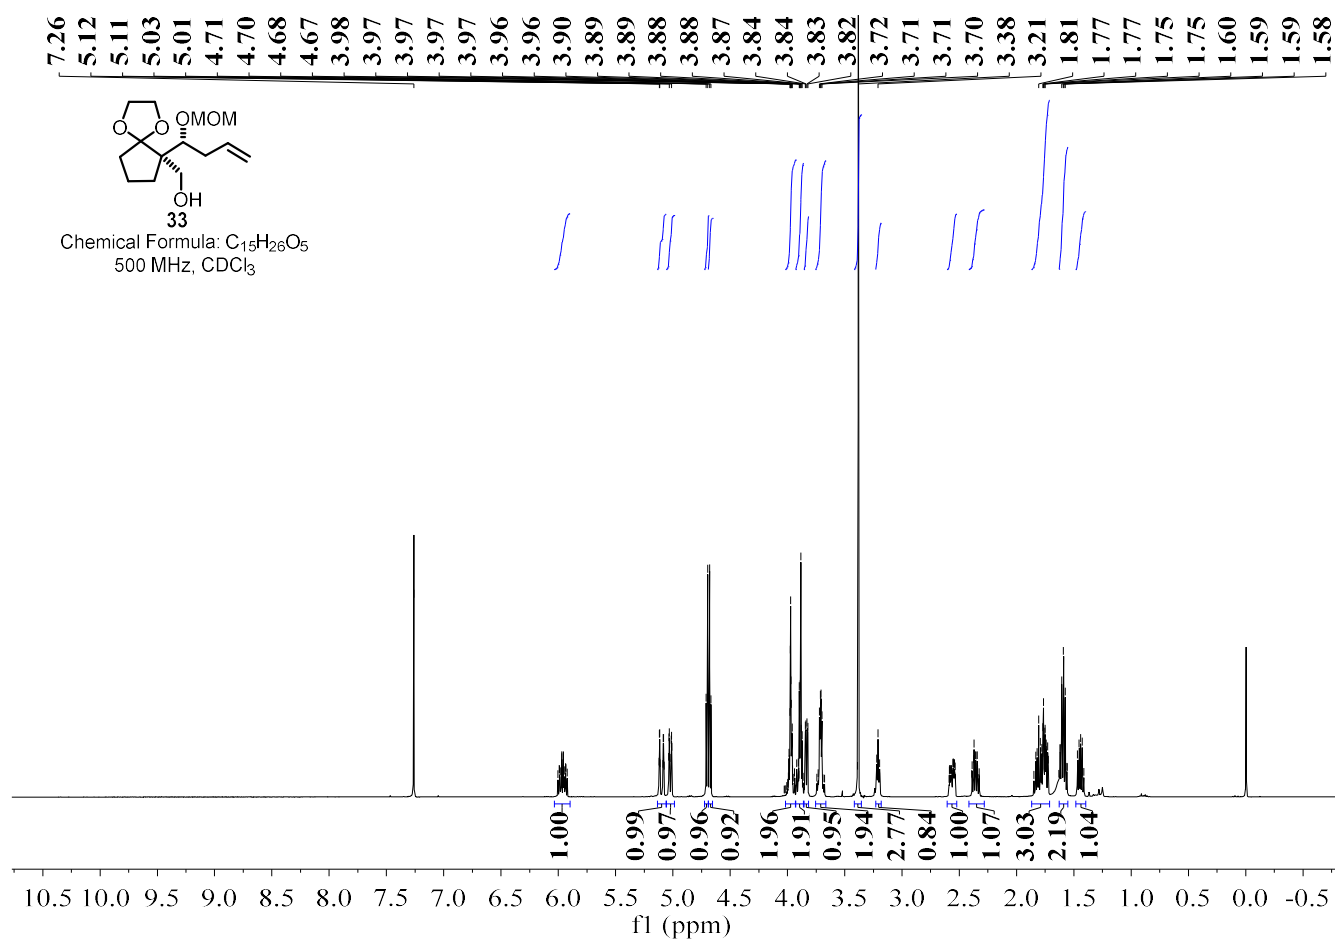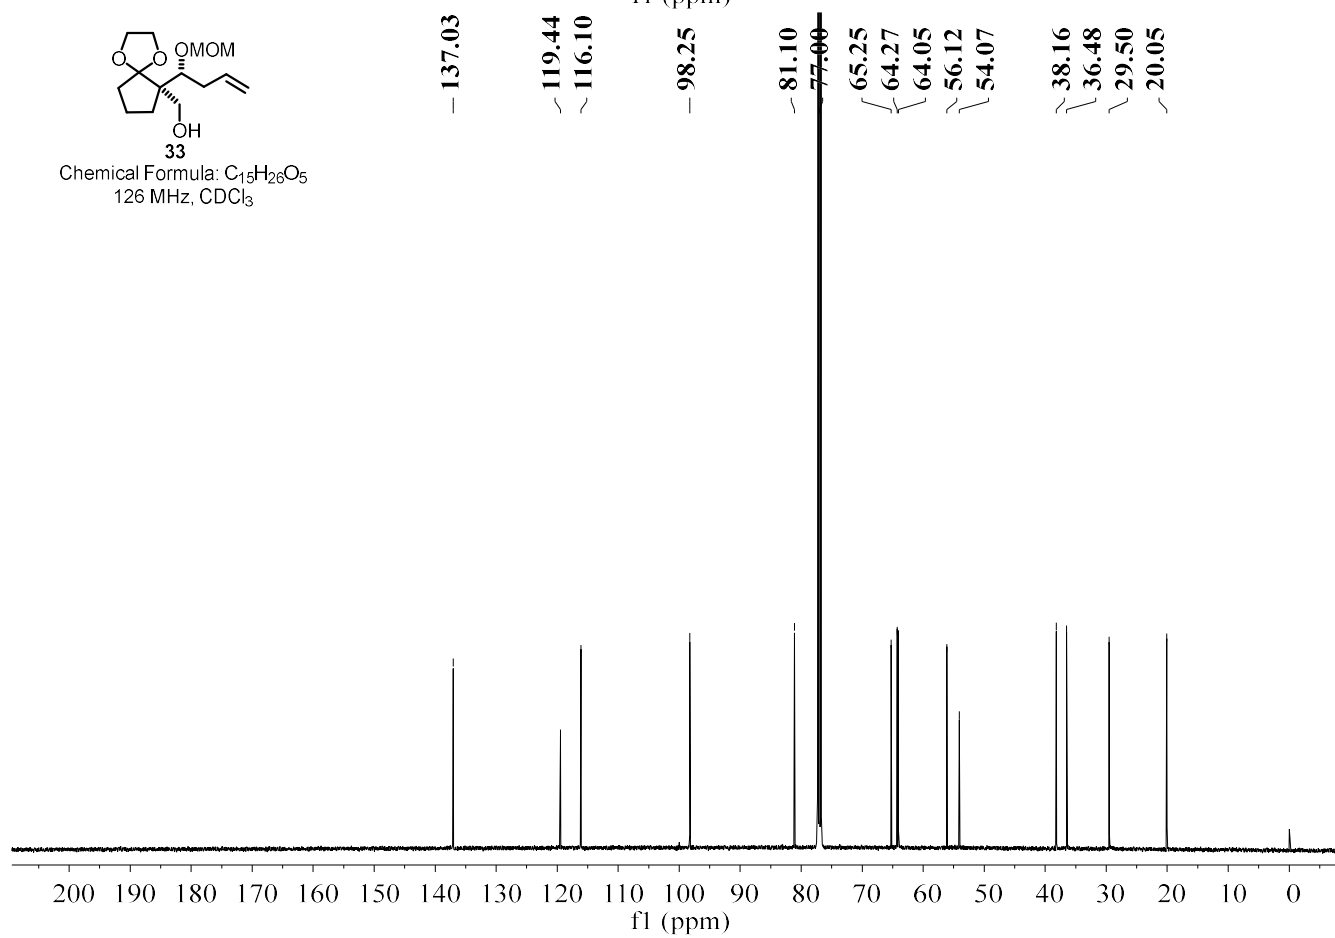

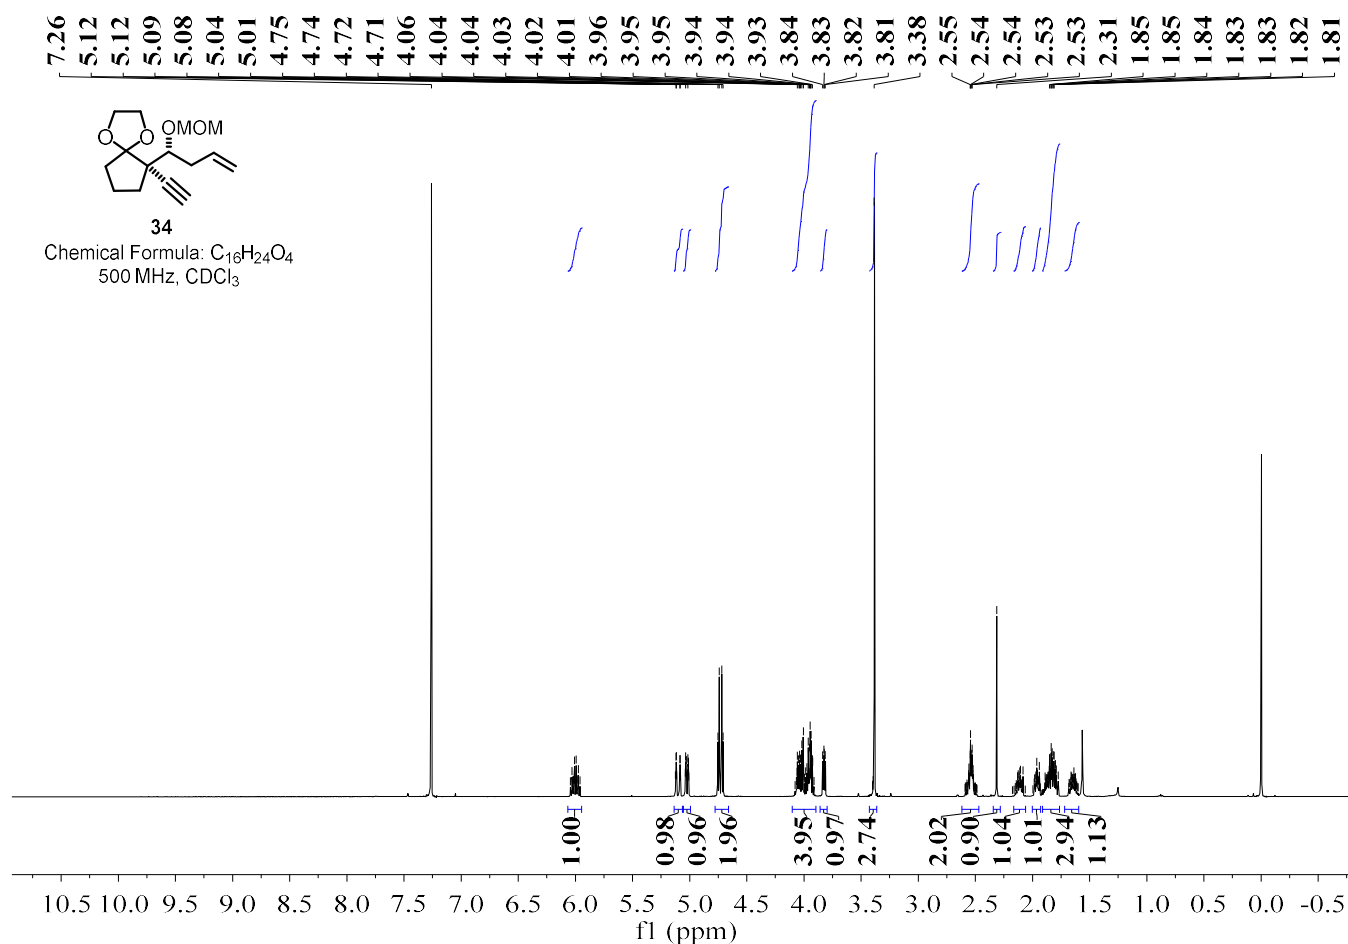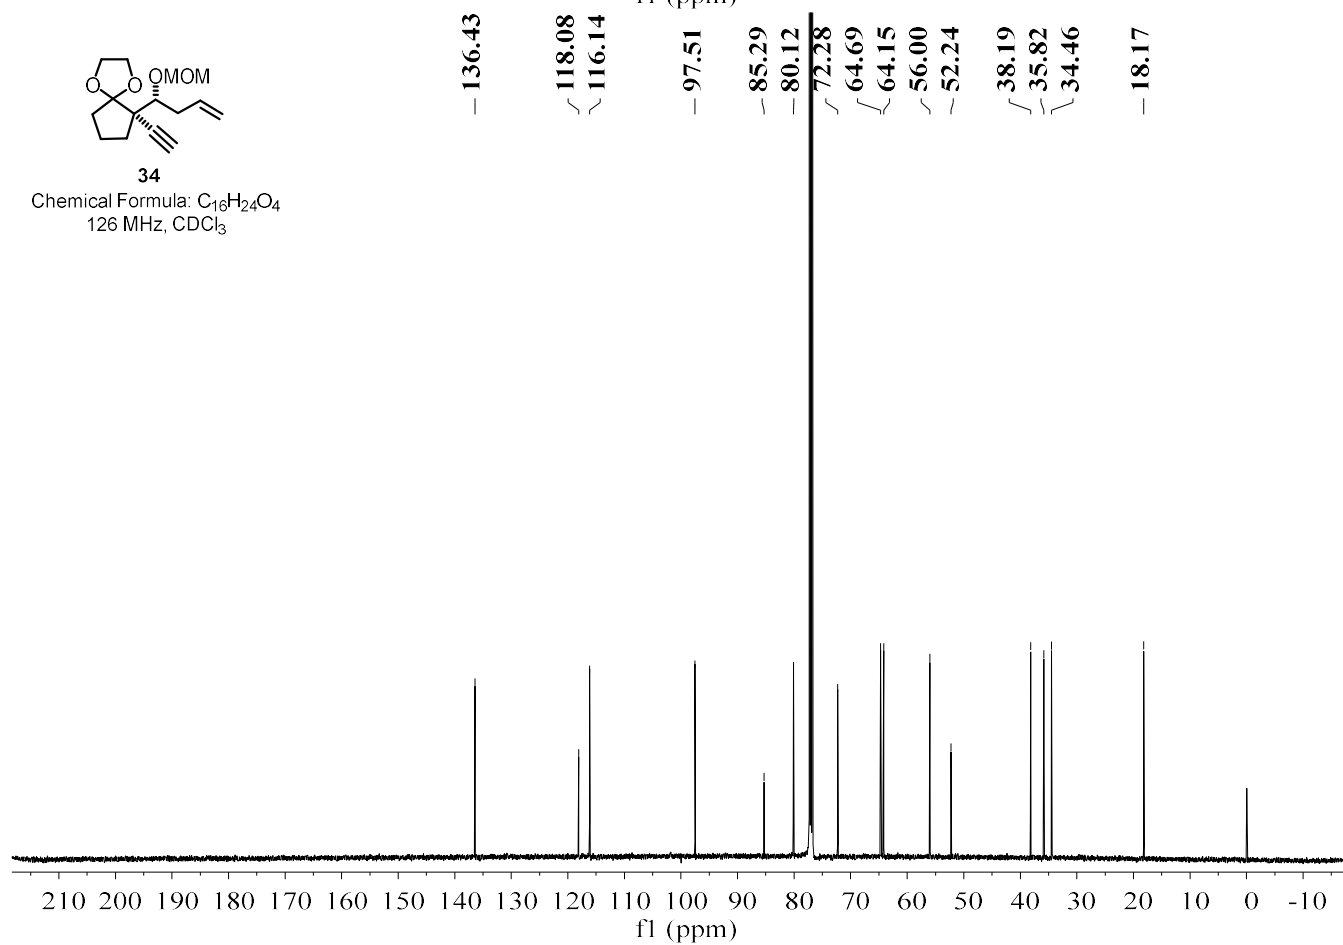

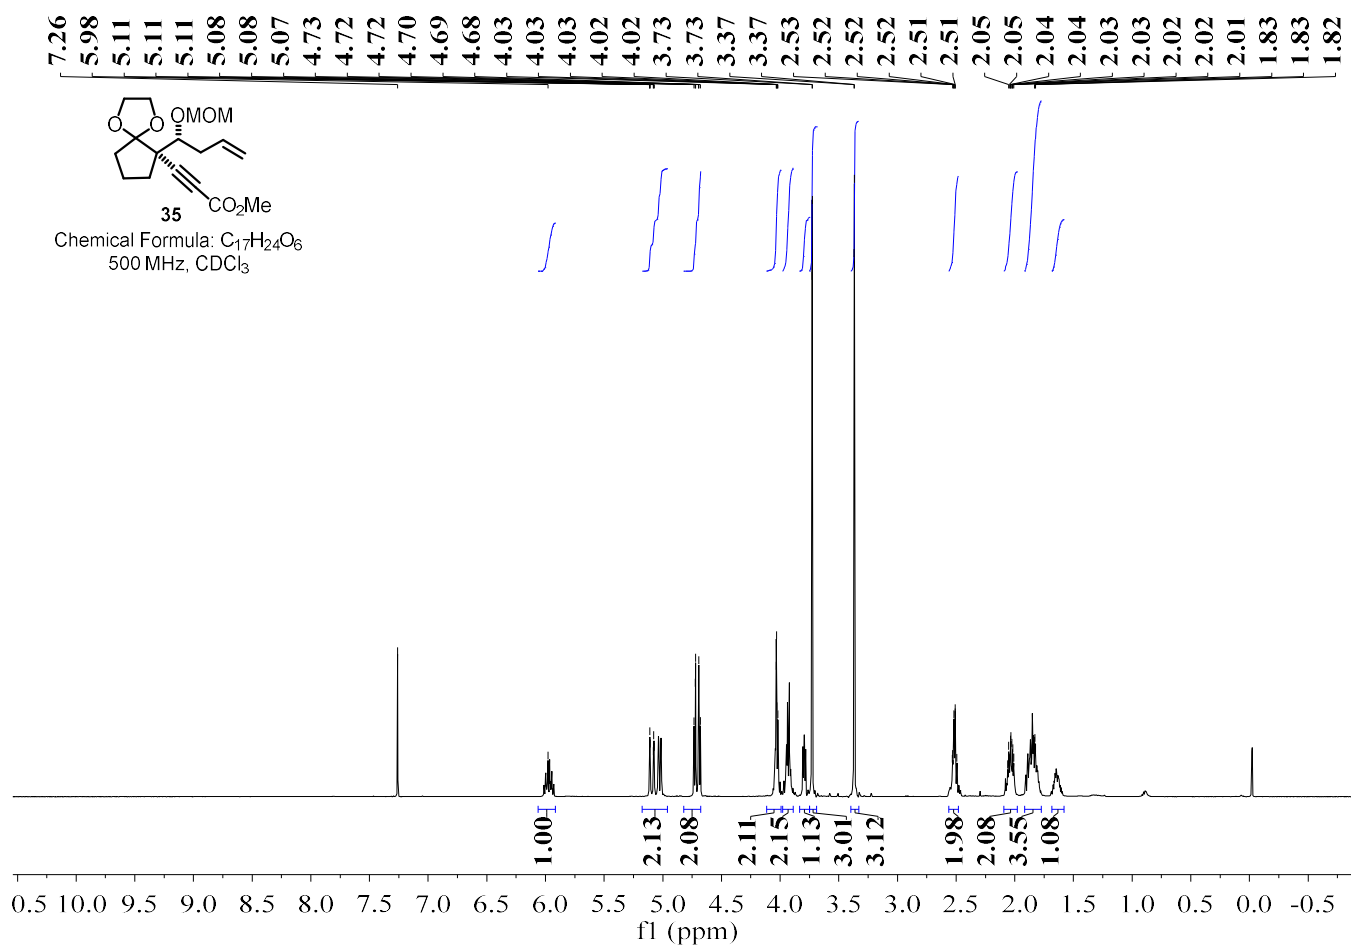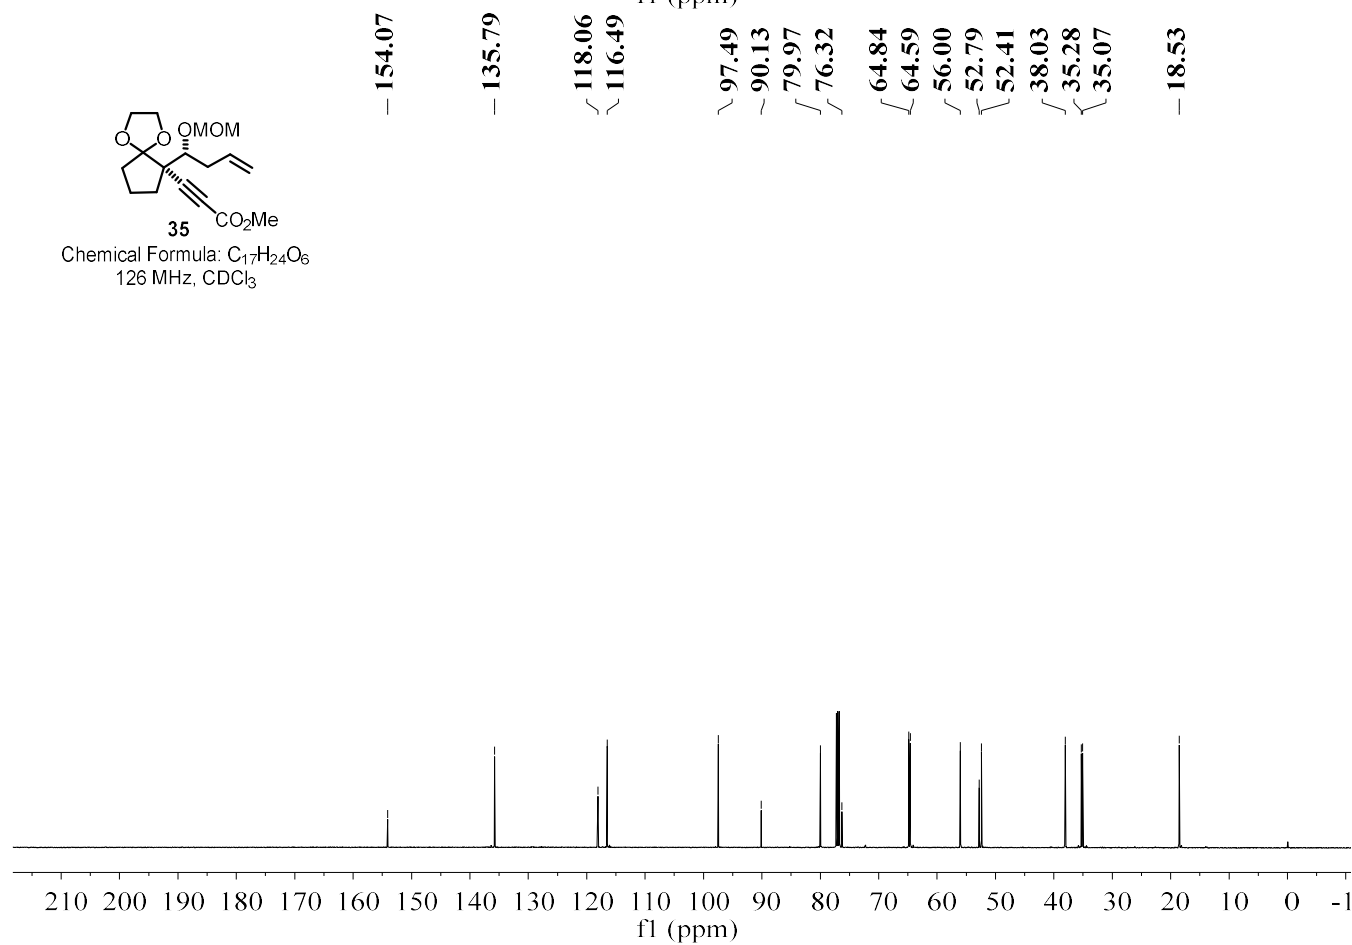

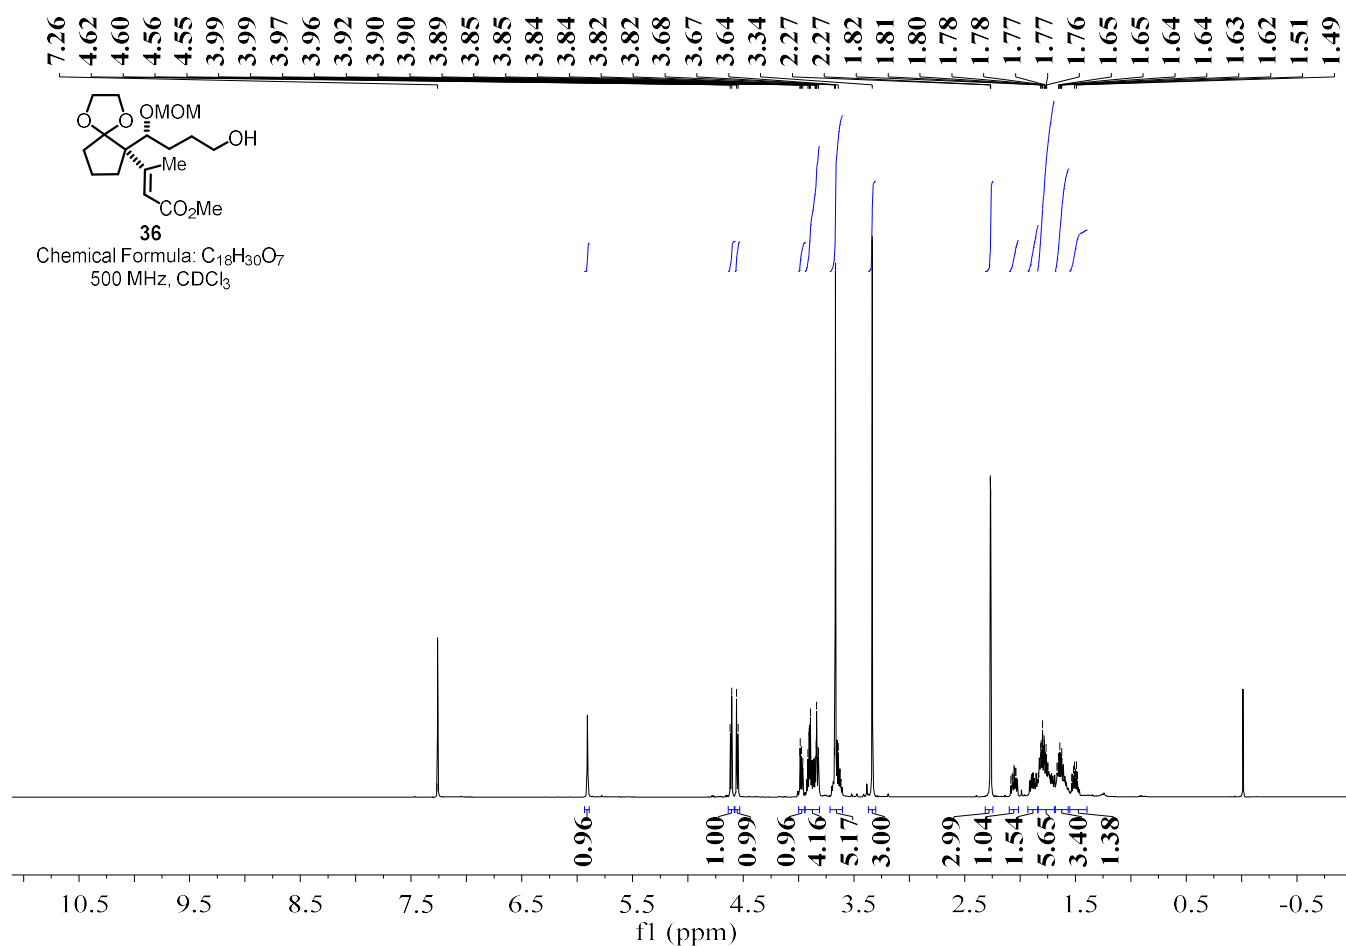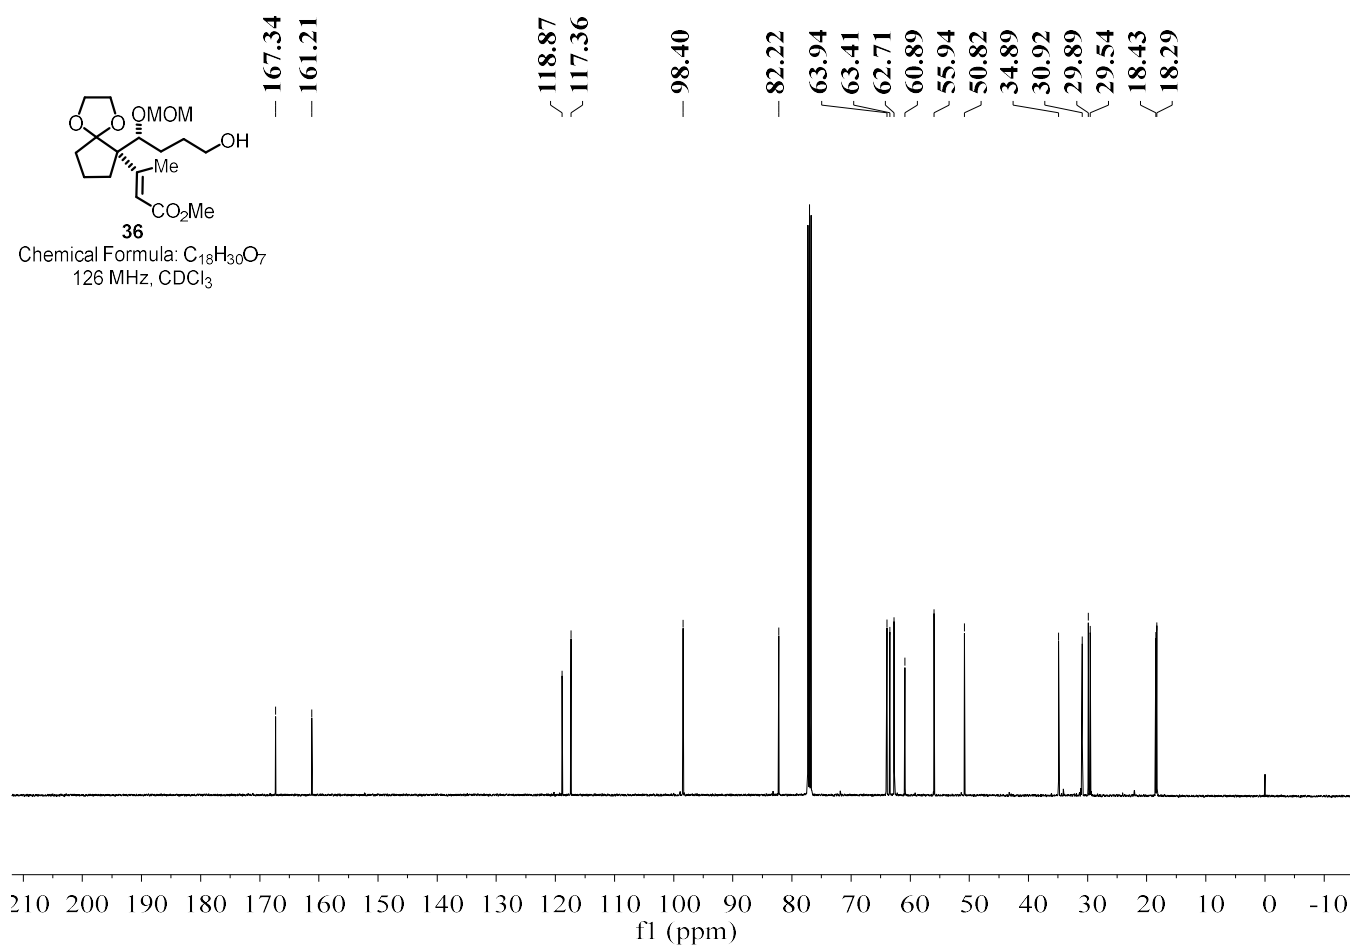

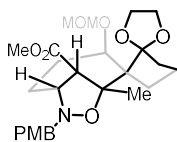

**38a**

Chemical Formula:  $C_{26}H_{37}NO_8$   
500M Hz, 298 K,  $CDCl_3$

7.40  
7.38  
6.85  
6.83

4.67  
4.66  
4.34  
4.31  
4.18  
4.15  
3.79  
3.74  
3.39

2.23  
2.22  
2.20  
1.65

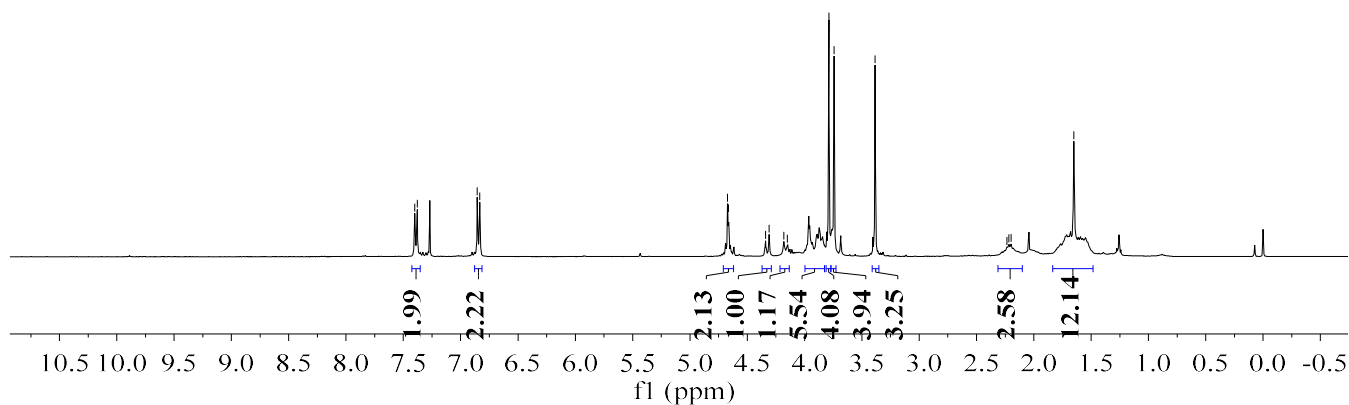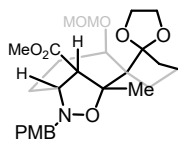

**38a**

Chemical Formula:  $C_{26}H_{37}NO_8$   
500M Hz, 333 K,  $CDCl_3$

7.38  
7.36  
6.85  
6.83  
4.66  
4.66  
4.31  
4.29  
4.19  
4.17  
3.99  
3.97  
3.97  
3.96  
3.95  
3.87  
3.87  
3.86  
3.85  
3.84  
3.79  
3.77  
3.76  
3.76  
3.74  
2.23  
1.78  
1.74  
1.74  
1.74  
1.73  
1.72  
1.71  
1.70  
1.69  
1.65  
1.61  
1.60  
1.60  
1.53  
1.51

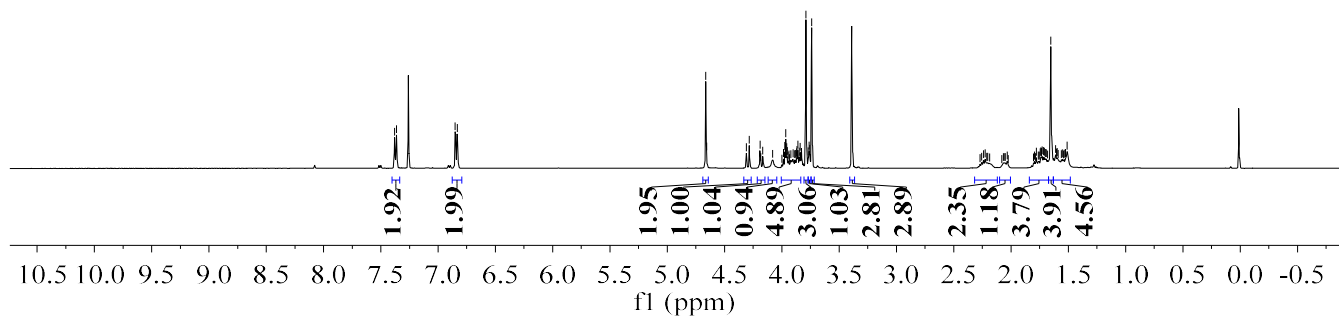

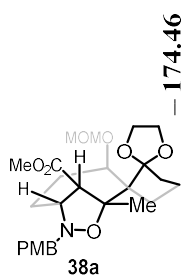

Chemical Formula:  $C_{26}H_{37}NO_8$   
126M Hz, 298 K,  $CDCl_3$

174.46  
158.56  
130.64  
130.41  
119.69  
113.53  
98.36  
98.11  
63.70  
56.64  
56.18  
55.20  
51.78  
38.60  
33.23

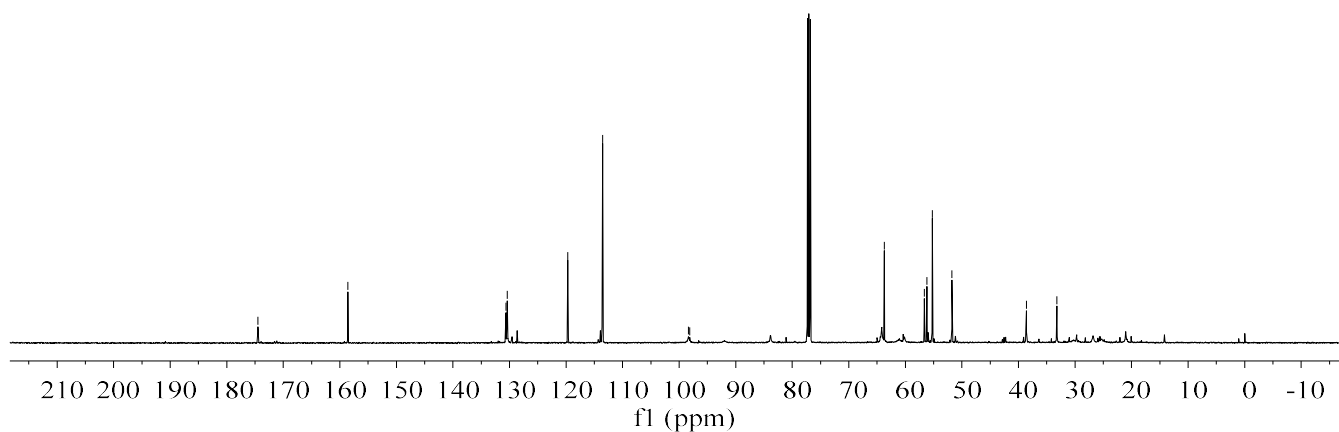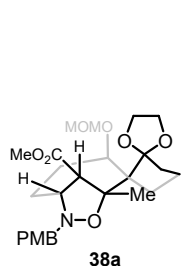

Chemical Formula:  $C_{26}H_{37}NO_8$   
126M Hz, 333 K,  $CDCl_3$

174.36  
158.78  
130.99  
130.34  
128.49  
119.90  
114.35  
113.71  
98.43  
83.88  
64.62  
64.13  
63.69  
60.76  
60.45  
56.56  
56.39  
55.35  
55.26  
51.54  
38.62  
33.32  
29.65  
26.76  
25.20  
20.98

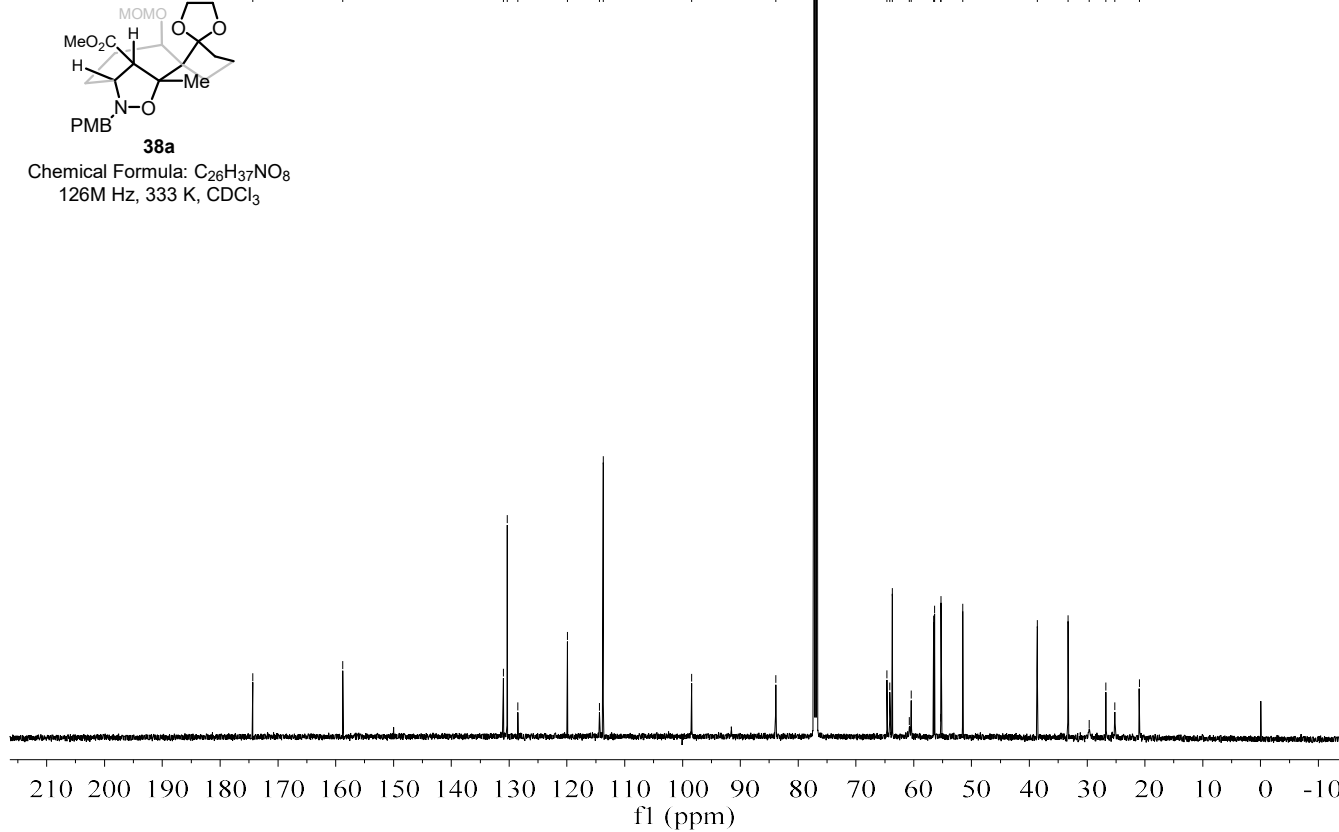

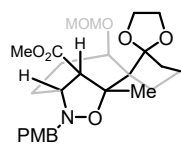

Dept 135 of **38a**

Chemical Formula:  $C_{26}H_{37}NO_8$   
126M Hz, 333 K,  $CDCl_3$

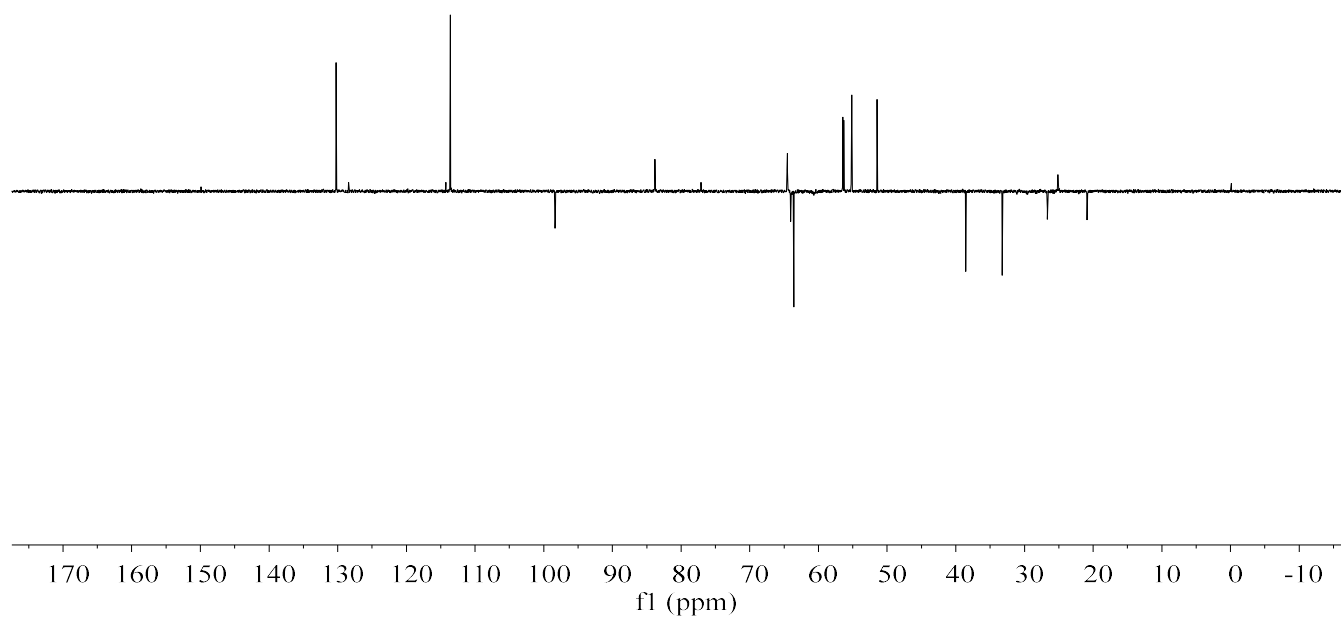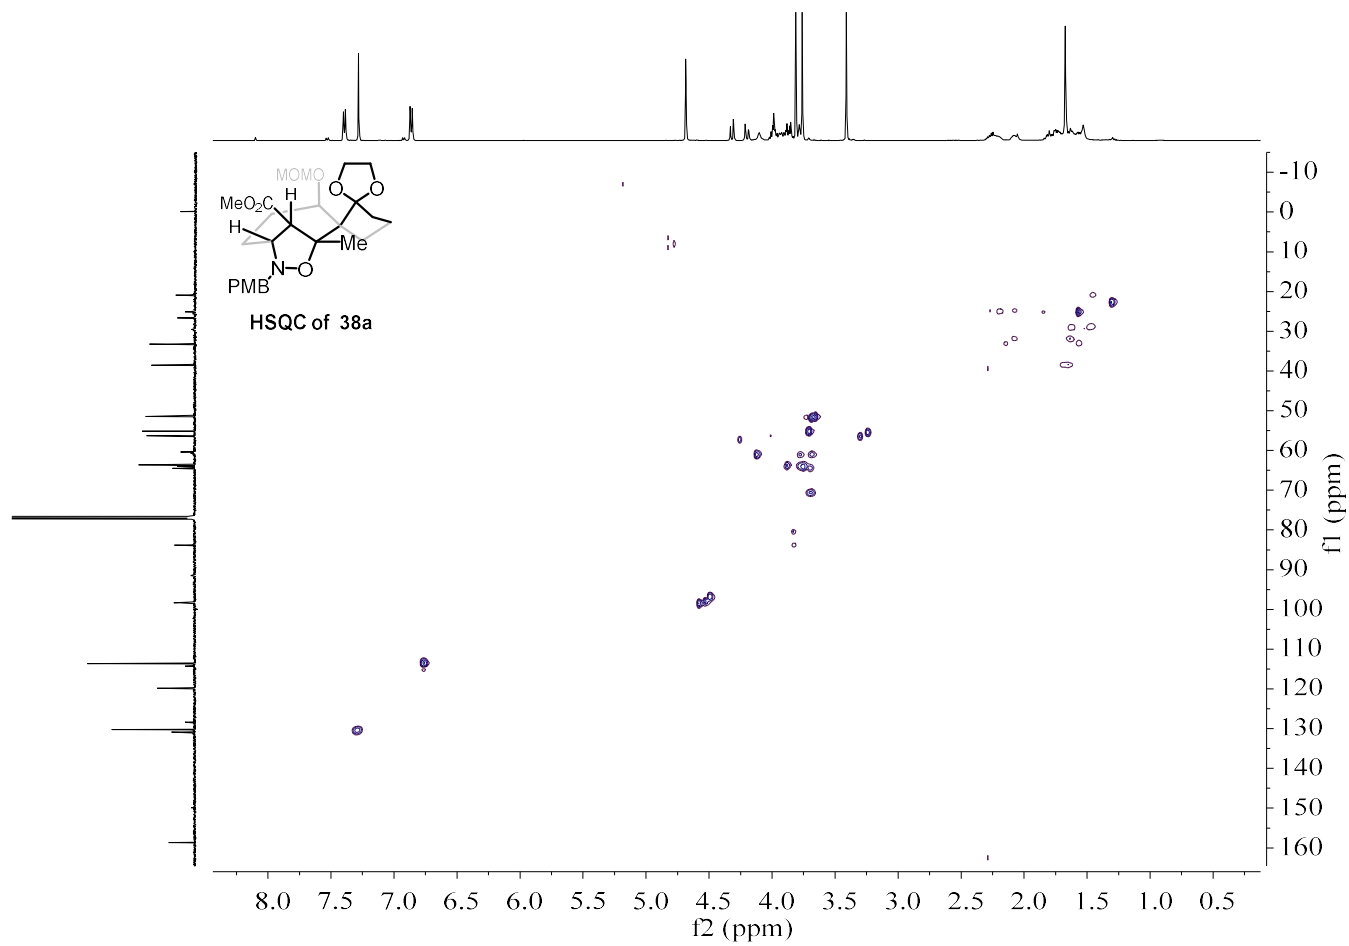



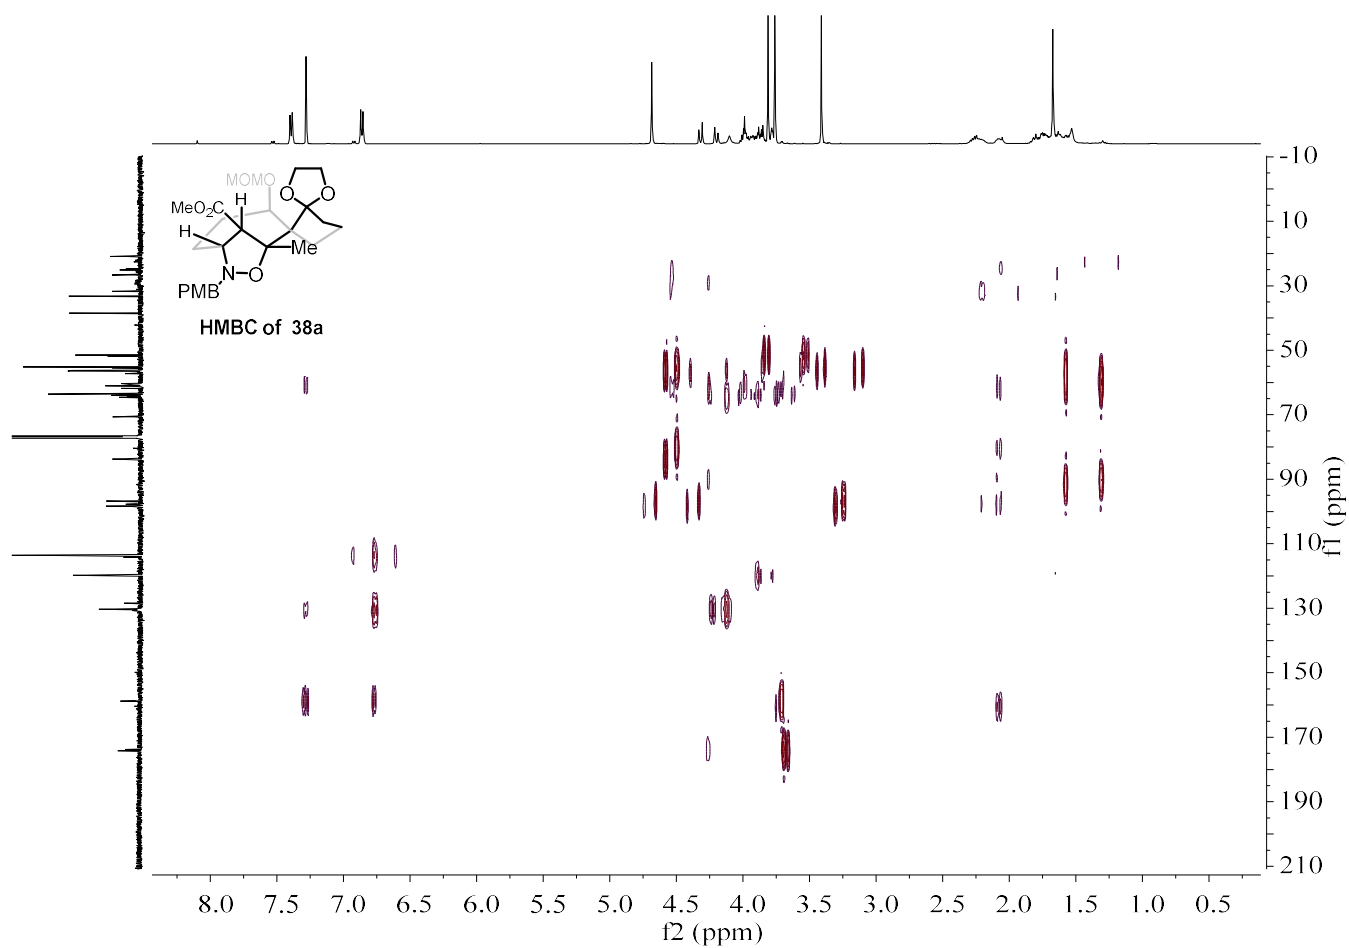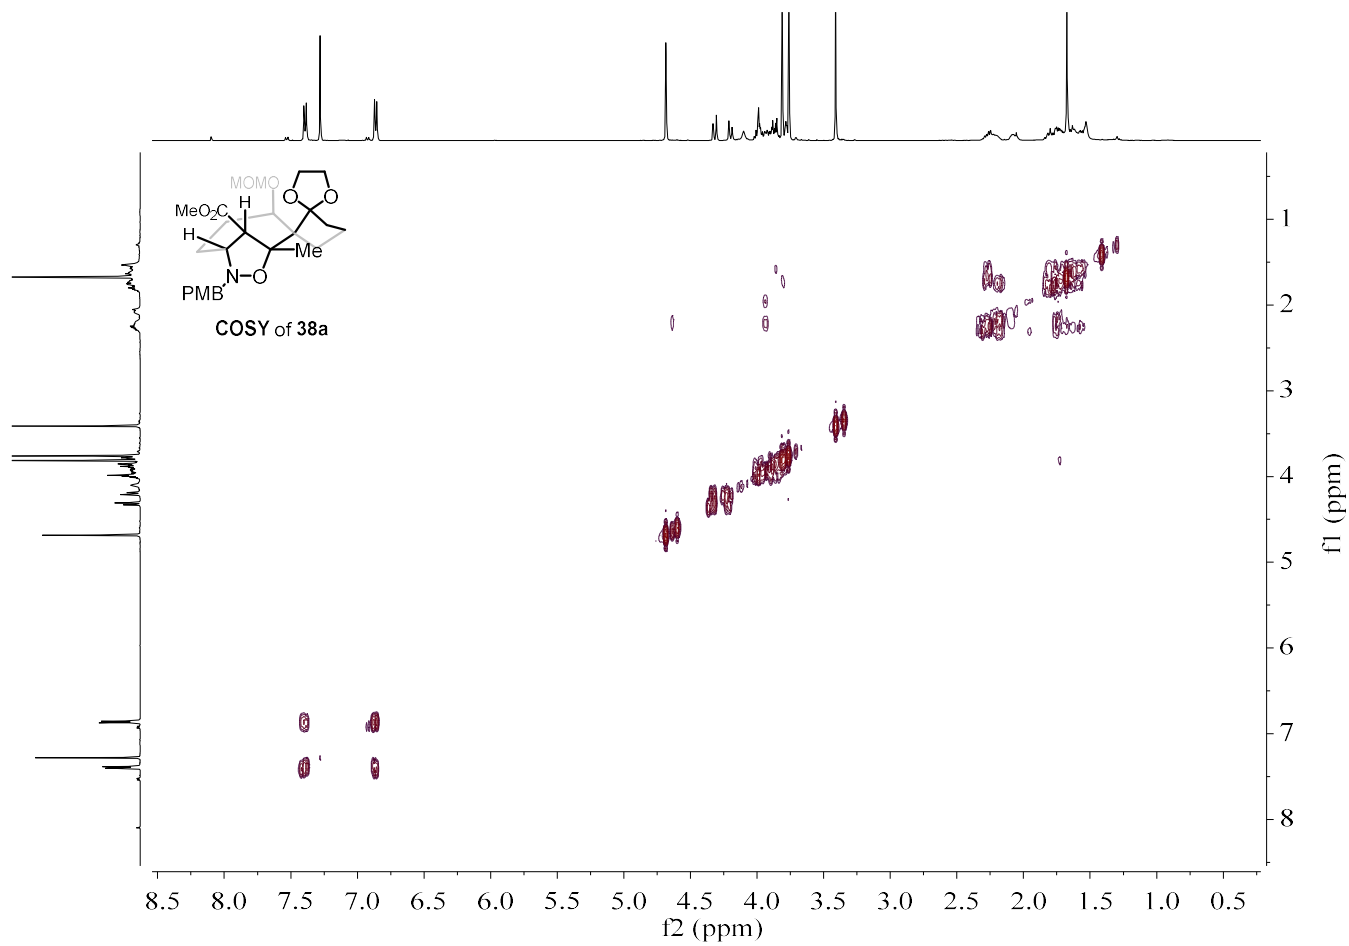

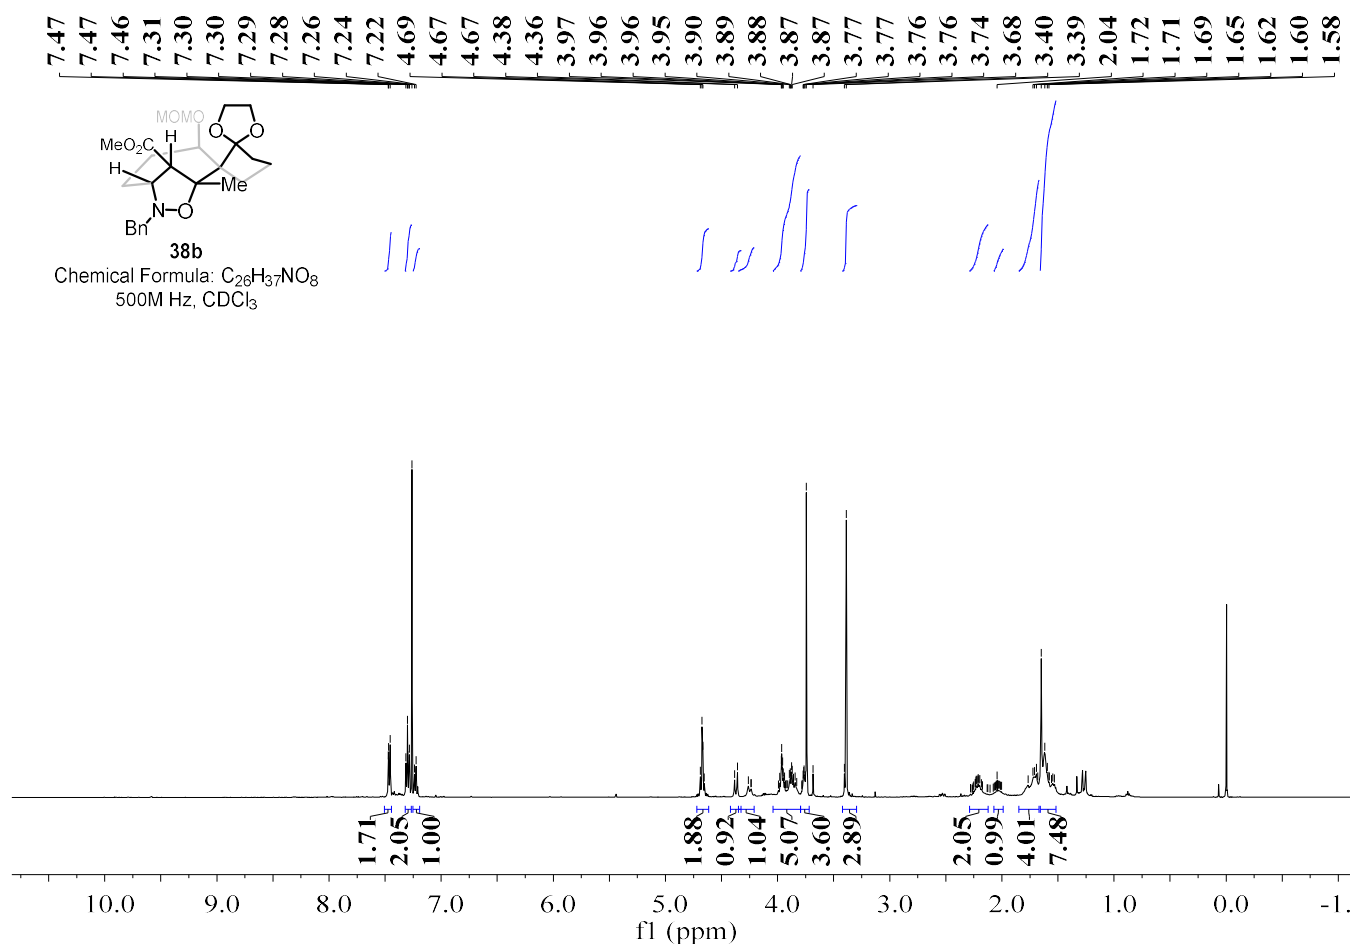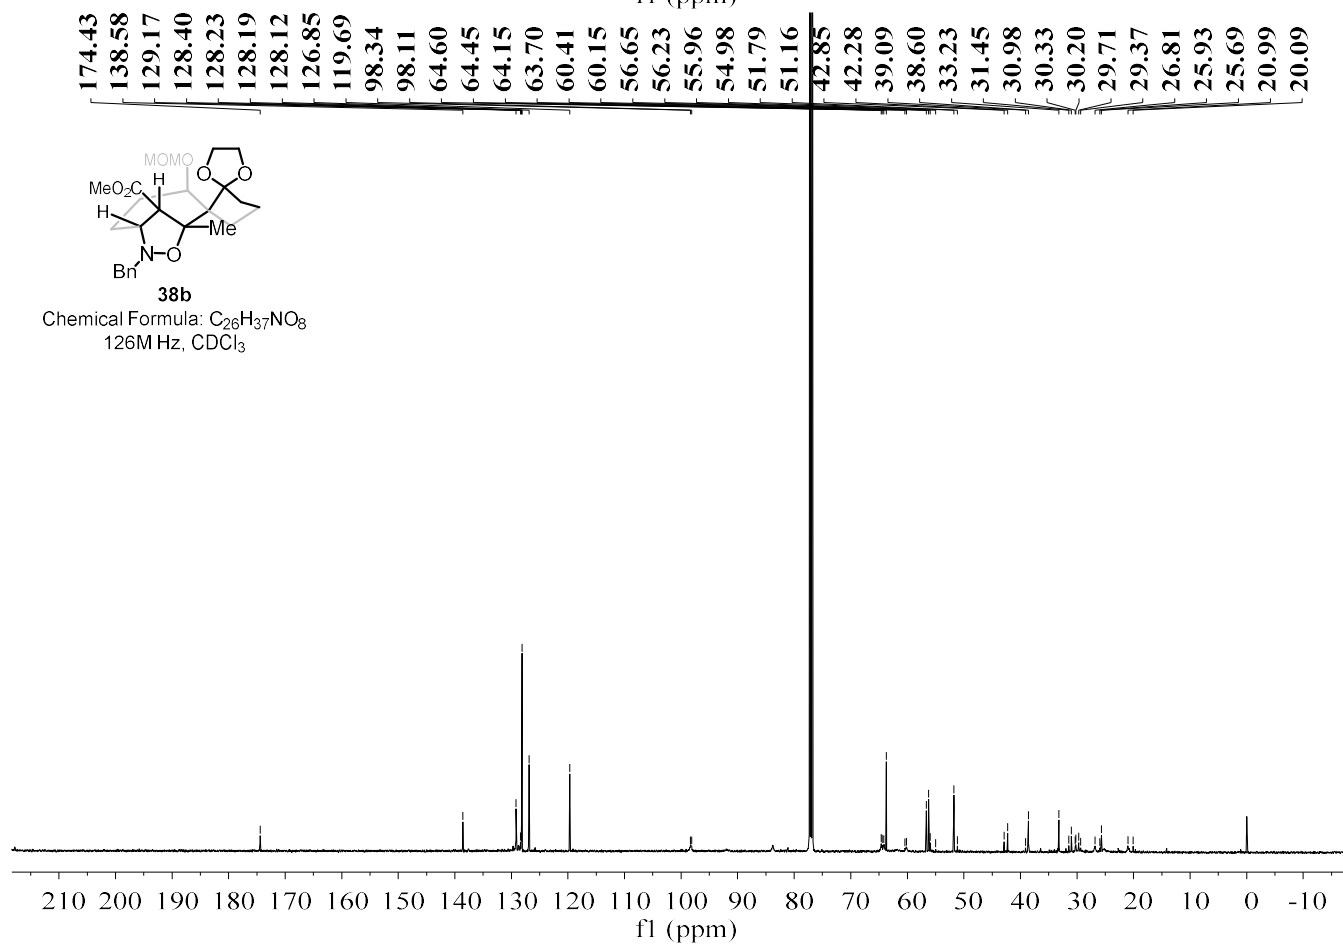

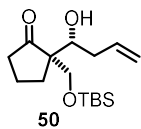

Chemical Formula:  $C_{16}H_{30}O_3Si$   
400 MHz,  $CDCl_3$

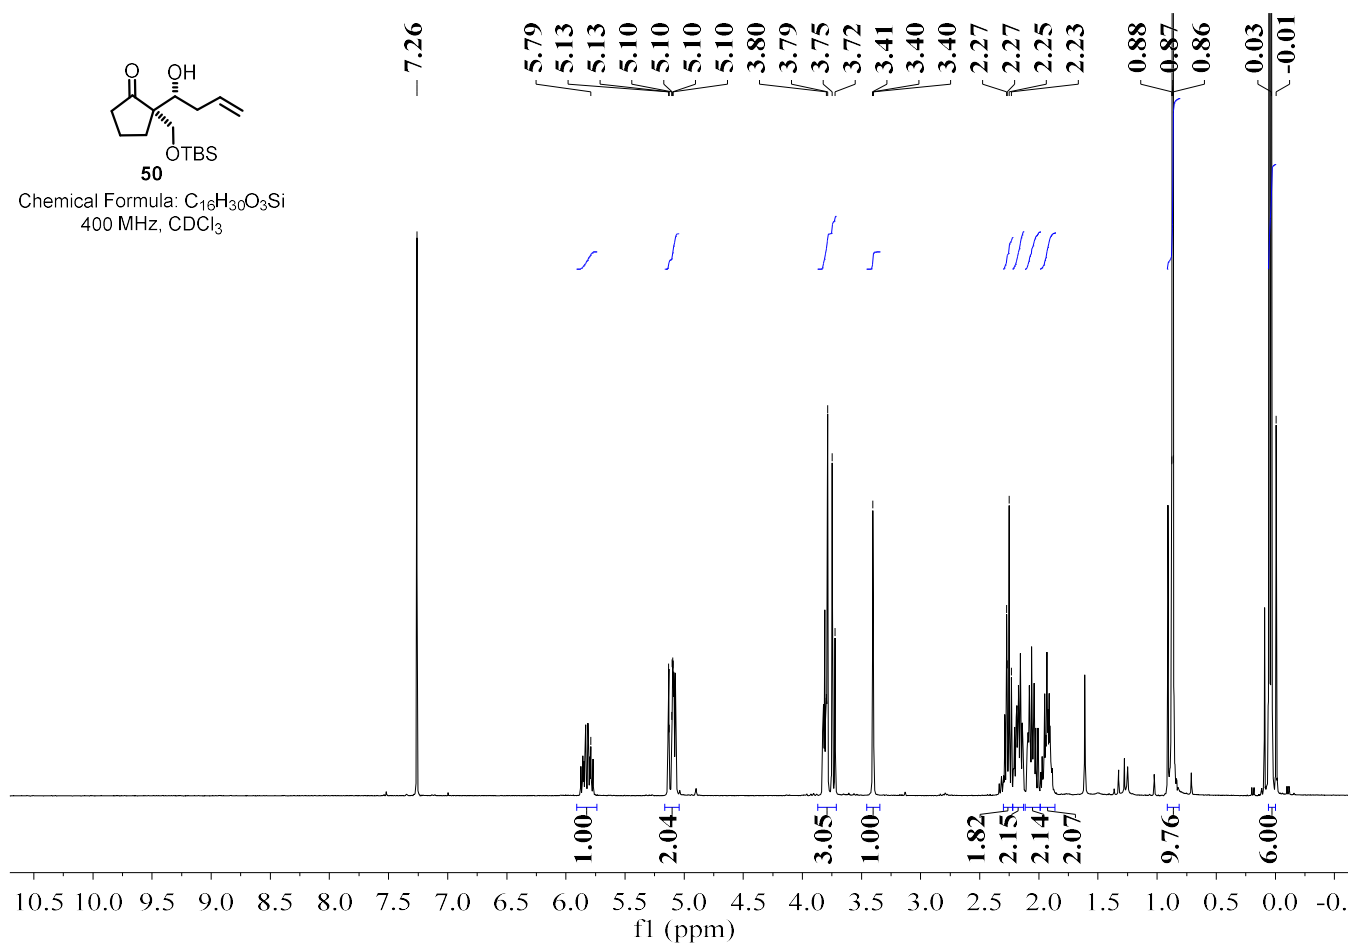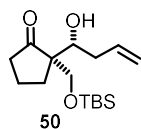

Chemical Formula:  $C_{16}H_{30}O_3Si$   
101 MHz,  $CDCl_3$

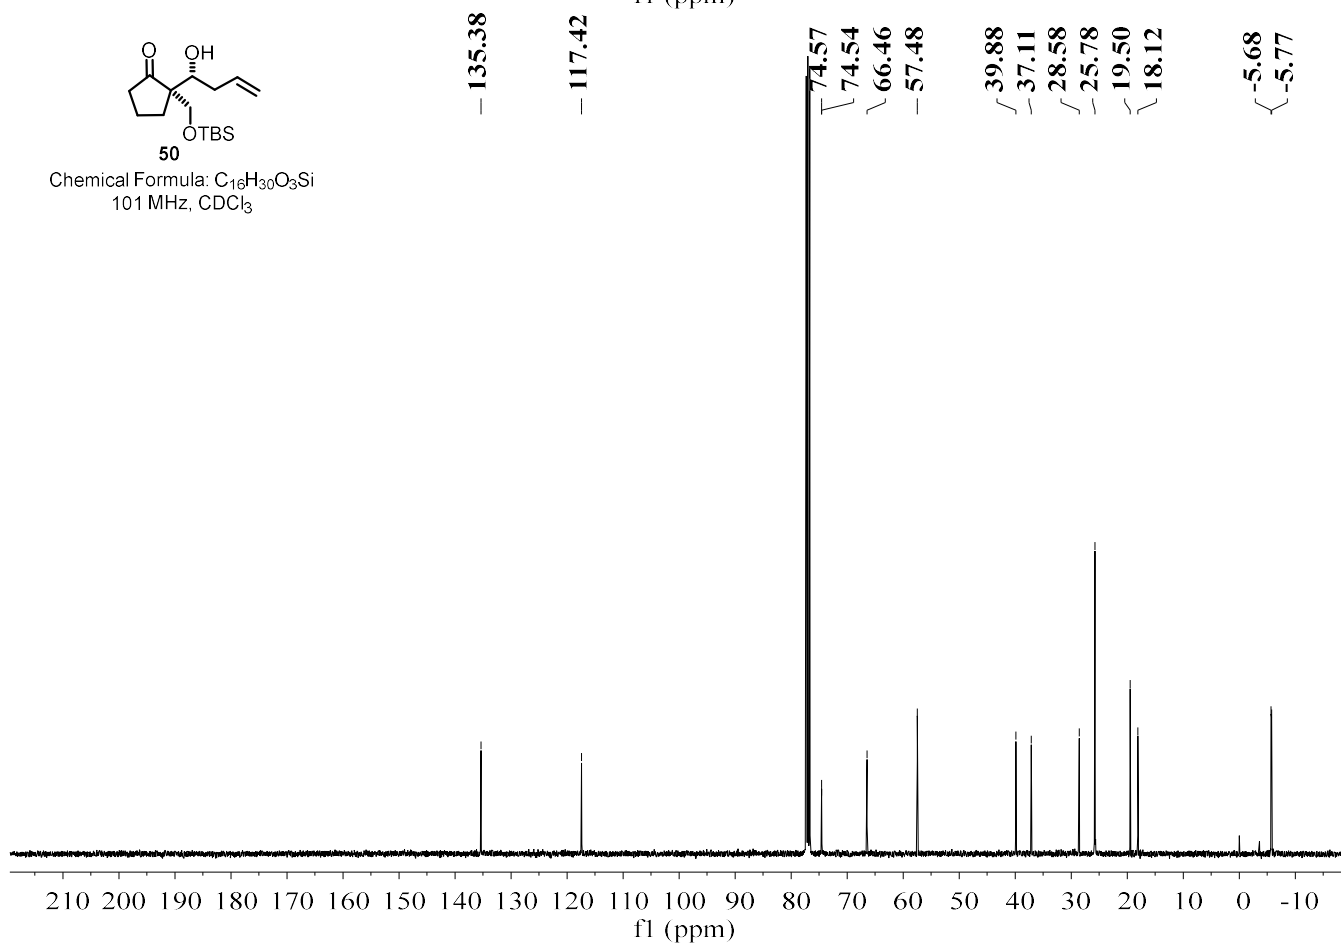

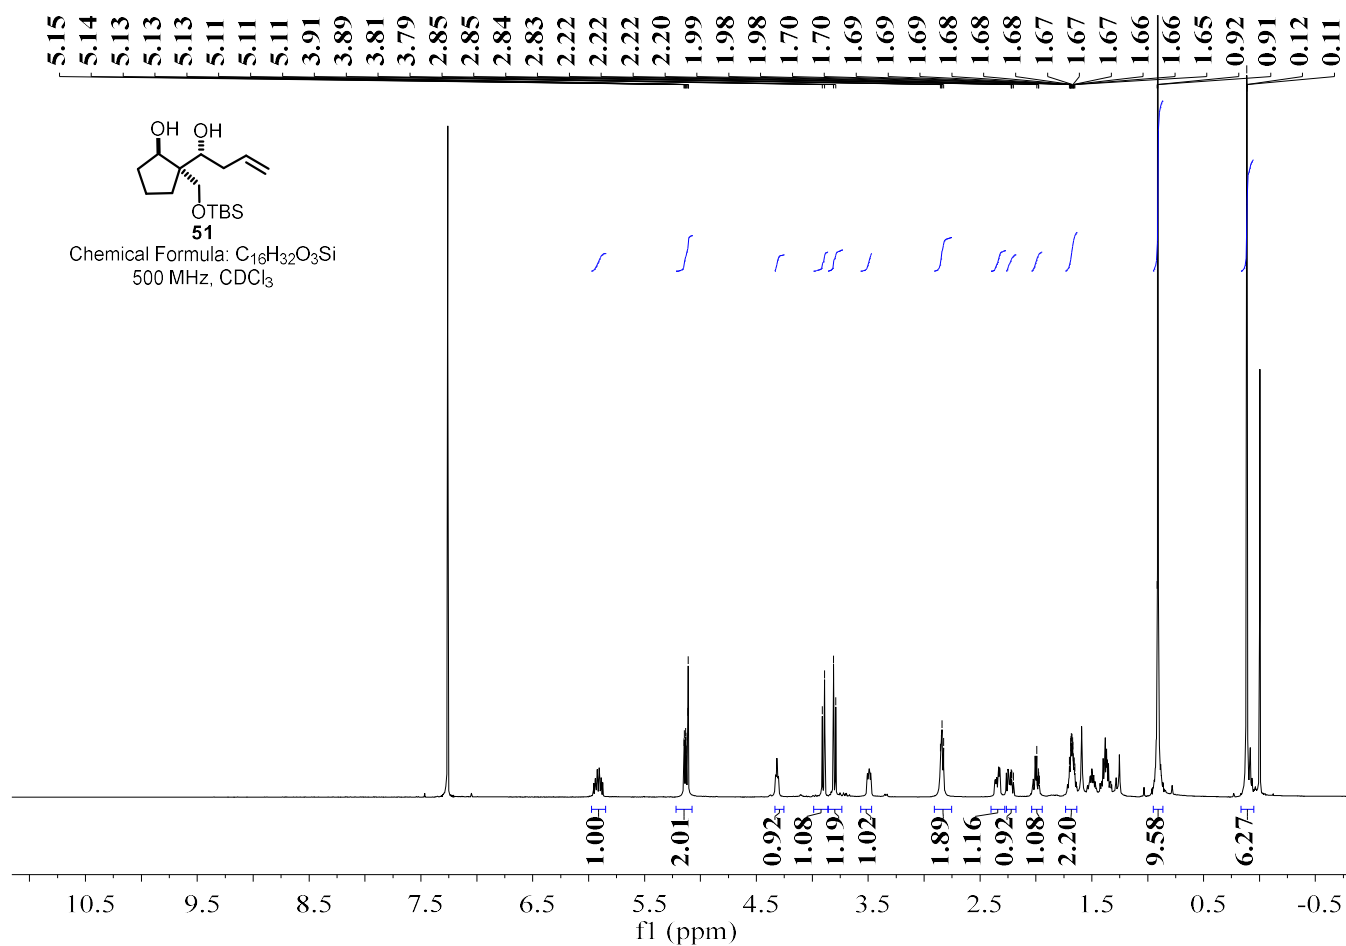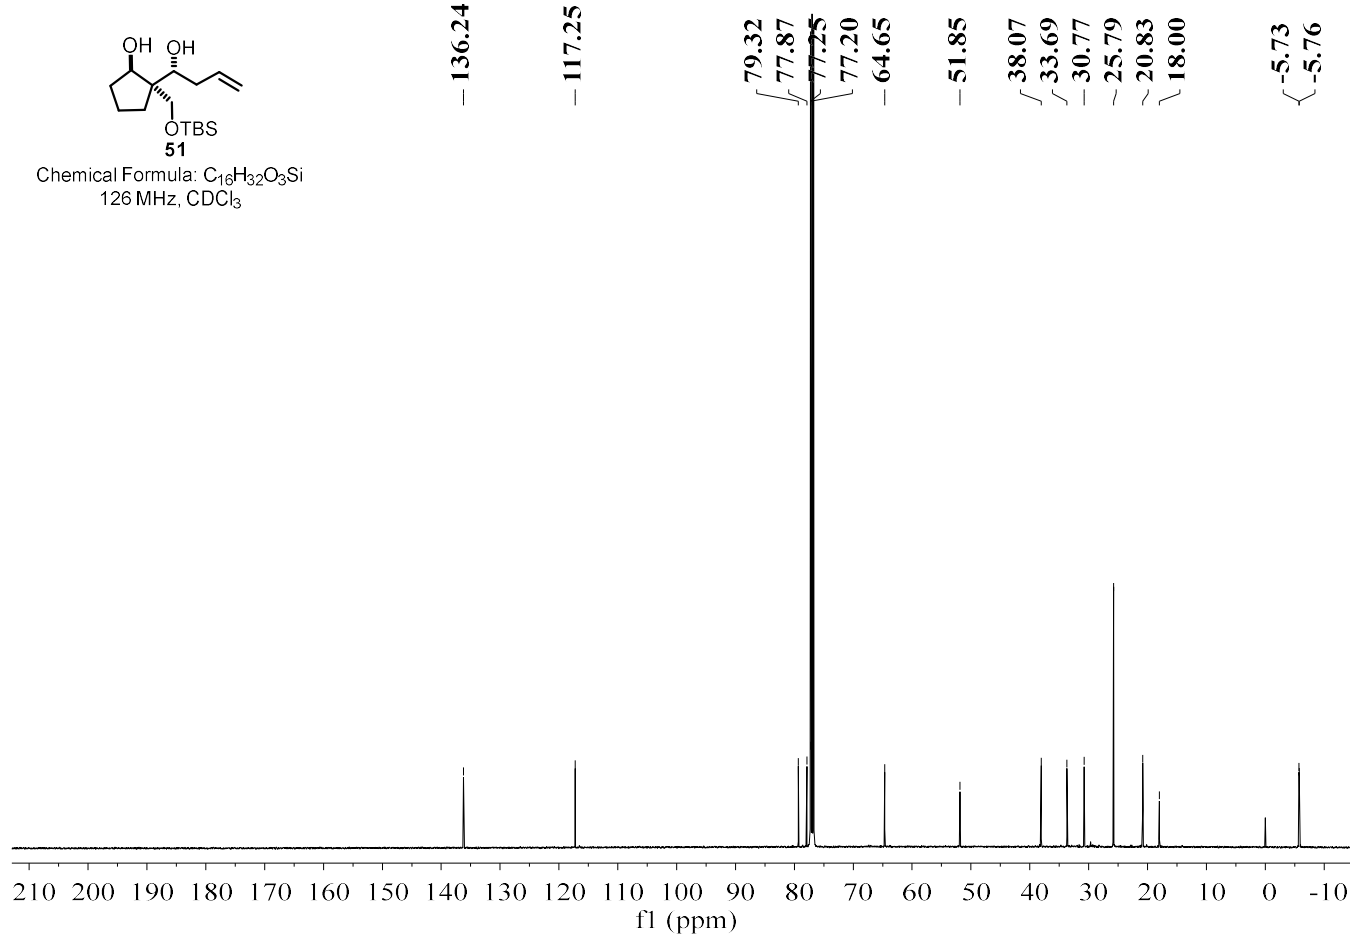

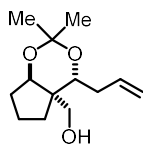

**30**

Chemical Formula:  $C_{13}H_{22}O_3$   
500 MHz,  $CDCl_3$

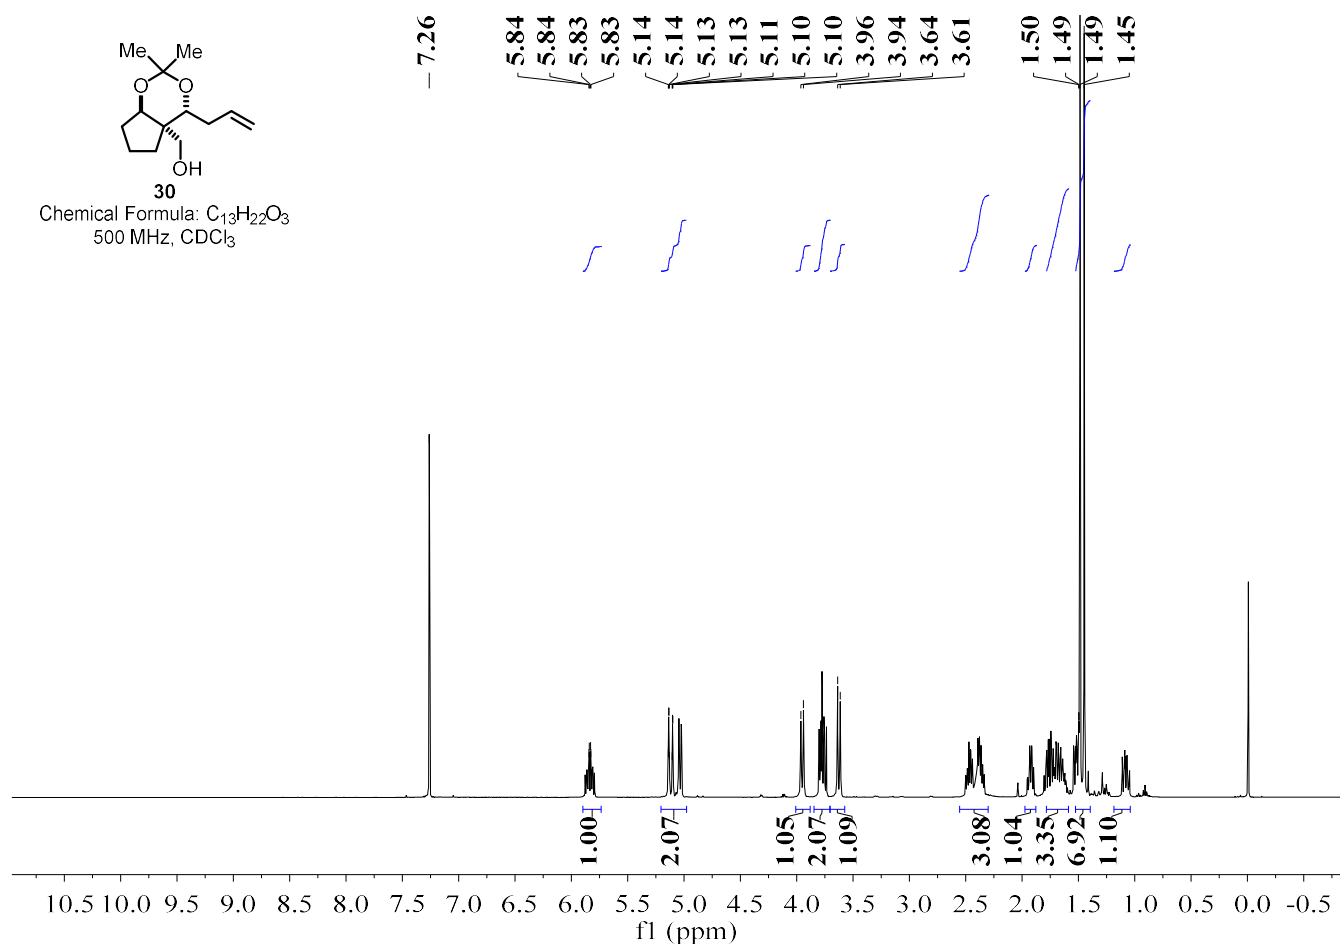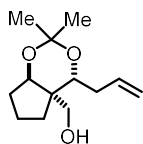

**30**

Chemical Formula:  $C_{13}H_{22}O_3$   
126 MHz,  $CDCl_3$

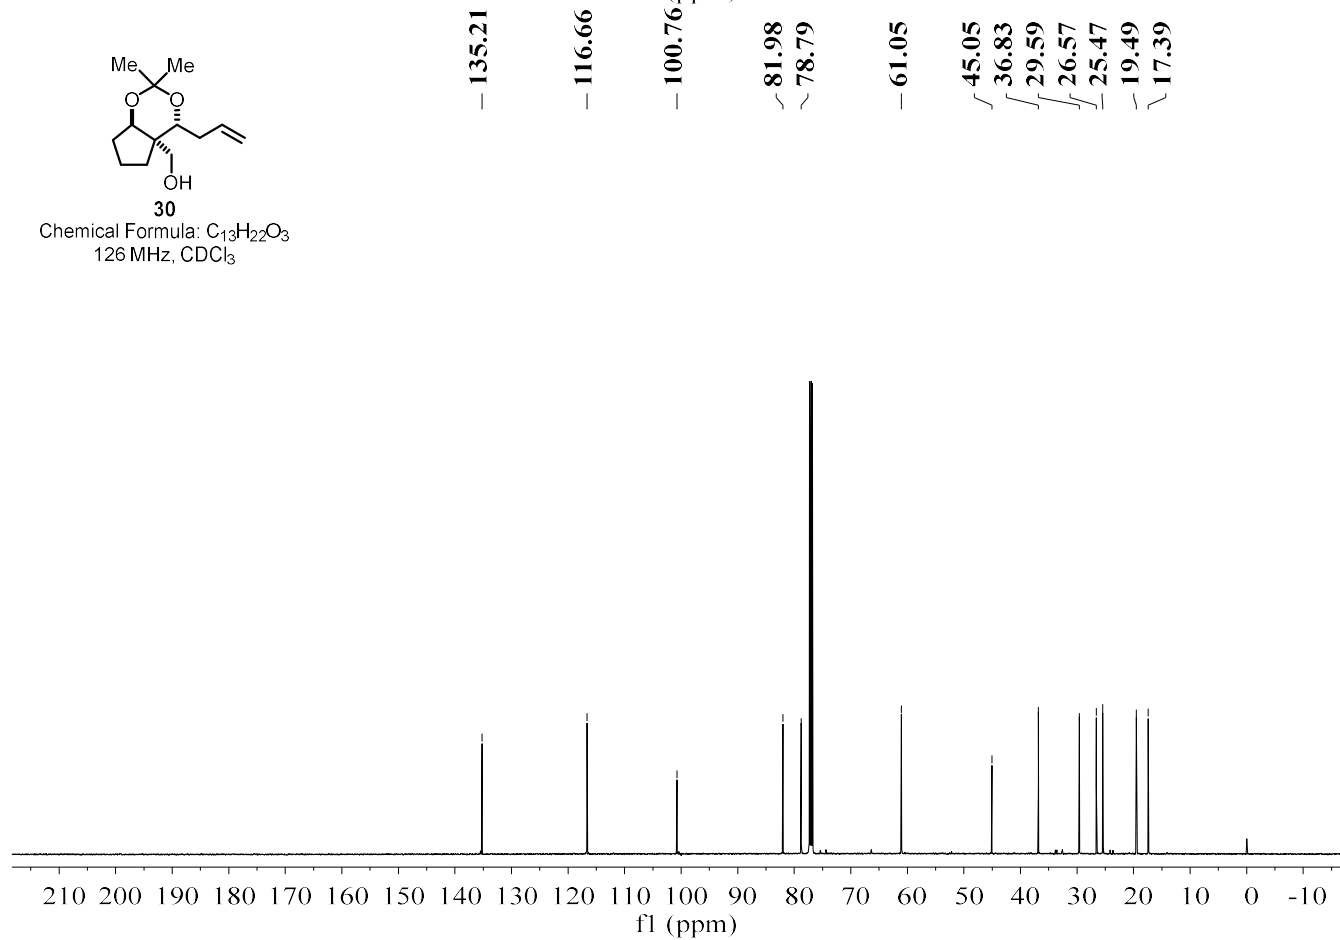

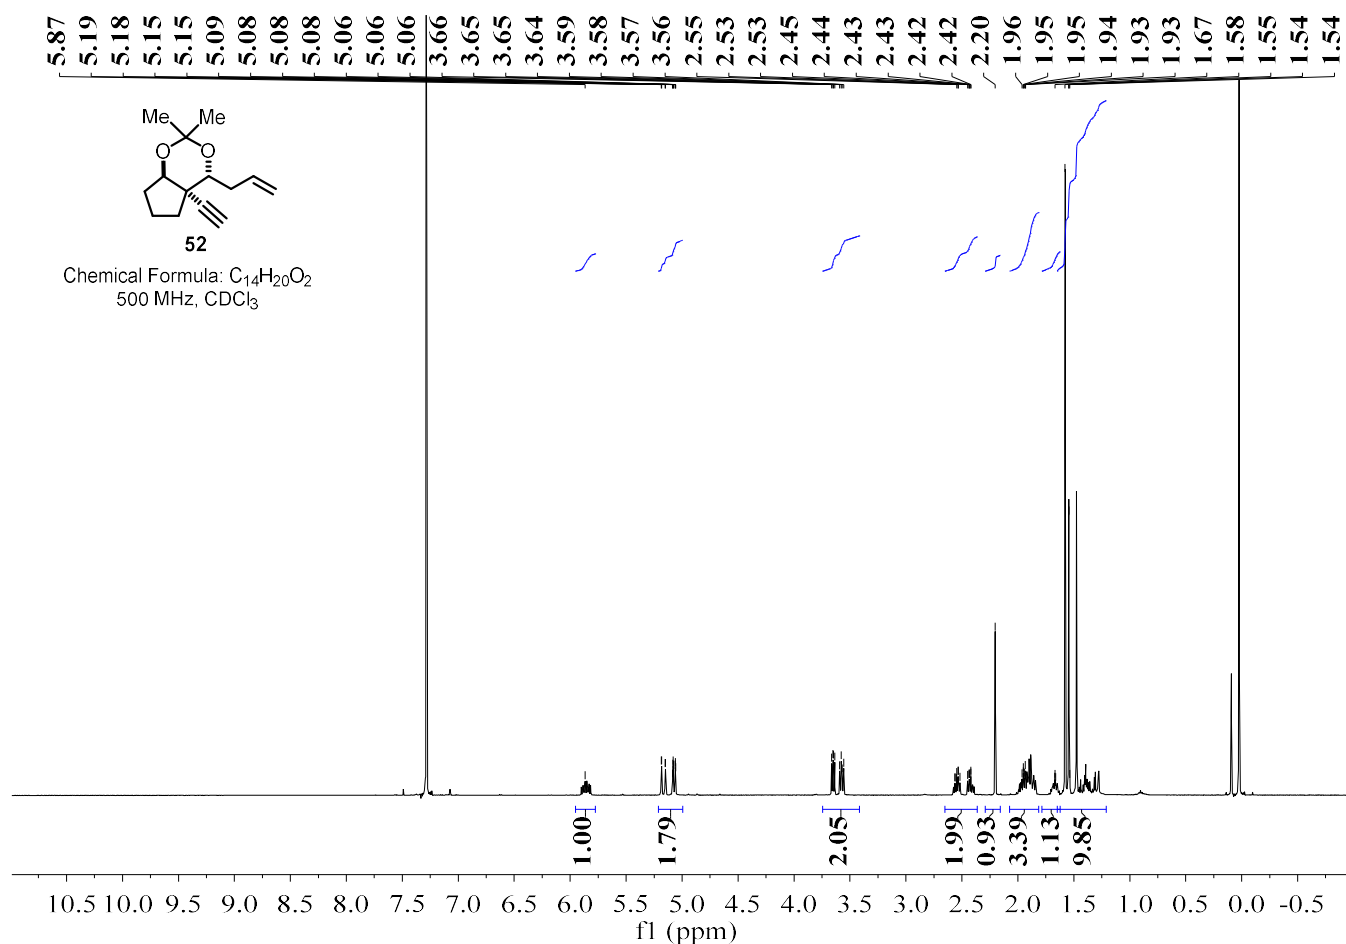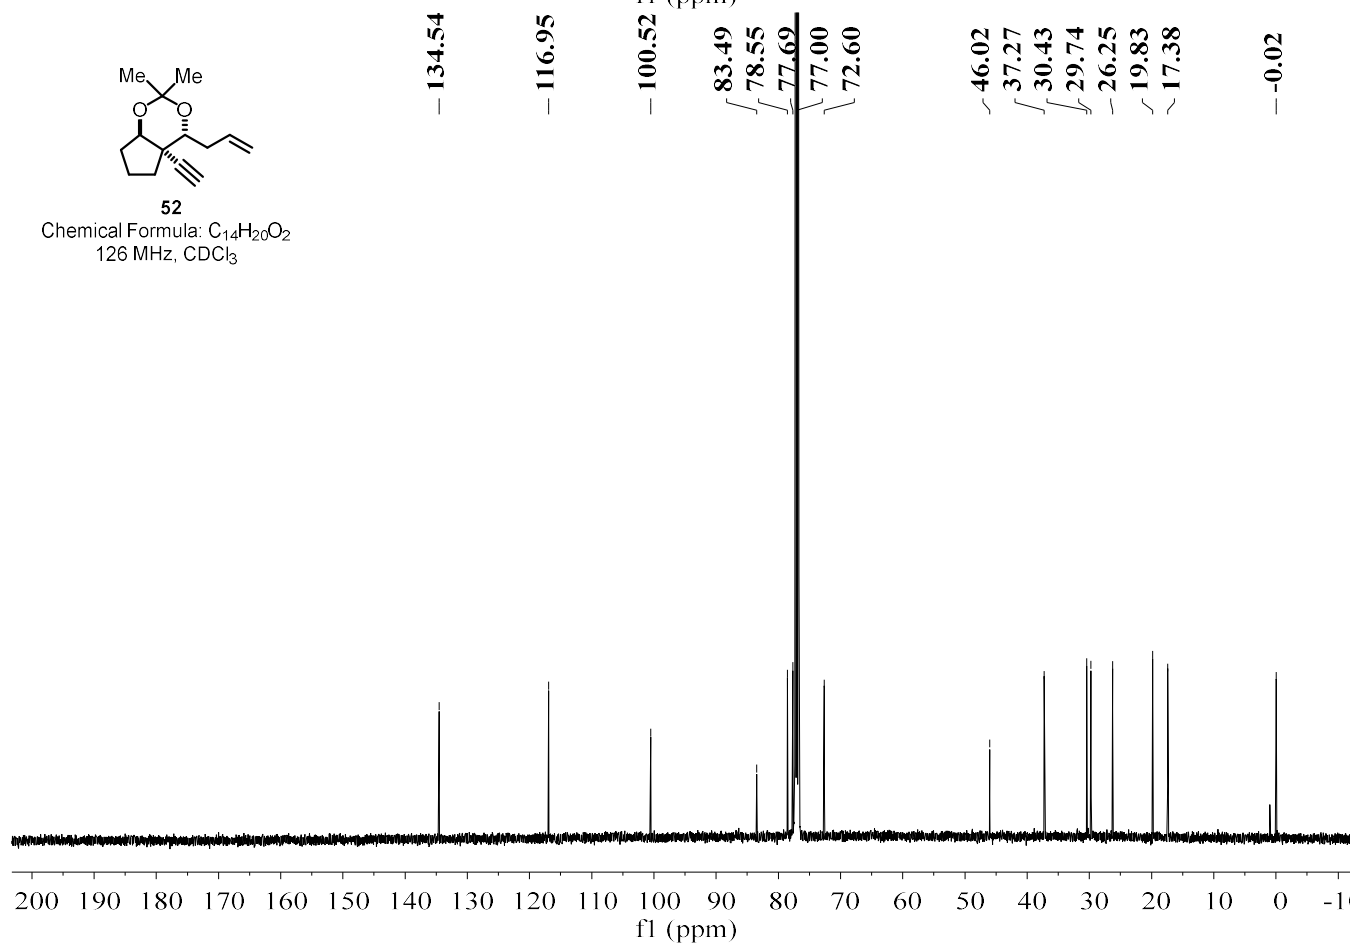

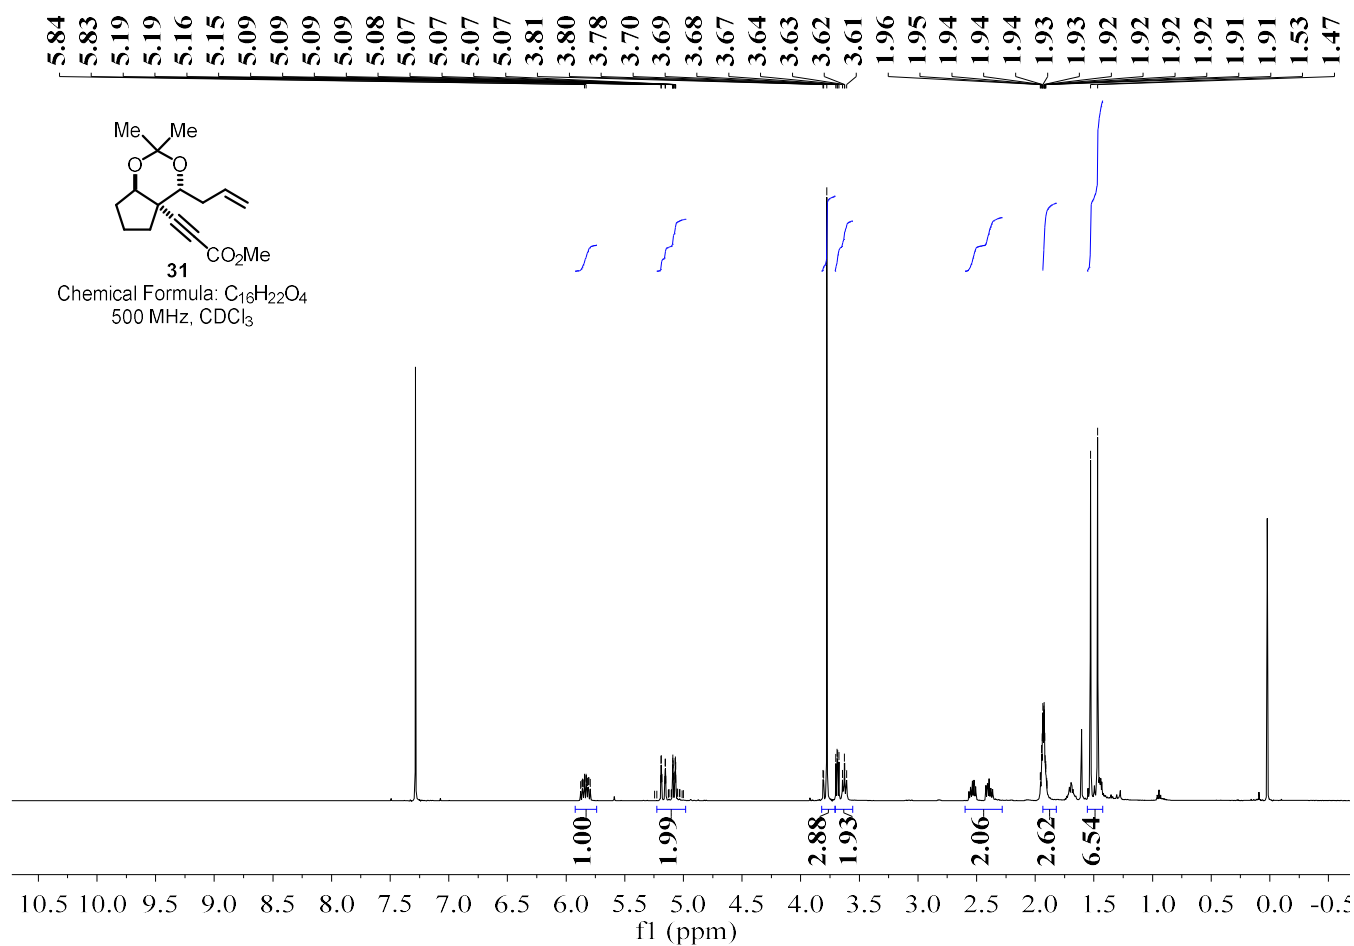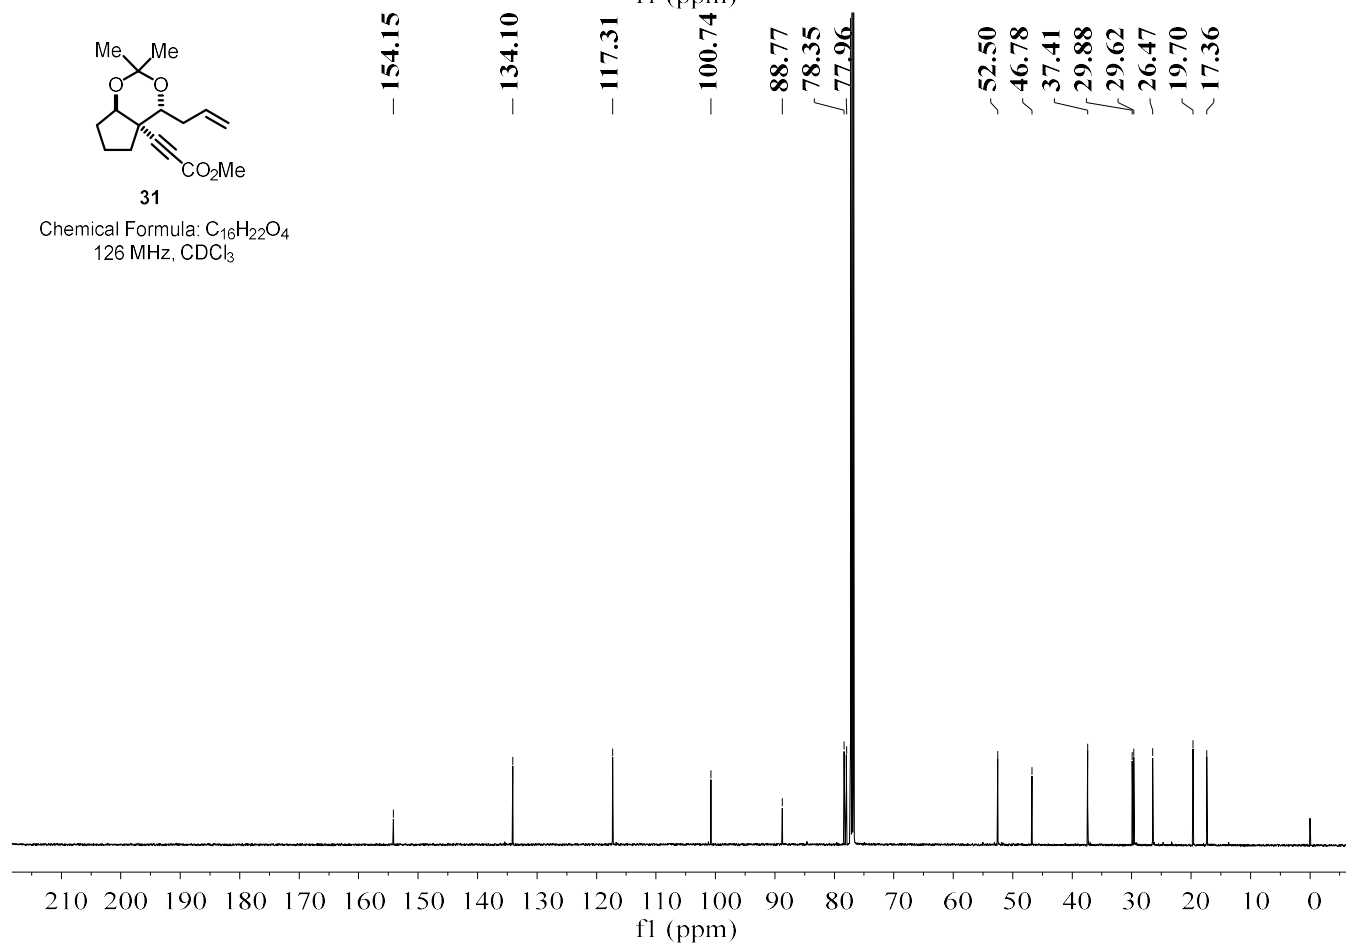

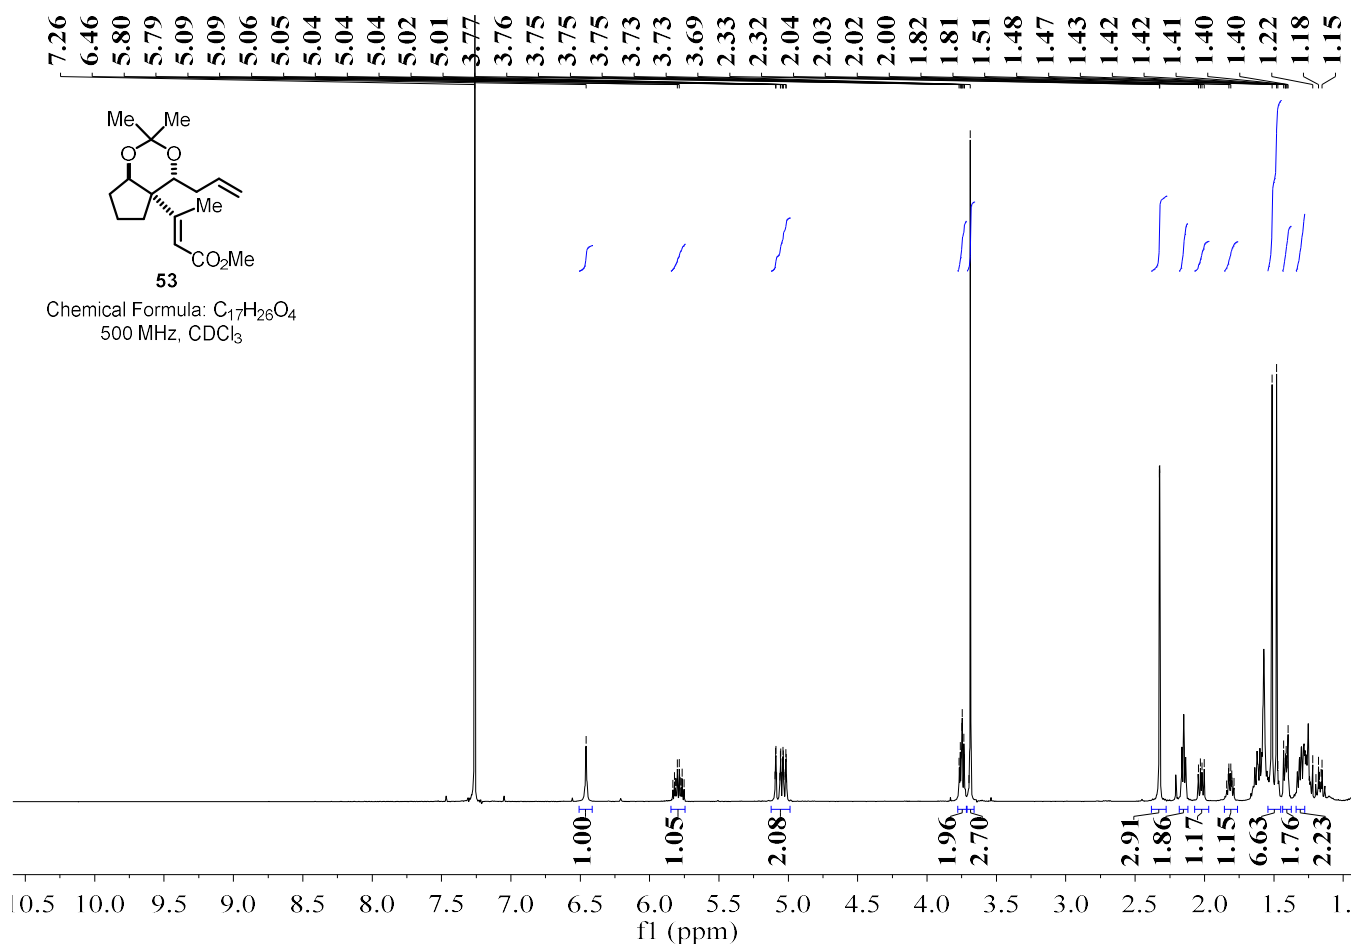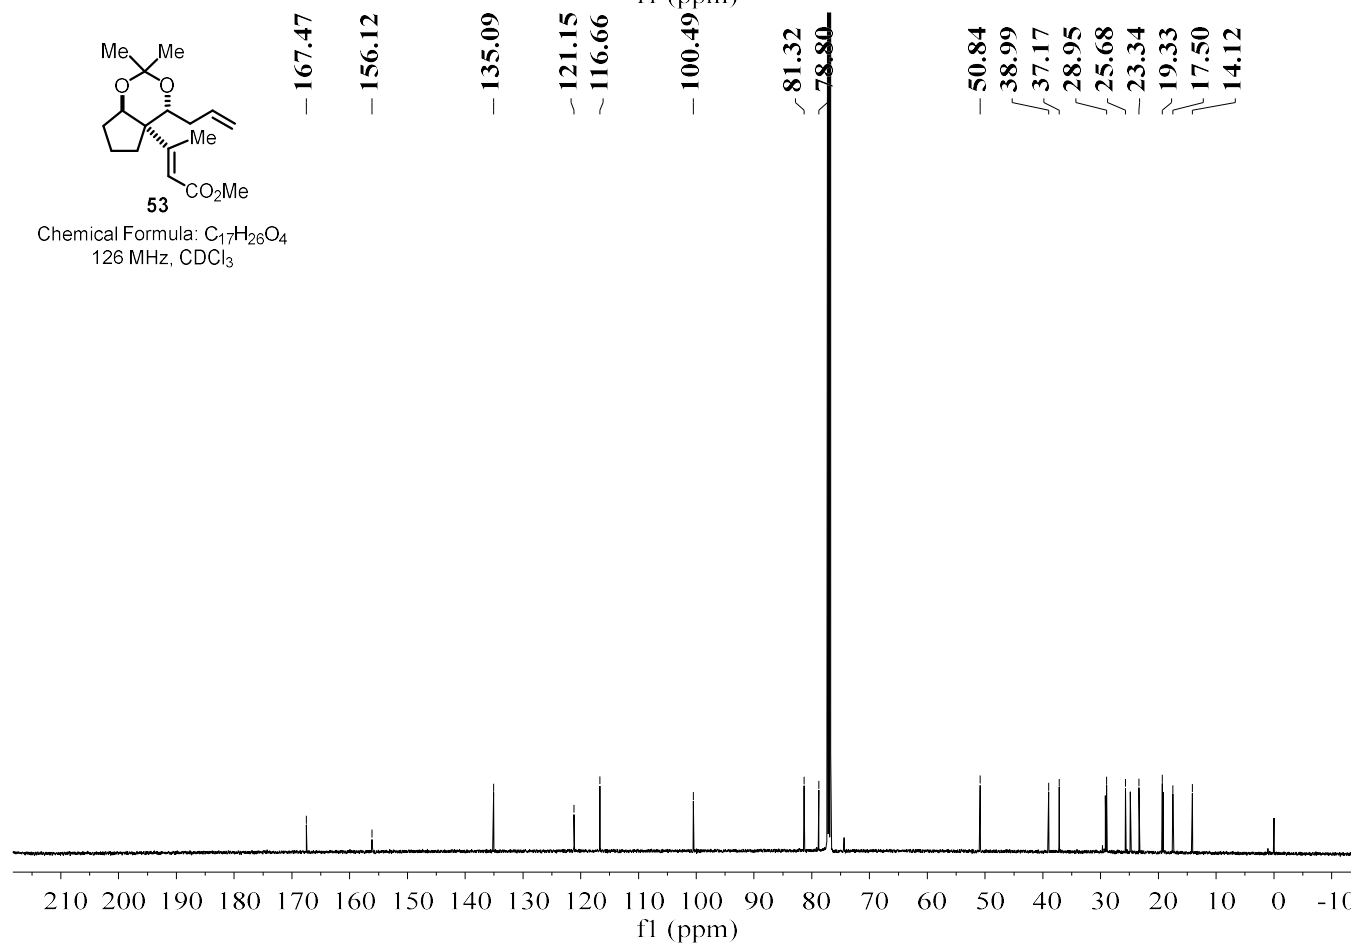



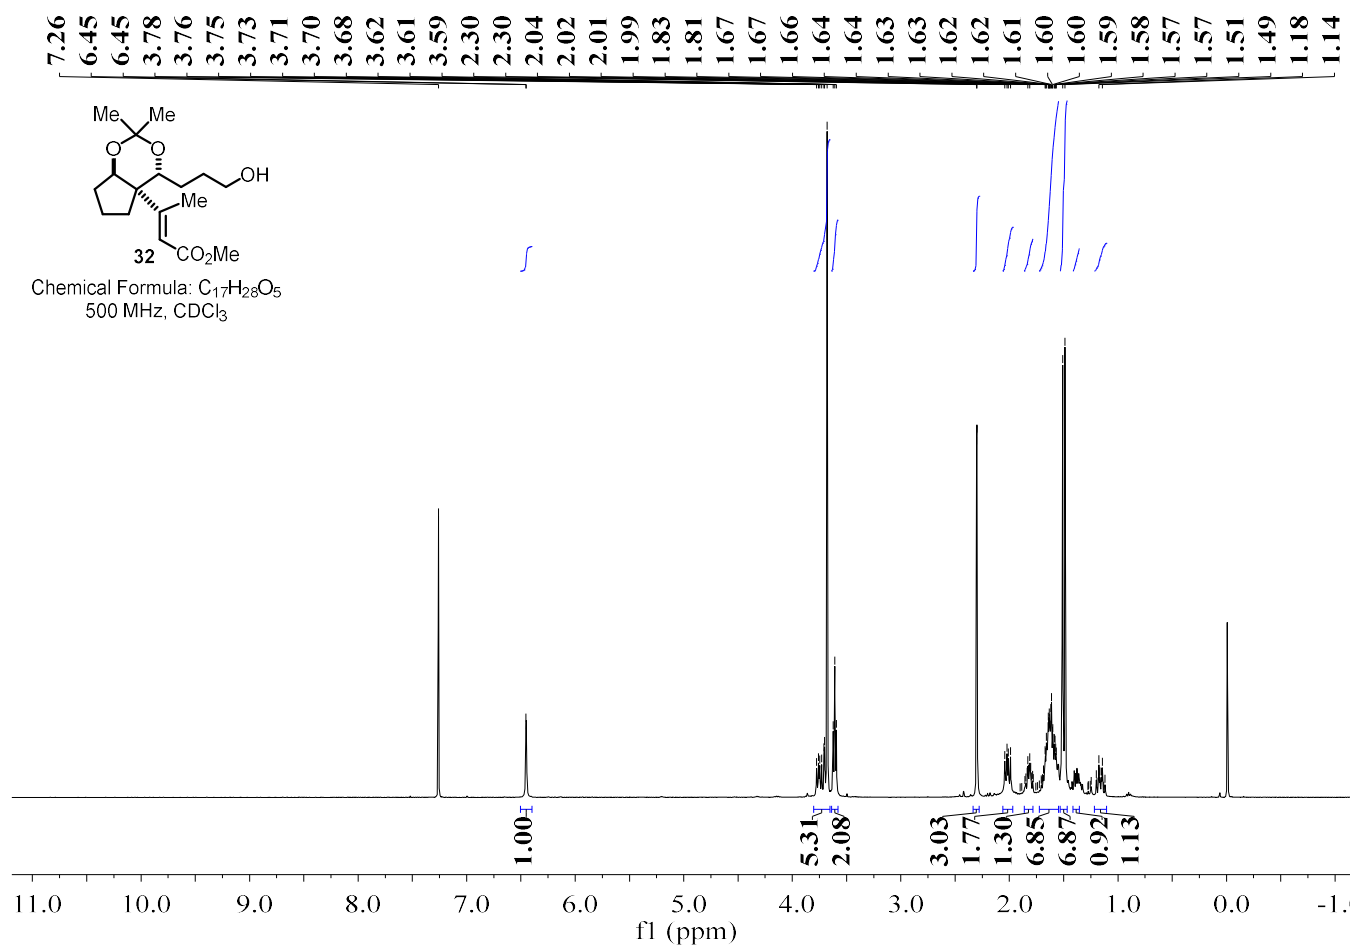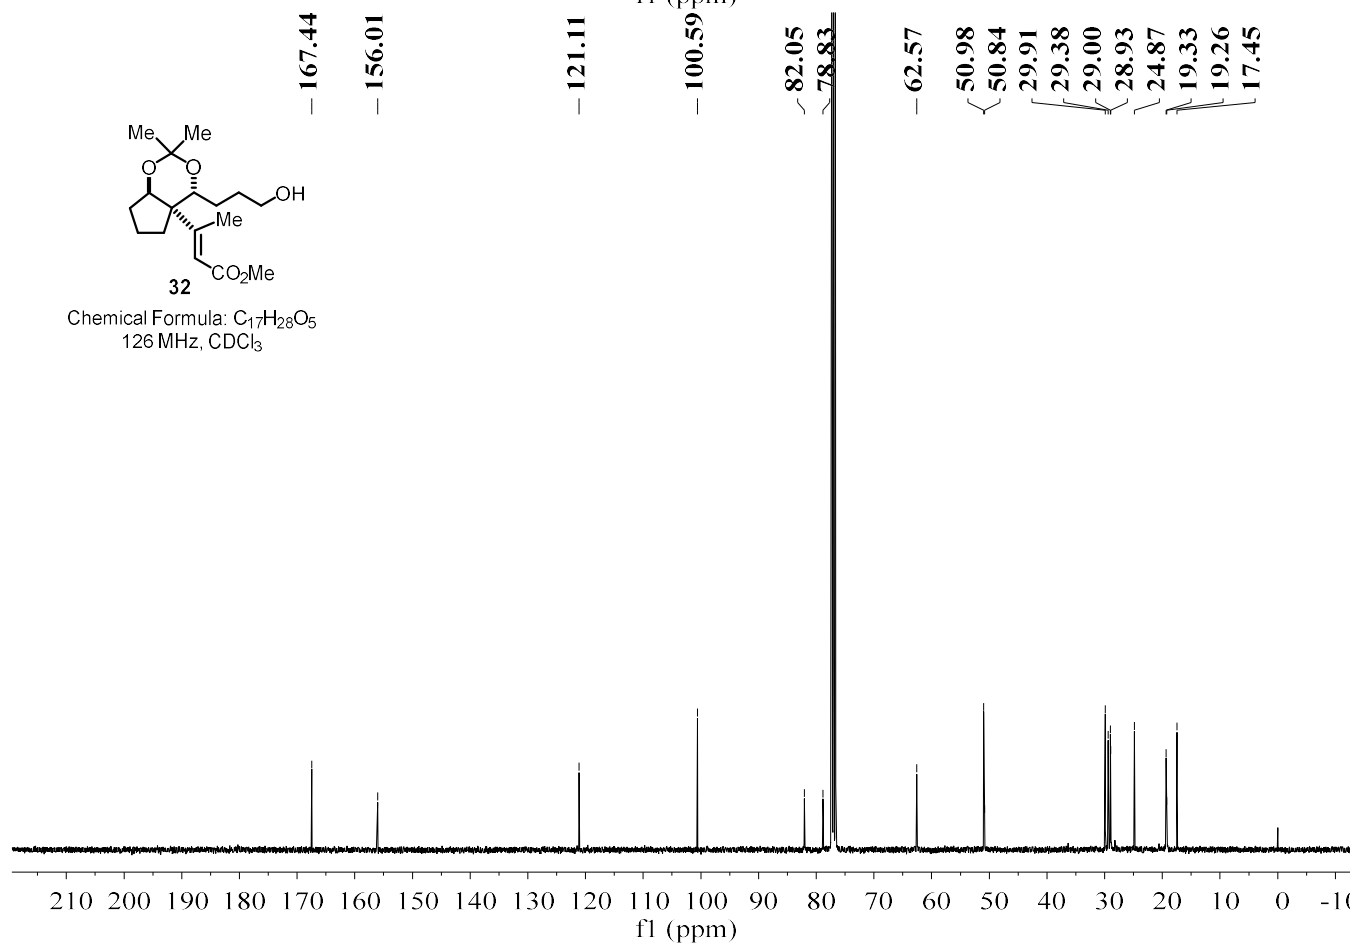

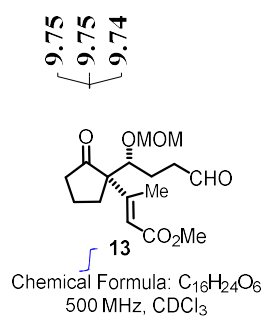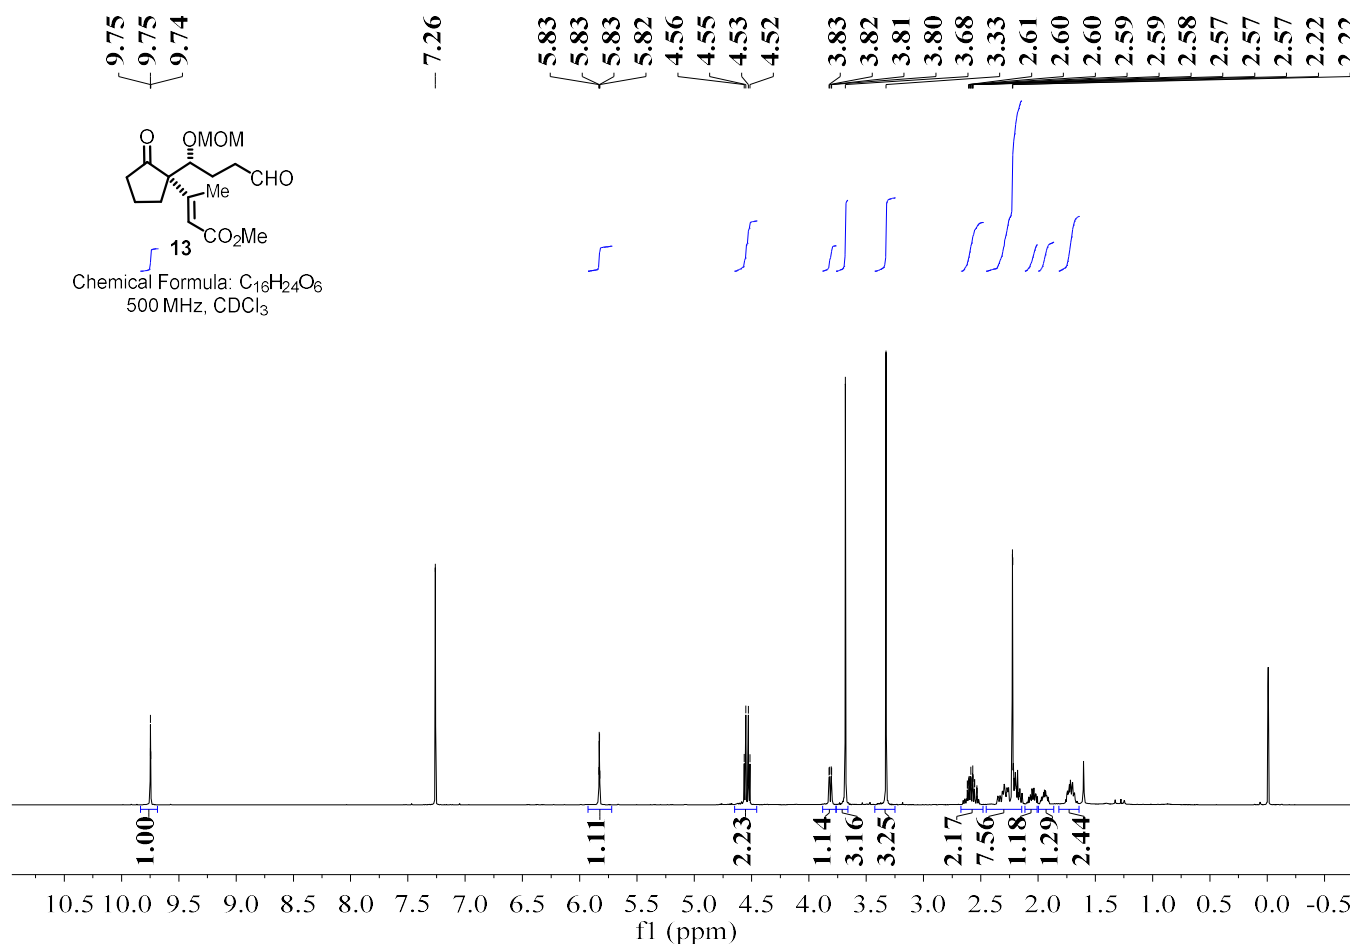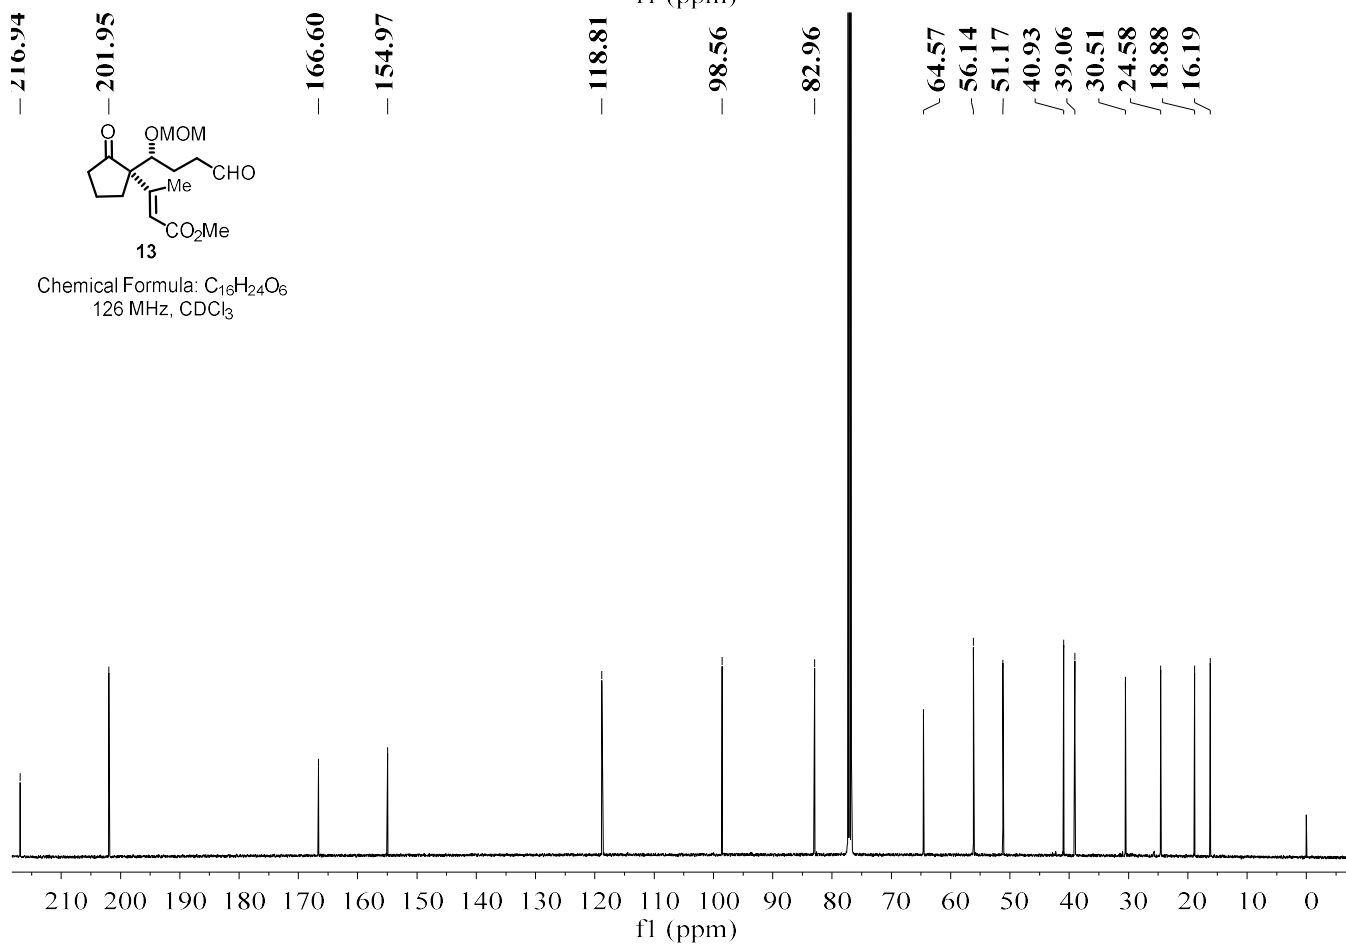

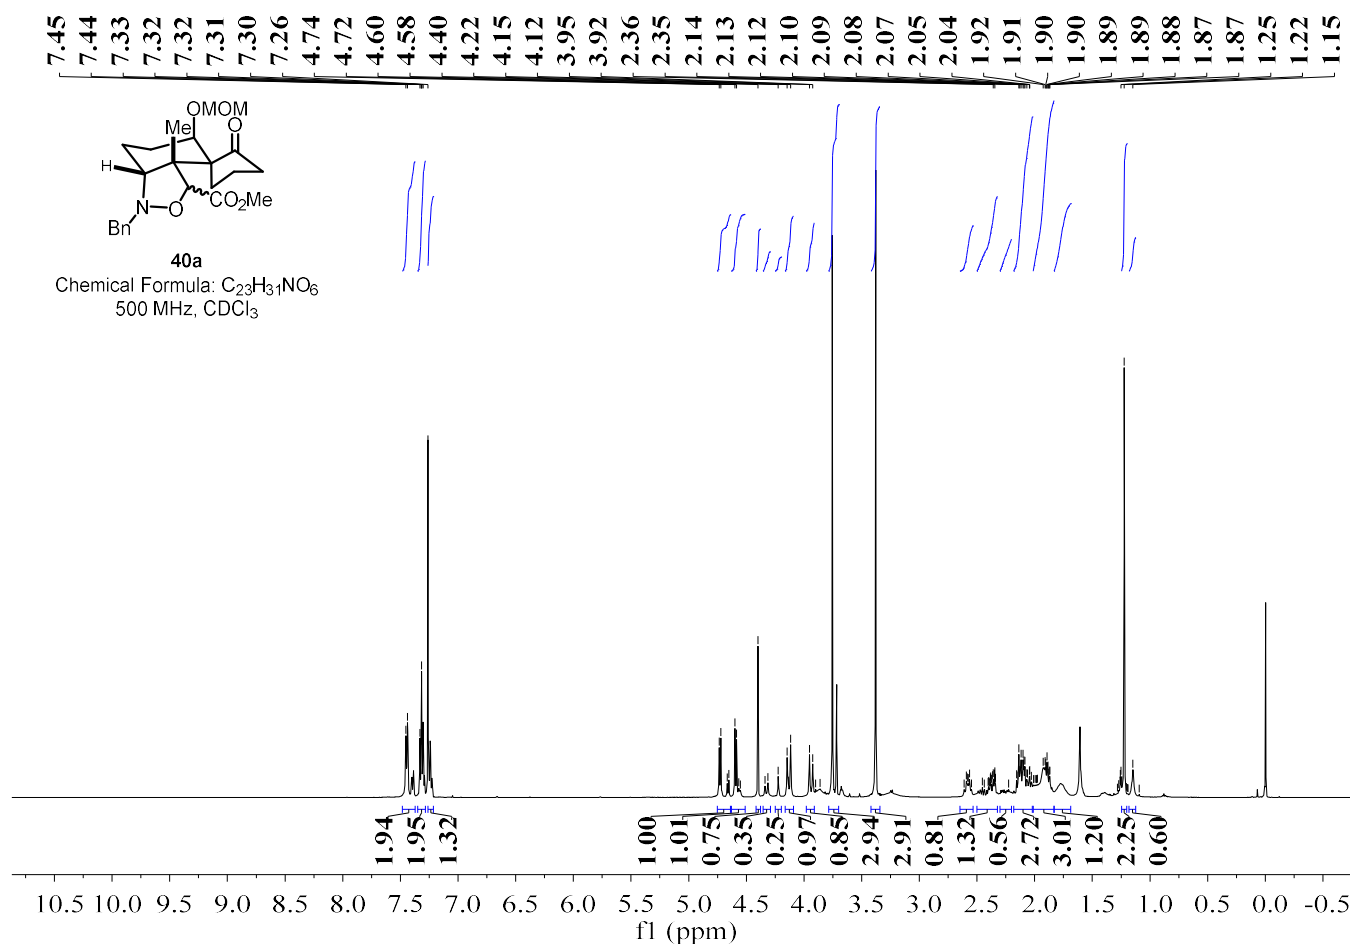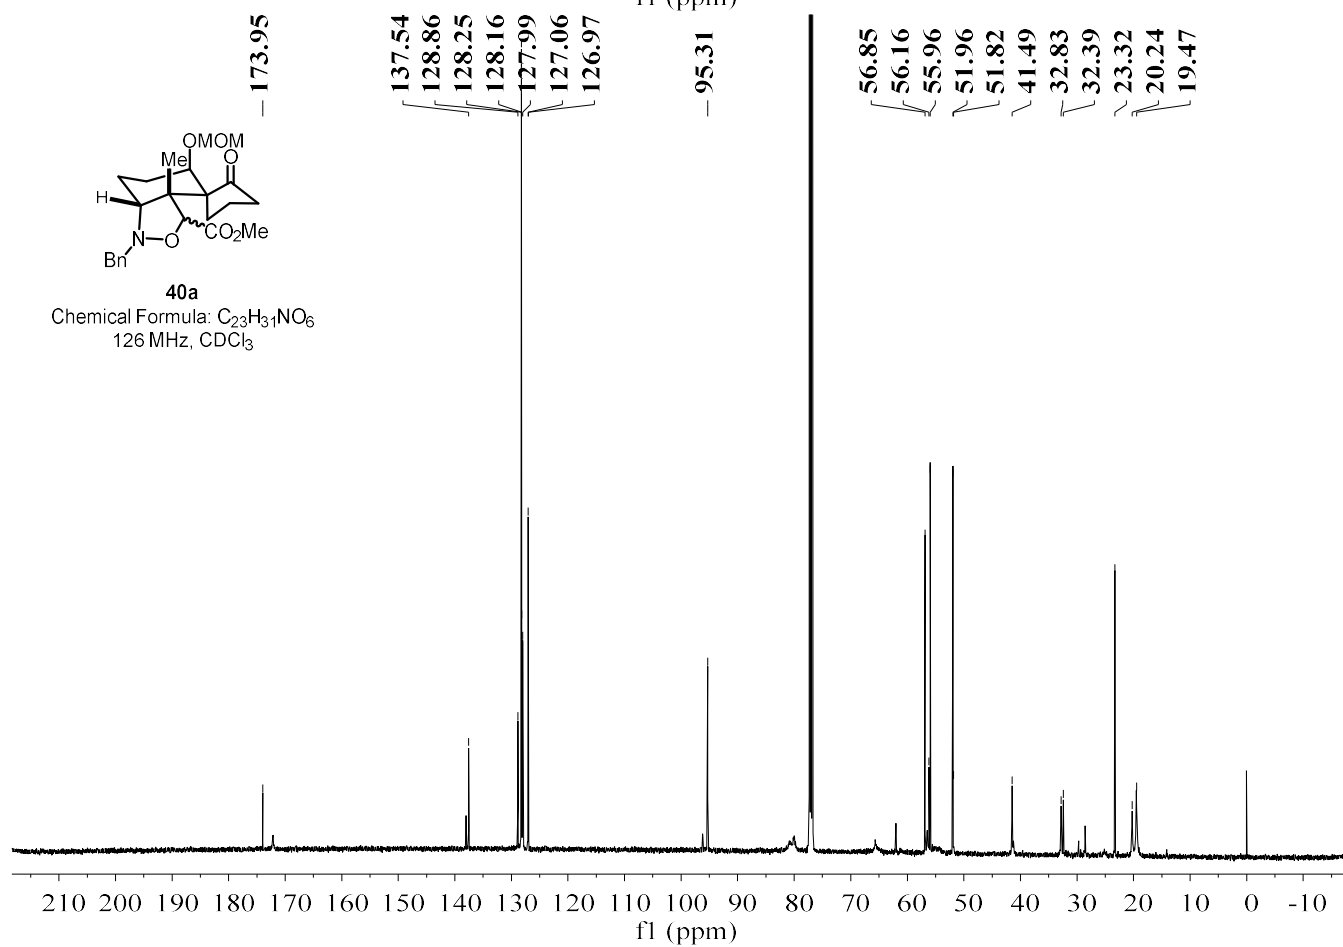

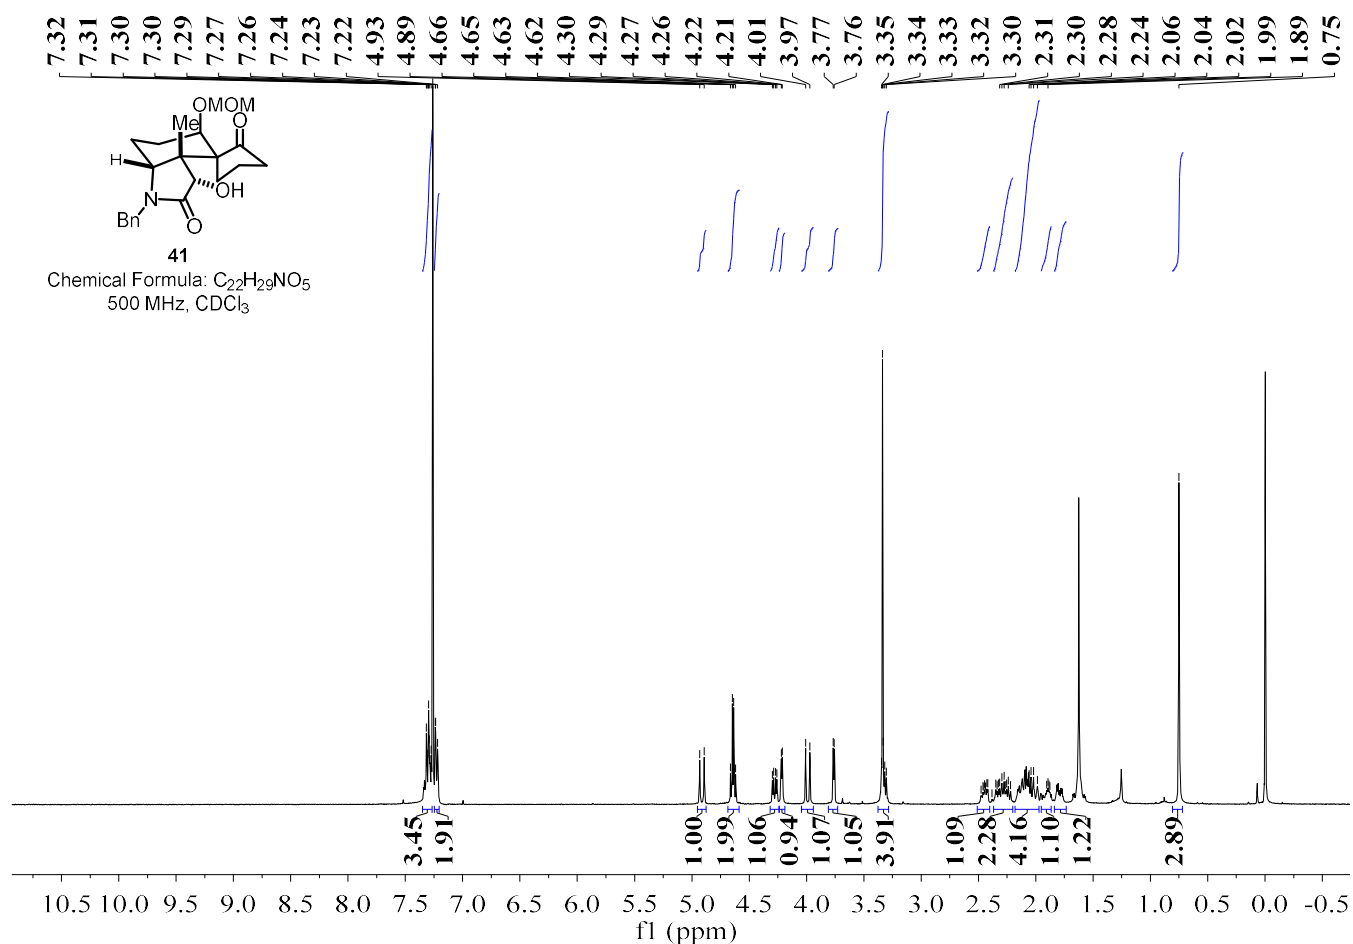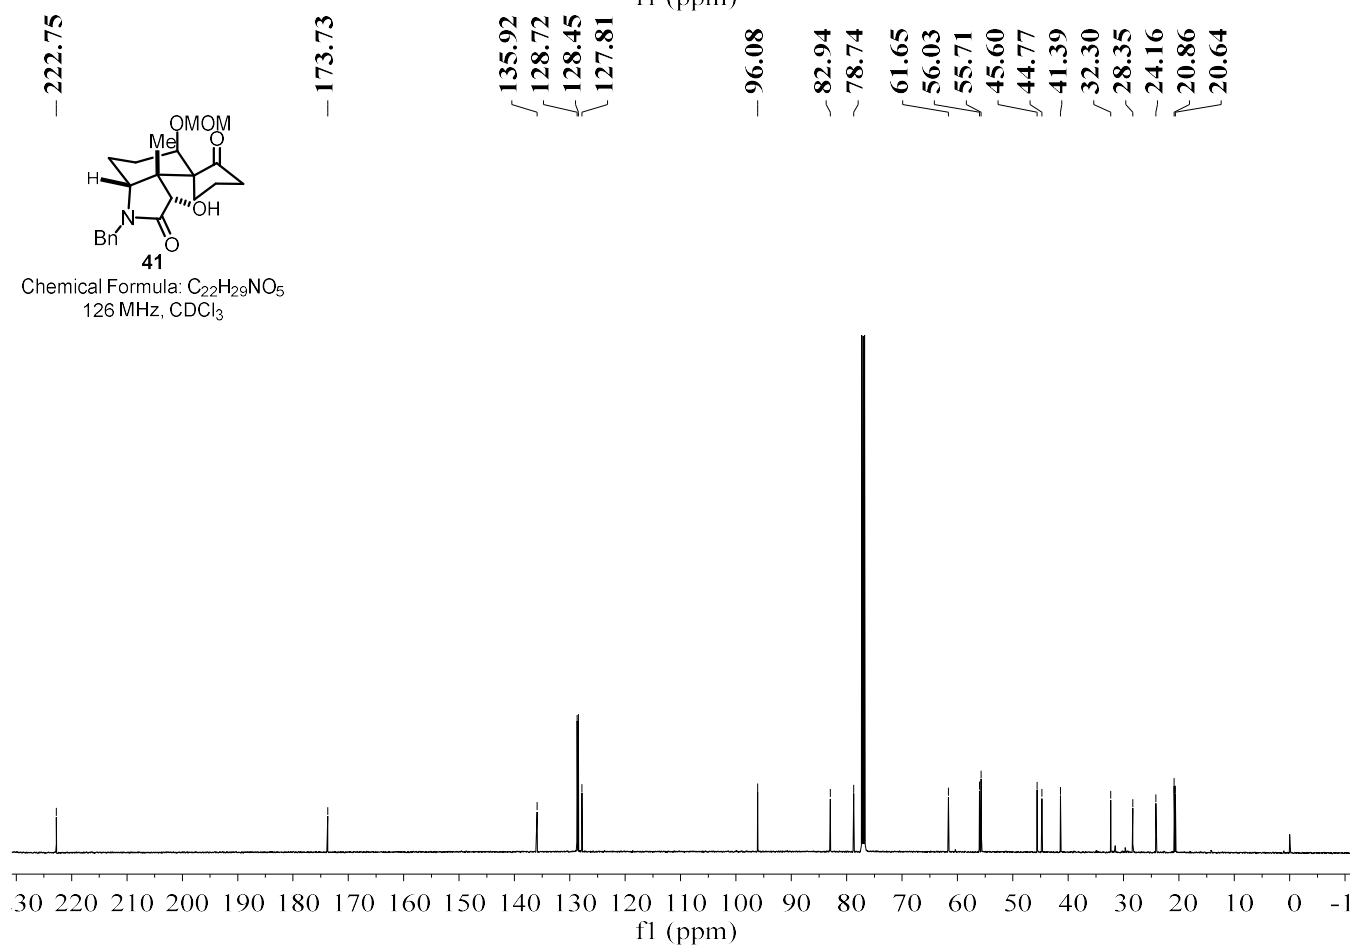

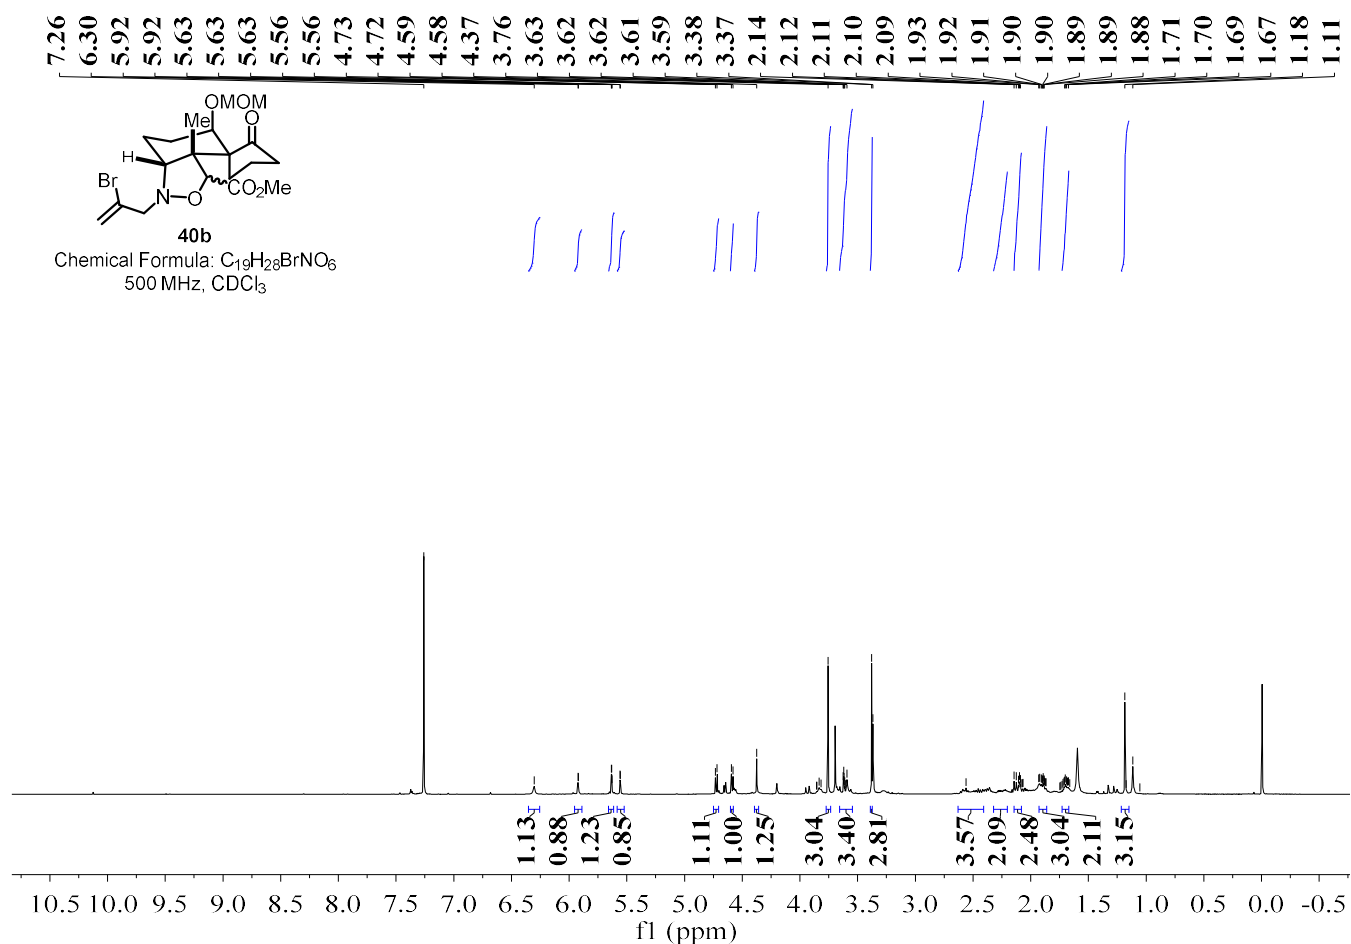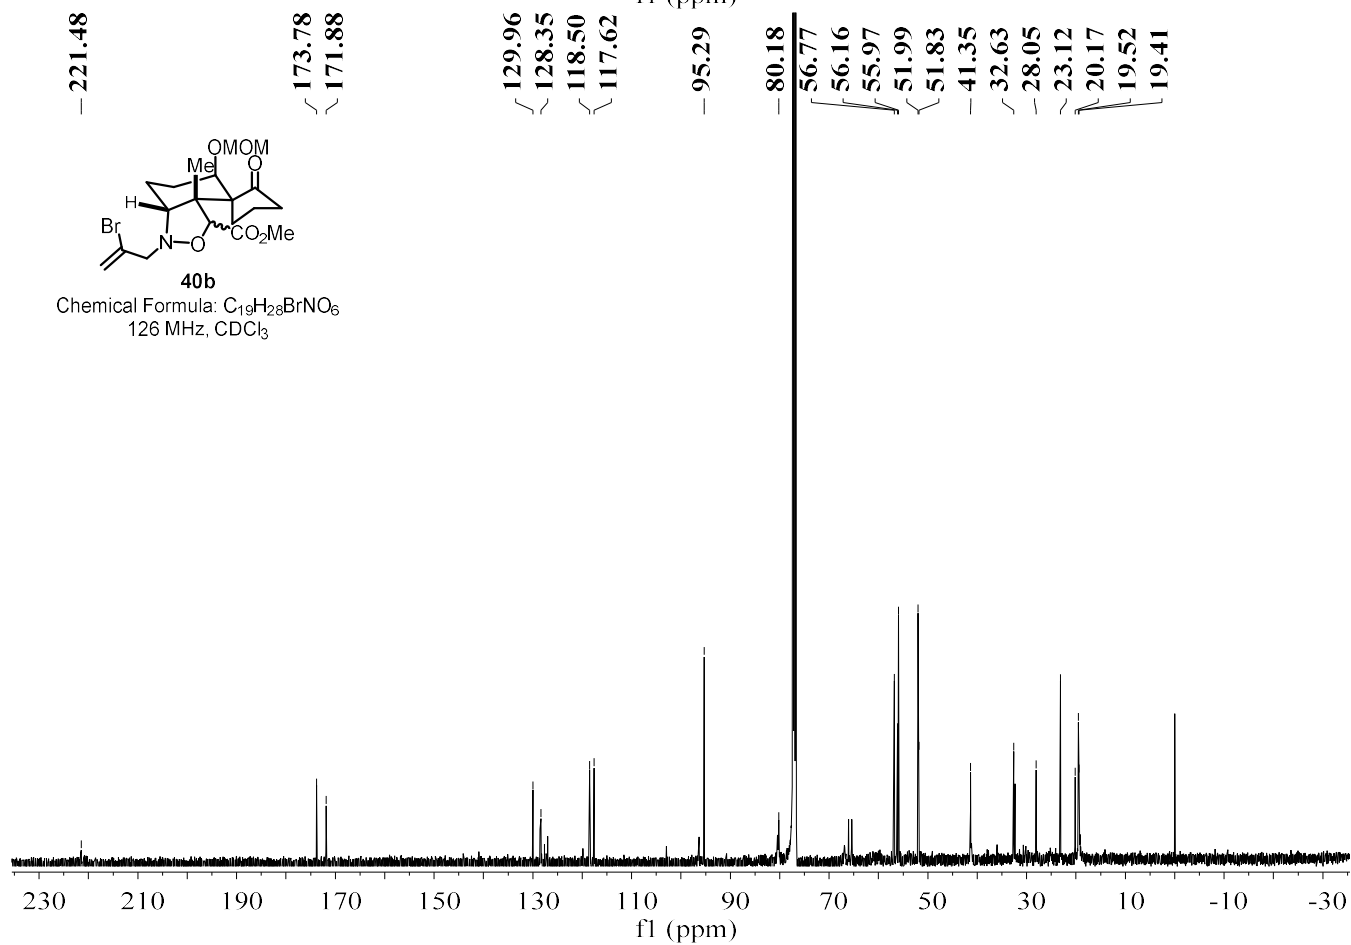

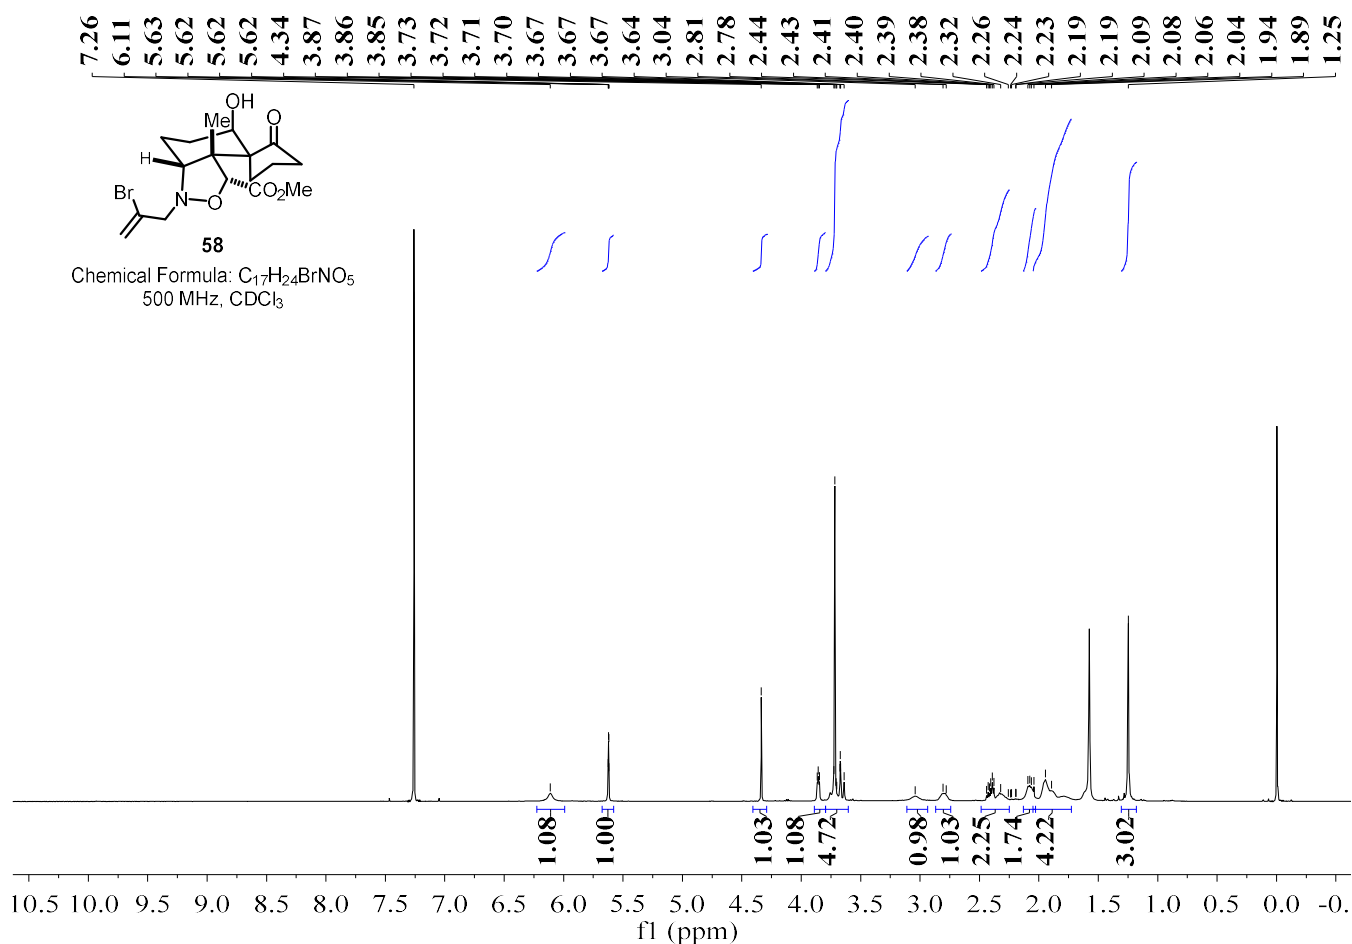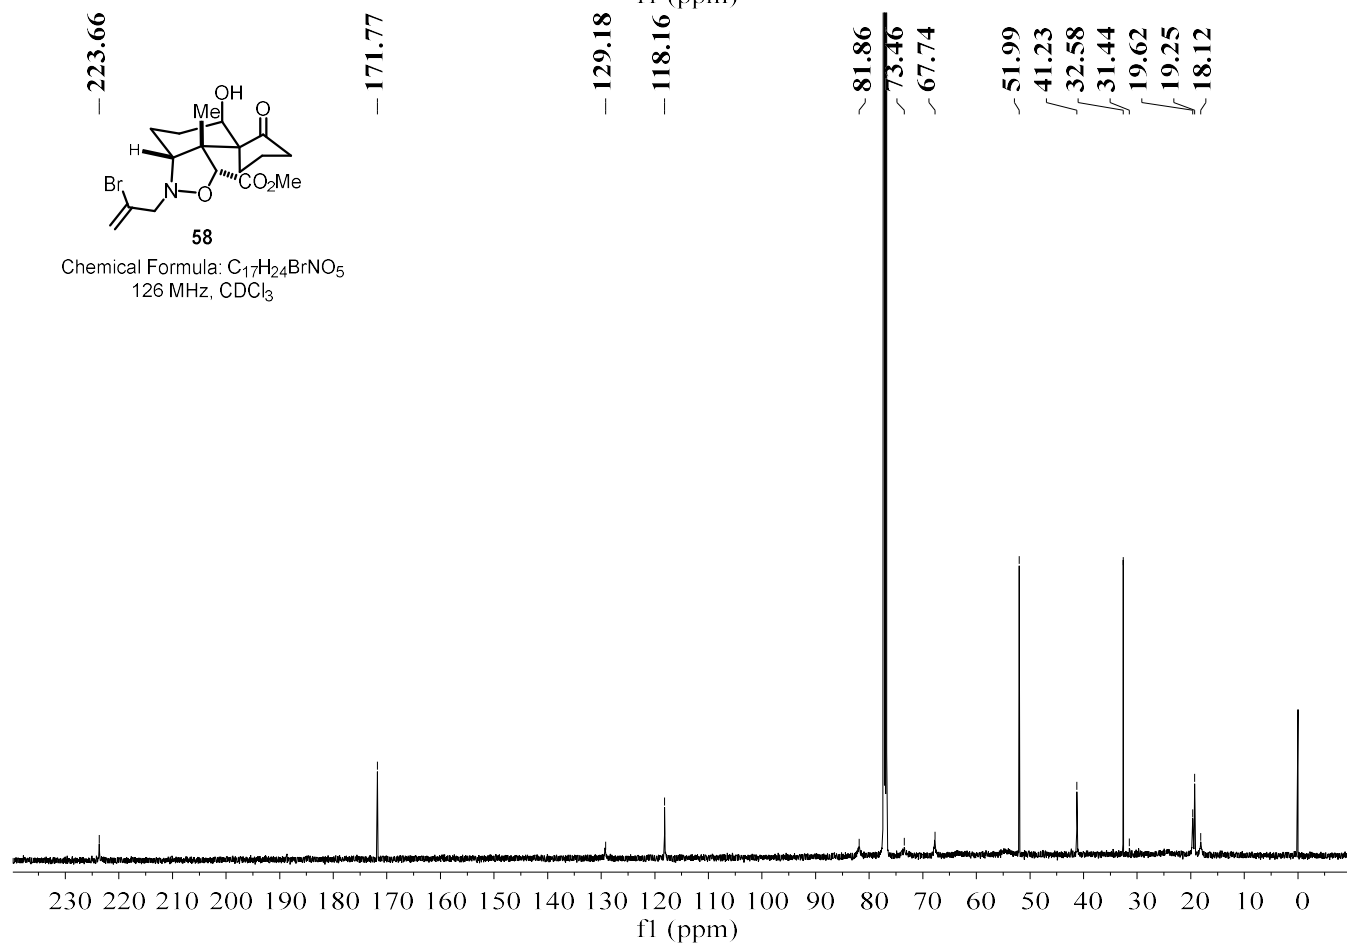

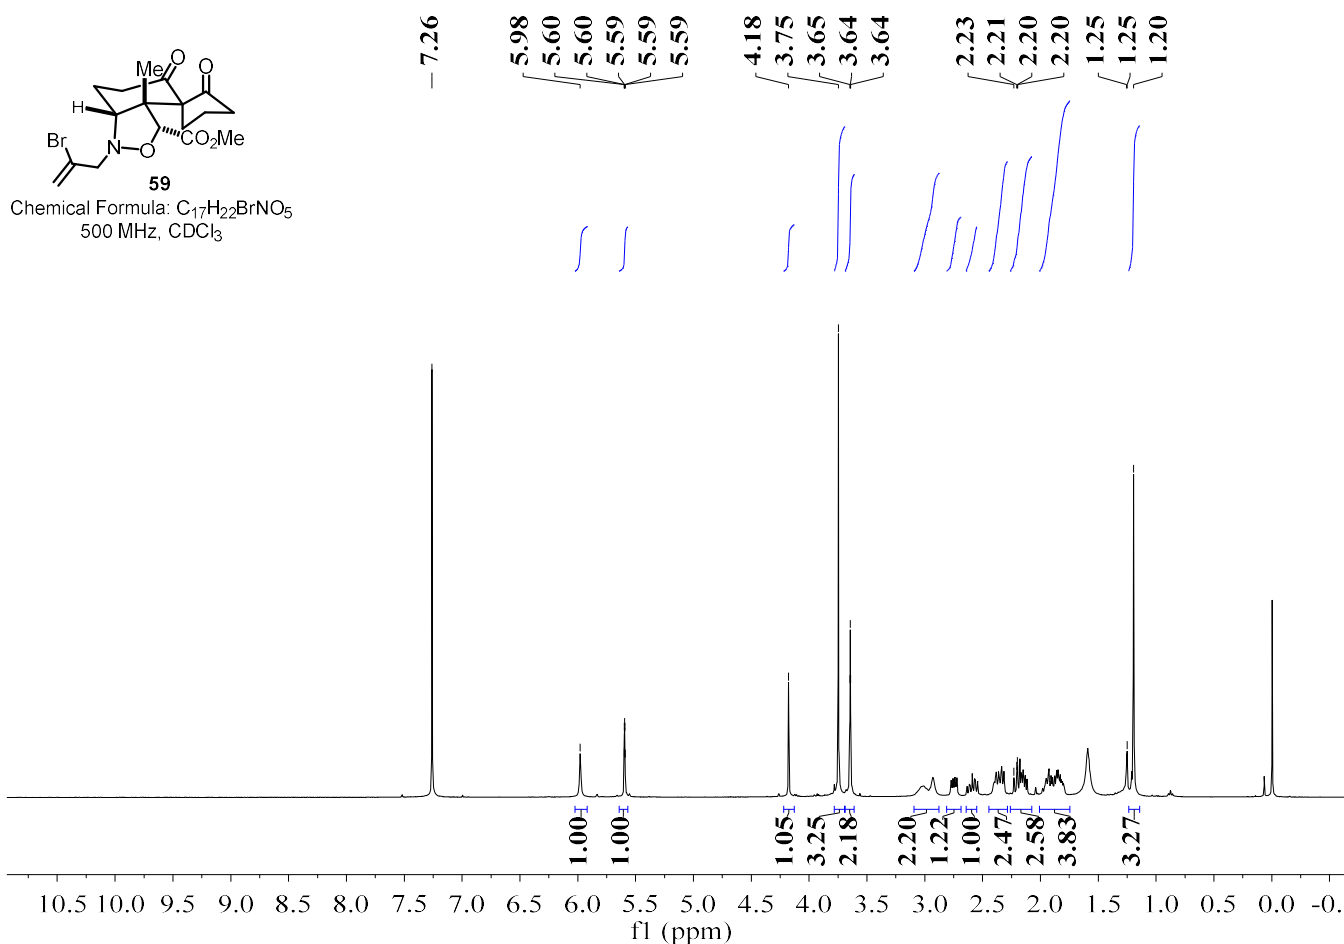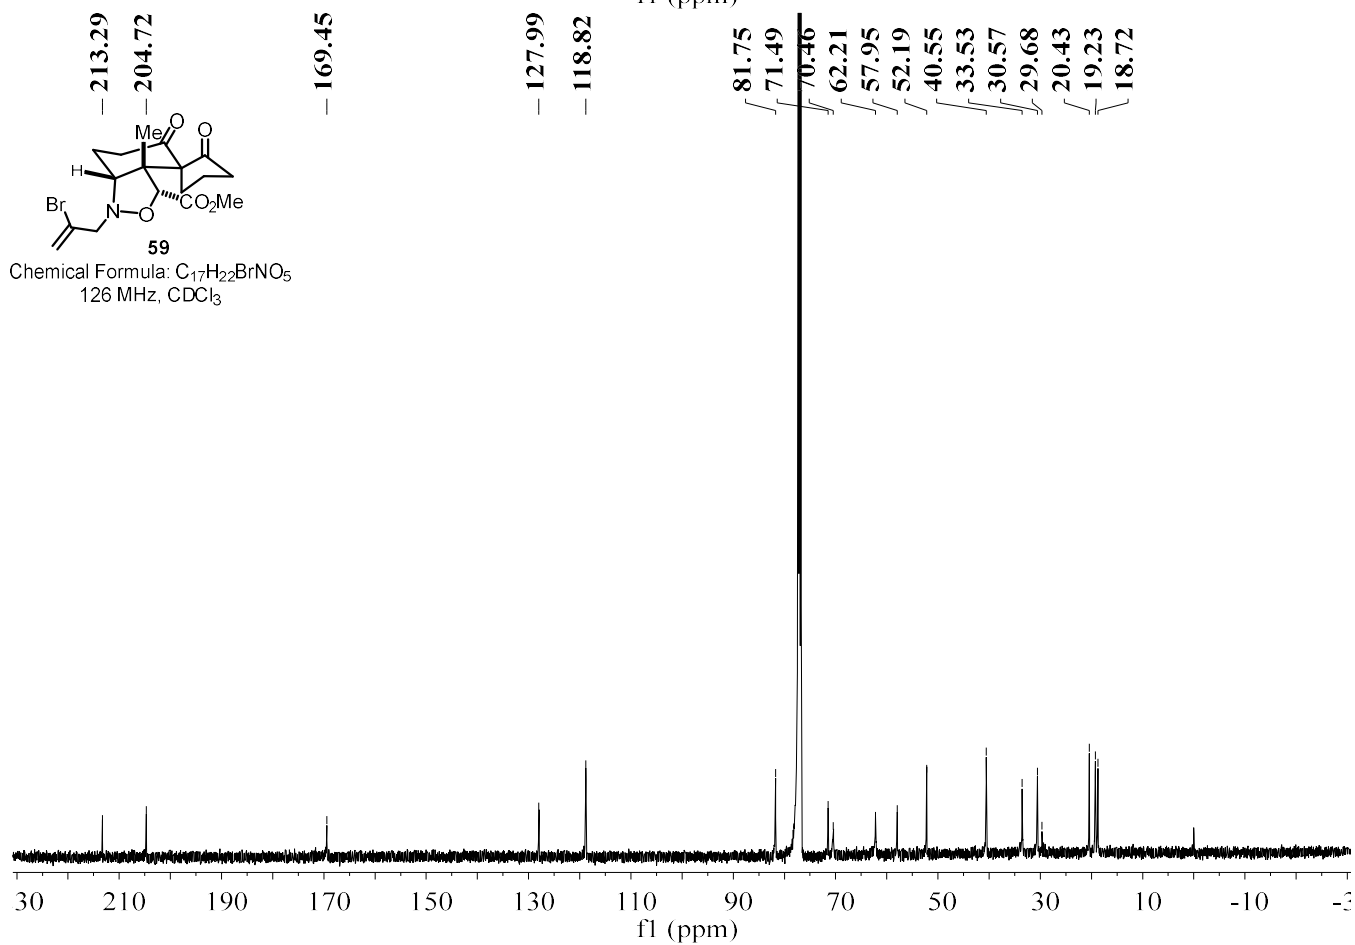

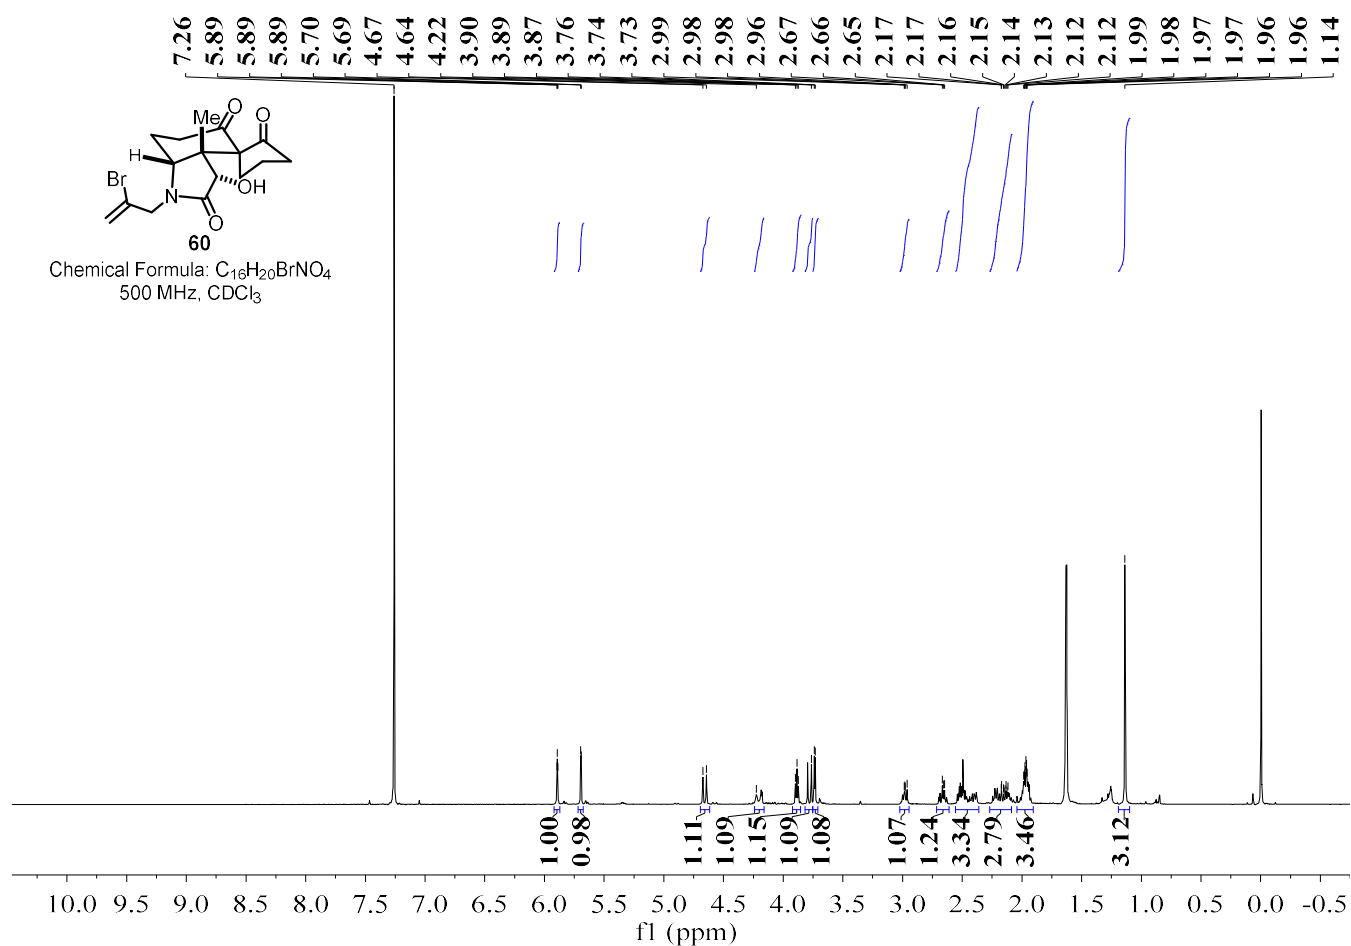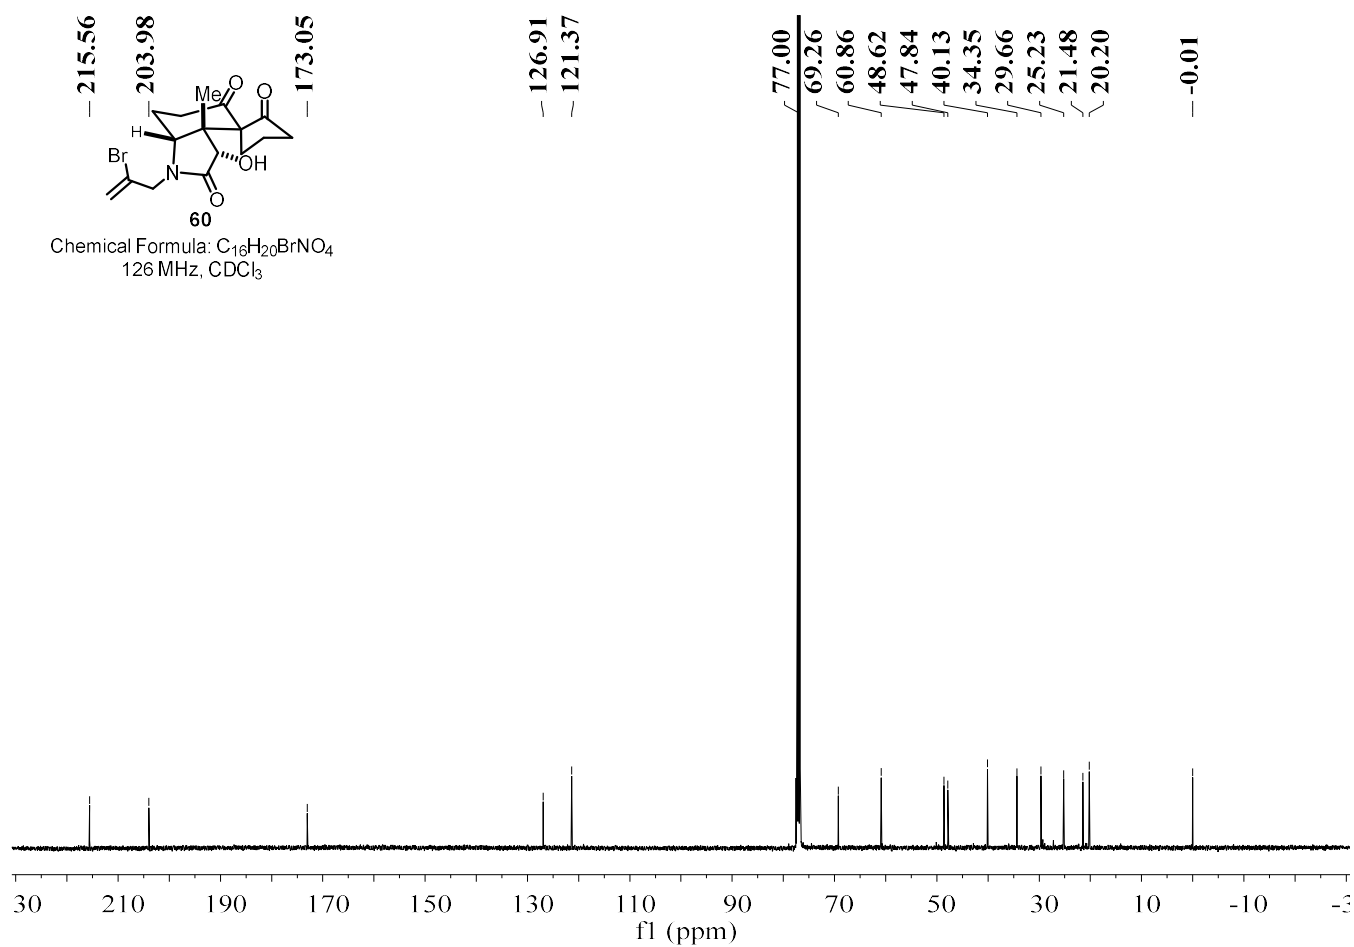



According to the 2 D spectra (HSQC and NOESY of compound **33**), H<sub>a</sub> and H<sub>b</sub> have no correlation in steric configuration at all, which proves the the [5,6] rings possess a *cis* configuration, the two C-O side chains are *trans* configuration.

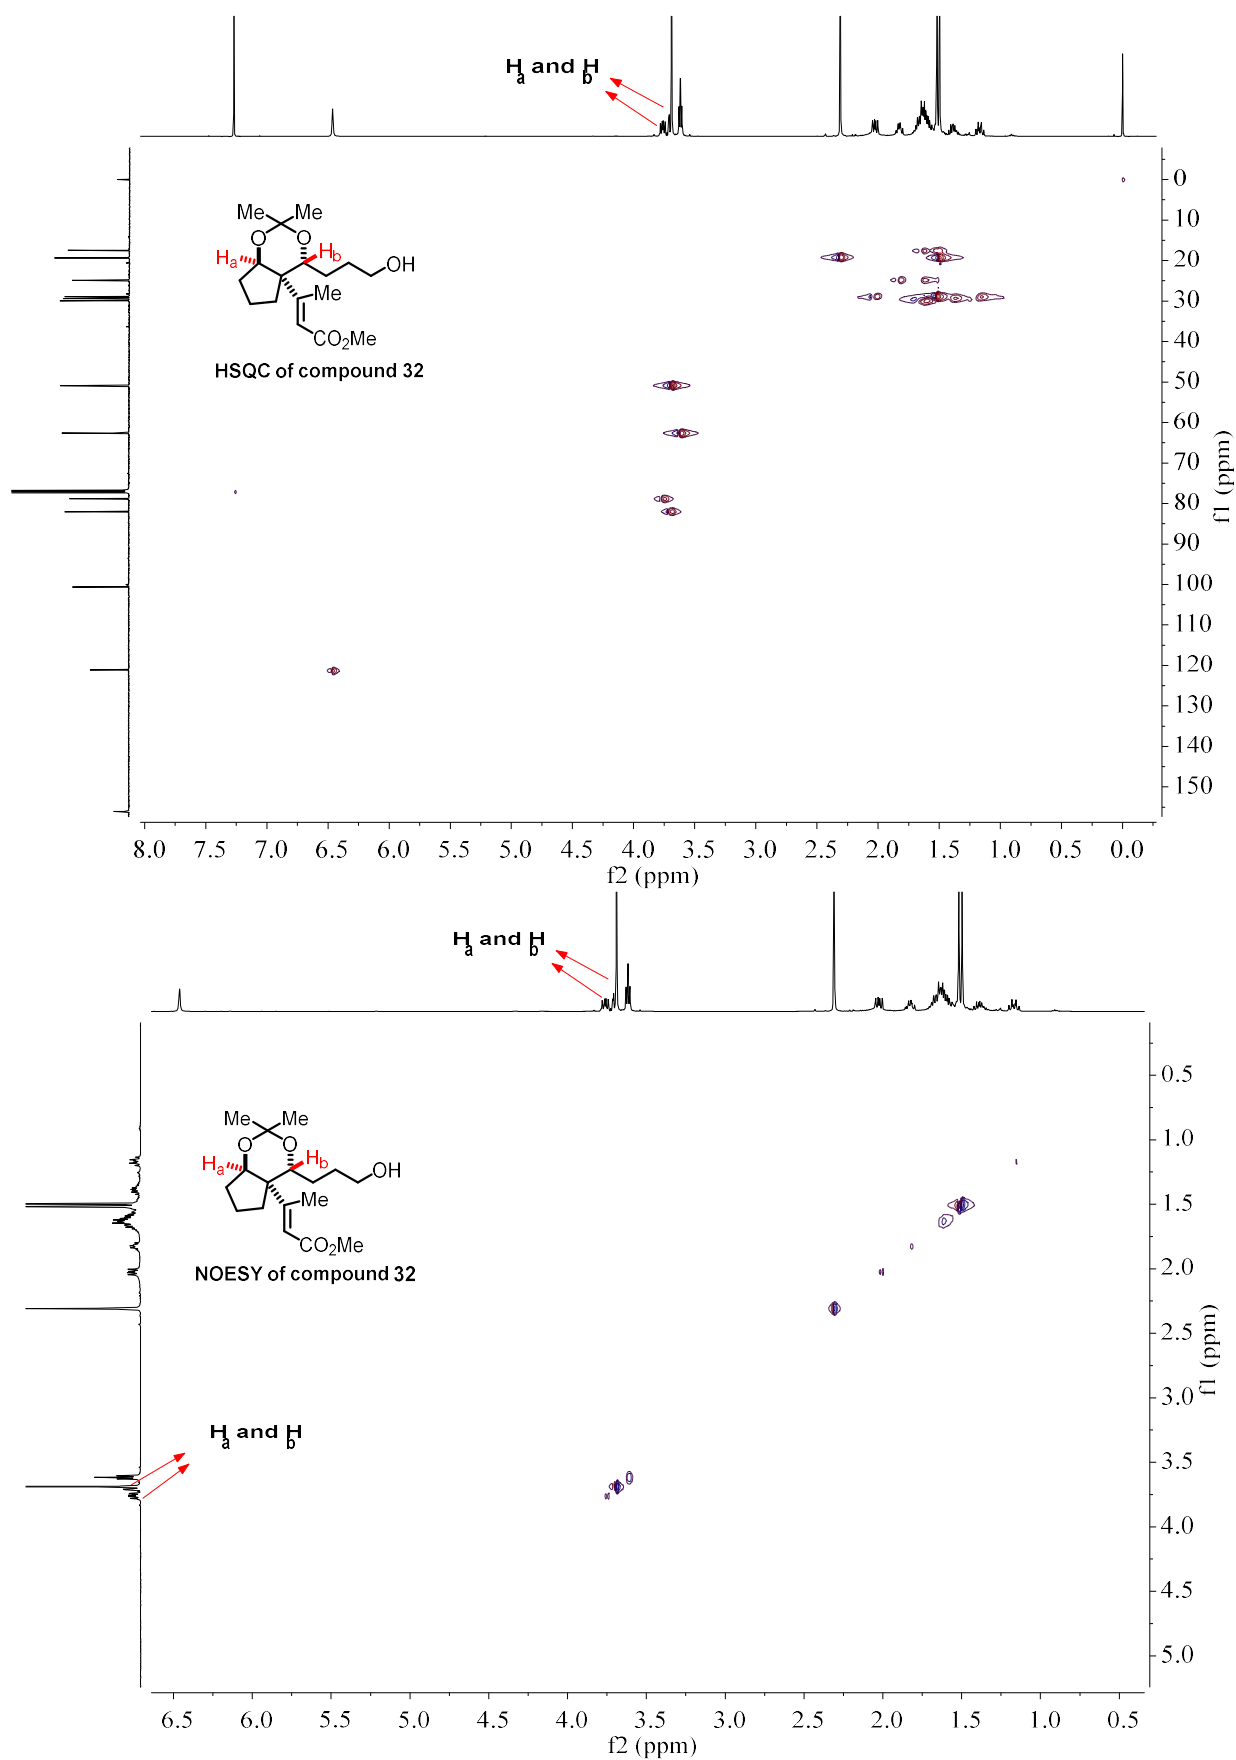

Supplement: c9qo01111k2.pdf [file c9qo01111k2.pdf]
