# Supplementary material for: Exploration of 1,3-dipolar cycloaddition reactions to construct the core skeleton of Calyciphylline A-type alkaloids
Source: Royal Society of Chemistry journal article supplement (doi:10.1039/c9qo01111k), 2019-01-01
Supplement: c9qo01111k1.pdf [file c9qo01111k1.pdf]

**Graphic Abstract:**

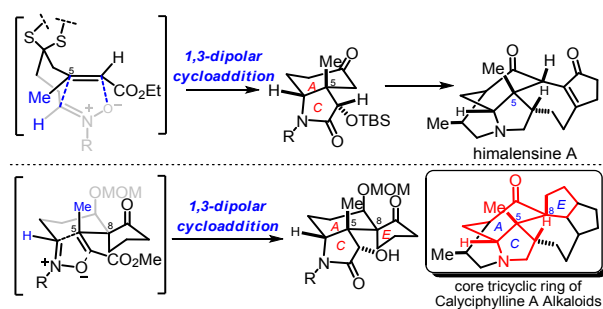

**Keywords:** *Daphniphyllum* Alkaloids, Calyciphylline A-type, all-carbon quaternary centers, nitron, 1,3-dipolar cycloaddition.
